# Supplementary material for: Quantitative GPCR and ion channel transcriptomics in primary alveolar macrophages and macrophage surrogates
Source: BMC Immunol. 2012 Oct 26;13:57. doi: 10.1186/1471-2172-13-57 (PMC3542584; doi:10.1186/1471-2172-13-57)
Supplement: Additional file 2 — Table S1. GPCR raw data. Table S2. Ion Channels raw data. [file 1471-2172-13-57-S2.xlsx]

## Sheet: GPCR raw data
GPCR arrays		Average Ct values all GPCR primer/probe sets												Average delta Ct values all GPCR primer/probe sets
		Macrophages		MDMs		Monocytes		HL60		THP1		U937		Macrophages		MDMs		Monocytes		HL60		THP1		U937
Gene - Applied Biosystems code	Type	Average	SD	Average	SD	Average	SD	Average	SD	Average	SD	Average	SD	Average	SD	Average	SD	Average	SD	Average	SD	Average	SD	Average	SD
ACTB-Hs99999903_m1	Selected Control	17.5719	0.620339	17.1585	0.298942	18.4085	1.02802	16.6177	0.589763	18.5222	0.585997	17.3819	0.054719	-3.45645	0.593868	-3.79224	0.195046	-4.38102	0.208297	-4.14233	0.0340535	-3.28893	0.494829	-3.3567	0.182947
ADCYAP1R1-Hs00153869_m1	Target	40	0	37.2476	6.15455	38.522	2.6005	37.6579	4.05664	38.0017	2.73598	40	0	18.9717	0.0461938	16.2969	5.93935	15.7325	3.32013	16.8979	4.1577	16.1905	2.81681	19.2614	0.160044
ADMR-Hs00200681_m1	Target	40	0	40	0	40	0	40	0	40	0	40	0	18.9717	0.0461938	19.0493	0.284944	17.2105	0.848364	19.24	0.565314	18.1889	0.327999	19.2614	0.160044
ADORA1-Hs00181231_m1	Target	27.8609	1.9842	30.0372	1.21152	33.03	1.40793	28.5957	0.918669	30.3951	0.244586	40	0	6.8326	1.94945	9.08638	1.3514	10.2404	1.85218	7.83563	0.392159	8.584	0.289273	19.2614	0.160044
ADORA2A-Hs00169123_m1	Target	25.3537	1.21055	29.6617	0.981475	28.069	1.24329	27.9574	0.80767	26.8931	0.459381	25.0354	0.15158	4.32535	1.22312	8.71096	1.1218	5.2795	0.73125	7.19737	0.266172	5.082	0.190718	4.29683	0.0894649
ADORA2B-Hs00386497_m1	Target	26.0269	1.03989	25.4148	1.73405	28.5007	2.30248	27.0462	0.691156	26.4575	0.18916	38.3775	2.54762	4.99858	1.01605	4.46408	1.51232	5.71112	2.13449	6.2862	0.247793	4.6464	0.294184	17.639	2.51936
ADORA3-Hs00181232_m1	Target	29.6388	2.40305	25.5446	0.548921	29.3788	0.633972	25.3922	0.615353	27.872	0.343689	30.3688	0.6462	8.61043	2.38694	4.59384	0.483584	6.58928	0.853876	4.63217	0.0975429	6.06087	0.244135	9.63027	0.768652
ADRA1A-Hs00169124_m1	Target	40	0	38.8127	2.65493	39.3614	1.42795	40	0	40	0	40	0	18.9717	0.0461938	17.8619	2.62469	16.5718	1.35924	19.24	0.565314	18.1889	0.327999	19.2614	0.160044
ADRA1B-Hs00171263_m1	Target	38.704	2.59205	38.7859	2.71477	40	0	40	0	32.561	0.927043	34.4899	1.21433	17.6756	2.59376	17.8352	2.71689	17.2105	0.848364	19.24	0.565314	10.7498	0.803698	13.7513	1.37212
ADRA1D-Hs00169865_m1	Target	40	0	37.4528	3.50224	40	0	40	0	30.1925	0.694198	40	0	18.9717	0.0461938	16.502	3.28289	17.2105	0.848364	19.24	0.565314	8.38137	1.01693	19.2614	0.160044
ADRA2A-Hs00265081_s1	Target	39.6449	0.71025	40	0	39.1216	1.69477	38.7274	2.20427	37.2305	2.44936	37.992	1.78163	18.6166	0.753483	19.0493	0.284944	16.332	1.53705	17.9673	2.33577	15.4194	2.29306	17.2535	1.87145
ADRA2B-Hs00265090_s1	Target	30.834	1.48626	23.9041	0.836985	36.3967	4.93467	23.1962	0.529522	26.6855	0.437395	37.0713	2.54187	9.80565	1.44682	2.95336	0.779035	13.6071	4.52716	2.43617	0.099891	4.87437	0.118601	16.3328	2.39054
ADRB1-Hs00265096_s1	Target	30.4566	1.46842	27.8328	1.86344	27.1693	1.02369	35.8441	5.66751	24.328	0.204596	27.2751	0.448289	9.42822	1.42303	6.88212	1.65503	4.3798	1.28925	15.0841	5.66583	2.51693	0.158403	6.5365	0.453003
ADRB2-Hs00240532_s1	Target	25.0569	1.80566	24.5	0.460221	23.4255	0.949483	23.2341	0.524505	23.0762	0.464163	22.9393	0.229006	4.0285	1.79564	3.54928	0.71101	0.63594	0.310781	2.47413	0.0985089	1.26507	0.139238	2.20073	0.117932
ADRB3-Hs00609046_m1	Target	31.0429	2.36233	28.7251	0.871426	39.9193	0.18054	37.3623	2.66686	33.815	1.5559	34.4036	5.53269	10.0146	2.34099	7.77438	0.880165	17.1297	1.00845	16.6023	2.5052	12.0038	1.79317	13.665	5.3777
AGTR1-Hs00241341_m1	Target	39.7005	0.599	38.7866	2.7132	39.5484	0.618705	40	0	40	0	40	0	18.6721	0.578531	17.8359	2.5019	16.7588	1.44161	19.24	0.565314	18.1889	0.327999	19.2614	0.160044
AGTR2-Hs00169126_m1	Target	38.2309	3.5383	37.7382	5.05763	34.9003	4.31321	40	0	40	0	40	0	17.2025	3.51664	16.7874	5.02016	12.1108	4.33805	19.24	0.565314	18.1889	0.327999	19.2614	0.160044
AGTRL1-Hs00270873_s1	Target	38.5439	2.91215	38.4688	2.19285	35.4185	3.52046	34.9575	4.69112	40	0	39.3381	1.1465	17.5156	2.91382	17.5181	2.29226	12.6289	2.78884	14.1975	4.41603	18.1889	0.327999	18.5995	1.04038
AVPR1A-Hs00176122_m1	Target	37.4509	3.48287	36.8708	5.44248	34.9612	6.40329	40	0	40	0	40	0	16.4225	3.47569	15.9201	5.56193	12.1716	6.10223	19.24	0.565314	18.1889	0.327999	19.2614	0.160044
AVPR1B-Hs00704725_s1	Target	33.6256	4.75811	36.4483	4.87946	33.5536	3.93299	30.6412	1.39731	34.5922	2.26347	37.6749	4.02719	12.5973	4.71426	15.4976	4.68547	10.764	3.75619	9.88117	1.30956	12.7811	2.24744	16.9364	3.98763
AVPR2-Hs00181055_m1	Target	35.8349	3.7842	35.6578	6.43472	32.7686	2.76625	40	0	39.6587	0.591149	37.0712	2.54039	14.8066	3.76043	14.7071	6.19612	9.97902	2.67913	19.24	0.565314	17.8476	0.839843	16.3327	2.3837
B2M-Hs99999907_m1	Selected Control	15.764	0.121192	17.0125	0.33149	18.1404	1.07886	17.4222	0.523456	17.9528	0.371539	18.1429	0.123887	-5.26435	0.13083	-3.93824	0.249941	-4.64914	0.357397	-3.33787	0.0632412	-3.8583	0.126233	-2.59563	0.0396477
BAI1-Hs00181777_m1	Target	28.1846	0.763544	28.9009	0.446809	29.7181	0.670547	25.1027	0.586163	28.4565	0.613609	25.8263	0.579063	7.15622	0.720761	7.9502	0.564163	6.92852	0.739299	4.3427	0.334476	6.64543	0.33703	5.08767	0.518459
BAI2-Hs00184657_m1	Target	32.5955	1.41352	33.5793	1.9475	34.7106	5.38491	31.9491	1.41067	31.7709	0.79118	30.0836	0.580751	11.5672	1.39558	12.6285	1.96108	11.921	5.13331	11.1891	1.39267	9.9598	0.467041	9.34503	0.624873
BAI3-Hs00184682_m1	Target	40	0	37.268	3.75518	34.0583	6.05327	40	0	32.5188	0.777521	40	0	18.9717	0.0461938	16.3172	3.97521	11.2688	6.04191	19.24	0.565314	10.7077	0.702869	19.2614	0.160044
BDKRB1-Hs00664201_s1	Target	33.0105	1.09936	38.6981	2.91118	37.8527	4.8016	32.2523	3.16214	32.3317	0.328132	39.1093	1.54268	11.9821	1.10278	17.7473	2.91235	15.0631	4.55089	11.4923	3.3855	10.5206	0.517502	18.3707	1.69809
BDKRB2-Hs00176121_m1	Target	37.4142	5.17165	38.415	3.54421	37.5071	3.25193	37.9389	3.56999	28.2701	0.109125	38.0695	3.34378	16.3858	5.14991	17.4642	3.33123	14.7176	3.48225	17.1788	3.6761	6.45903	0.244786	17.3309	3.49889
BLR1-Hs00173527_m1	Target	27.1744	1.61592	29.8109	0.986027	33.7128	5.87179	25.2455	0.7273	26.5947	0.540355	29.3494	1.88866	6.14608	1.61307	8.86014	0.890677	10.9232	5.825	4.48553	0.182656	4.78357	0.500288	8.61083	1.74694
BRS3-Hs00179951_m1	Target	40	0	40	0	38.6569	2.75885	40	0	40	0	40	0	18.9717	0.0461938	19.0493	0.284944	15.8673	2.61482	19.24	0.565314	18.1889	0.327999	19.2614	0.160044
C11ORF4-Hs00220079_m1	Target	24.0629	0.0709948	24.1666	0.282542	25.8601	0.537657	23.1711	0.676728	25.1843	0.352969	25.0961	0.03708	3.03457	0.0506407	3.21586	0.242218	3.07054	0.861705	2.4111	0.149806	3.37317	0.0281294	4.35753	0.131579
C3AR1-Hs00269693_s1	Target	21.2694	0.39773	22.3376	0.17728	24.2936	0.798034	23.9753	0.673229	24.49	0.417688	23.3562	0.01635	0.24105	0.405159	1.38684	0.109089	1.50406	1.44296	3.21527	0.127235	2.67887	0.22059	2.6177	0.172321
C5R1-Hs00356609_g1	Target	20.8382	0.209709	20.9054	0.535616	21.8118	0.790199	25.5477	0.916286	22.5737	0.3726	22.6216	0.0998691	-0.190175	0.2313	-0.04534	0.297081	-0.97774	0.470943	4.7877	0.409134	0.762533	0.183163	1.88303	0.0721713
CALCR-Hs00156229_m1	Target	32.7913	2.40594	32.8241	1.27507	35.3618	2.81761	40	0	40	0	40	0	11.763	2.39535	11.8733	1.41972	12.5722	2.21658	19.24	0.565314	18.1889	0.327999	19.2614	0.160044
CALCRL-Hs00173787_m1	Target	27.8628	0.880843	27.5156	0.287527	28.2067	1.2791	36.6533	2.93909	29.4109	0.184528	40	0	6.83442	0.859257	6.56488	0.201979	5.41714	0.605824	15.8932	2.57818	7.5997	0.14432	19.2614	0.160044
CASR-Hs00173436_m1	Target	39.9958	0.0084	36.9837	4.1943	38.5149	2.78631	40	0	40	0	40	0	18.9674	0.0428545	16.033	4.0405	15.7253	3.52032	19.24	0.565314	18.1889	0.327999	19.2614	0.160044
CCBP2-Hs00174299_m1	Target	34.1984	3.87049	32.5971	0.750772	36.9624	4.19543	35.3655	4.13221	33.3778	0.995633	32.4365	1.22889	13.17	3.82753	11.6464	0.562957	14.1728	4.72192	14.6055	3.973	11.5666	1.17652	11.6979	1.1669
CCKAR-Hs00167891_m1	Target	40	0	38.1012	3.67142	39.0791	2.05924	40	0	40	0	40	0	18.9717	0.0461938	17.1505	3.44616	16.2895	1.90944	19.24	0.565314	18.1889	0.327999	19.2614	0.160044
CCKBR-Hs00176123_m1	Target	40	0	40	0	40	0	40	0	36.2727	3.26149	40	0	18.9717	0.0461938	19.0493	0.284944	17.2105	0.848364	19.24	0.565314	14.4616	3.02555	19.2614	0.160044
CCR1-Hs00174298_m1	Target	22.7241	0.444848	22.8368	0.619179	24.3315	1.05125	22.0419	0.690491	25.0372	0.312087	25.1033	0.0655201	1.6957	0.464851	1.88602	0.47941	1.54198	0.508665	1.28183	0.17292	3.22607	0.0186433	4.36477	0.09986
CCR10-Hs00706455_s1	Target	33.2773	1.0867	34.6319	0.338762	36.9157	2.47105	38.4888	2.61753	35.4137	0.883093	31.7413	0.375747	12.249	1.05535	13.6812	0.268453	14.1262	1.78079	17.7287	2.73871	13.6025	0.722479	11.0027	0.315041
CCR2-Hs00174150_m1	Target	32.1987	1.35743	30.2171	1.52589	28.1347	0.975357	40	0	35.2086	4.19751	40	0	11.1703	1.33887	9.2663	1.75073	5.3452	1.03068	19.24	0.565314	13.3975	4.04939	19.2614	0.160044
CCR3-Hs00266213_s1	Target	30.2549	0.846682	29.735	1.33251	29.4124	1.18759	27.4447	0.826494	31.3333	0.240962	31.3109	0.802471	9.22655	0.84494	8.78418	1.1868	6.62286	0.736604	6.6847	0.579991	9.52217	0.201455	10.5723	0.672625
CCR4-Hs00747615_s1	Target	25.6625	1.30233	31.1067	1.36337	32.7262	4.46739	36.1371	6.69068	35.8449	3.65164	31.6599	0.765682	4.63413	1.323	10.1559	1.54725	9.93672	4.69998	15.3771	6.77694	14.0338	3.60692	10.9213	0.894908
CCR5-Hs00152917_m1	Target	23.9373	0.60503	24.3356	0.428212	28.5479	1.84666	25.2747	0.705059	31.6265	0.461596	35.5778	0.118911	2.90895	0.636717	3.38482	0.326376	5.75838	1.30747	4.51467	0.146899	9.81537	0.235653	14.8392	0.222496
CCR6-Hs00171121_m1	Target	29.9095	0.94668	26.2433	2.99191	30.57	0.906964	37.6981	2.73606	40	0	40	0	8.88118	0.931342	5.29254	3.21801	7.78042	0.560747	16.938	2.69227	18.1889	0.327999	19.2614	0.160044
CCR7-Hs00171054_m1	Target	24.934	1.02488	29.6997	2.80166	32.8312	1.50925	40	0	33.4823	0.908165	40	0	3.9056	1.02081	8.74894	2.97269	10.0417	1.40114	19.24	0.565314	11.6712	0.584536	19.2614	0.160044
CCR8-Hs00174764_m1	Target	28.3985	1.11575	37.6844	3.16258	38.6882	2.93332	40	0	40	0	40	0	7.37018	1.11645	16.7336	3.31989	15.8986	2.72987	19.24	0.565314	18.1889	0.327999	19.2614	0.160044
CCR9-Hs00258535_m1	Target	35.7968	4.8919	37.0235	4.07574	35.6284	2.64941	31.8004	0.41568	40	0	40	0	14.7684	4.87204	16.0728	3.8936	12.8389	1.95586	11.0404	0.490047	18.1889	0.327999	19.2614	0.160044
CCRL1-Hs00356608_g1	Target	29.571	0.427393	28.4238	2.51919	28.9439	3.28993	27.7919	0.565	27.9921	0.532403	29.4252	0.422091	8.5427	0.426109	7.47304	2.28861	6.15442	2.7307	7.03193	0.335651	6.18097	0.20926	8.68657	0.306339
CCRL2-Hs00243702_s1	Target	22.525	0.578579	23.4356	0.493853	26.6849	2.48928	24.423	0.533796	26.0029	0.276933	26.0987	0.220623	1.49662	0.624502	2.48492	0.503088	3.8954	1.94173	3.663	0.368516	4.19173	0.116744	5.36013	0.320884
CD97-Hs00173542_m1	Target	21.7684	0.923535	22.3821	0.528681	22.2464	0.81867	23.0655	0.599508	23.9304	0.342005	22.0073	0.109722	0.740075	0.967539	1.43138	0.322204	-0.5431	0.394931	2.30543	0.227461	2.11927	0.309615	1.26867	0.0708509
CELSR1-Hs00183906_m1	Target	28.0027	1.23682	25.978	1.00258	31.7503	1.48565	28.4632	0.73501	25.1176	0.291306	29.6932	0.359414	6.97438	1.19783	5.02724	0.762478	8.9608	1.14837	7.70317	0.233583	3.30647	0.0835552	8.9546	0.301049
CELSR2-Hs00154903_m1	Target	32.0603	1.96593	29.3348	0.918556	30.6447	0.505806	32.6317	0.611428	32.2754	0.687287	30.1385	0.155268	11.0319	1.95044	8.38406	0.724532	7.85512	0.835079	11.8717	0.272087	10.4642	0.366527	9.39997	0.268057
CELSR3-Hs00609783_m1	Target	29.1599	0.392869	30.4392	0.219617	30.6978	0.531755	29.8761	0.883026	30.0152	0.470439	27.2739	0.0719212	8.13155	0.410632	9.48848	0.231601	7.90826	0.402724	9.1161	0.343816	8.20407	0.1528	6.53537	0.231931
CHRM1-Hs00265195_s1	Target	38.4306	3.1387	36.7501	5.12192	37.0582	4.18818	34.8981	4.97474	36.7861	2.79166	37.6452	2.82415	17.4023	3.18184	15.7993	4.89687	14.2686	3.703	14.138	4.75187	14.975	3.11065	16.9067	2.96272
CHRM2-Hs00265208_s1	Target	37.495	3.97726	39.7561	0.545422	37.9319	4.62446	35.9294	6.3453	40	0	40	0	16.4667	3.9743	18.8054	0.375236	15.1423	4.37652	15.1694	6.46881	18.1889	0.327999	19.2614	0.160044
CHRM3-Hs00265216_s1	Target	32.3786	5.09518	38.4971	2.07454	33.6445	3.87369	36.6478	5.80618	24.7043	0.416988	38.9929	1.74429	11.3503	5.11578	17.5463	2.2103	10.8549	3.06973	15.8878	5.89594	2.89317	0.122046	18.2544	1.63588
CHRM4-Hs00265219_s1	Target	32.1756	2.51485	30.7864	1.10488	30.138	0.811842	27.8093	0.730237	28.5756	0.155357	29.8596	0.200488	11.1473	2.5297	9.83568	0.944966	7.34846	0.678025	7.04927	0.481405	6.7645	0.172793	9.12103	0.158724
CHRM5-Hs00255278_s1	Target	30.0126	0.607217	32.231	1.42047	30.7647	1.196	28.7153	0.662994	29.3006	0.566463	28.5001	0.420214	8.98425	0.630375	11.2803	1.49818	7.97514	0.734921	7.95523	0.308294	7.48947	0.518414	7.76147	0.459816
CMKLR1-Hs00356604_m1	Target	24.2272	0.760076	25.8361	0.992907	27.3856	1.35139	24.2391	0.517323	28.2069	0.254505	40	0	3.19883	0.74564	4.88544	1.18806	4.59602	0.605517	3.47907	0.0613727	6.39573	0.156474	19.2614	0.160044
CNR1-Hs00275634_m1	Target	33.4425	2.18291	35.7761	3.864	37.0817	6.52556	30.4059	0.758716	24.397	0.285818	31.1389	0.531808	12.4142	2.19766	14.8254	3.87618	14.2921	6.25603	9.6459	0.380902	2.5859	0.243493	10.4003	0.591658
CNR2-Hs00361490_m1	Target	30.2666	1.17325	32.7731	4.97178	30.4761	2.13249	25.4782	0.770079	40	0	31.9742	1.2921	9.23822	1.16521	11.8224	4.81971	7.68658	1.80326	4.71817	0.281774	18.1889	0.327999	11.2357	1.13269
CRHR1-Hs00366363_m1	Target	39.0291	1.94185	38.21	3.45768	37.424	3.83029	40	0	40	0	40	0	18.0007	1.92038	17.2593	3.23257	14.6345	4.44539	19.24	0.565314	18.1889	0.327999	19.2614	0.160044
CRHR2-Hs00266401_m1	Target	36.2888	4.28565	30.5654	1.10081	38.8758	2.51379	29.9208	1.12791	33.0103	0.875524	40	0	15.2605	4.2677	9.6146	1.07397	16.0863	2.3312	9.1608	0.69131	11.1992	0.708399	19.2614	0.160044
CX3CR1-Hs00365842_m1	Target	28.2268	2.67605	25.6138	1.49276	23.0041	0.436799	26.2584	0.813388	24.8784	0.311631	27.5535	0.0496514	7.19848	2.66524	4.66302	1.71202	0.2146	0.450494	5.49837	0.432538	3.06727	0.0667424	6.81493	0.1292
CXCR3-Hs00171041_m1	Target	28.686	0.397765	32.3523	1.70563	36.1086	3.97611	28.957	0.991041	33.9022	0.873474	38.1465	3.2103	7.65762	0.379238	11.4015	1.46235	13.3191	3.88376	8.19693	0.642525	12.0911	0.630723	17.408	3.10001
CXCR4-Hs00237052_m1	Target	22.802	1.26118	23.5151	0.752556	22.7645	0.705892	24.0215	0.447204	25.8665	0.941326	20.695	0.145553	1.77368	1.23402	2.56438	0.831746	-0.02502	1.25338	3.2615	0.118777	4.05537	1.05585	-0.0435333	0.0787141
CXCR6-Hs00174843_m1	Target	26.065	1.7278	38.1056	2.6979	37.8983	2.8688	40	0	40	0	40	0	5.03662	1.72851	17.1548	2.67281	15.1087	2.51264	19.24	0.565314	18.1889	0.327999	19.2614	0.160044
CYSLTR1-Hs00272624_s1	Target	26.3914	0.90343	24.6825	1.63053	25.8726	2.42598	22.5616	0.544417	22.6947	0.262301	22.7328	0.428457	5.36303	0.89604	3.73172	1.42978	3.0831	1.69765	1.80157	0.227878	0.883567	0.252512	1.9942	0.366787
CYSLTR2-Hs00252658_s1	Target	26.5373	1.42923	28.42	0.409074	26.4377	0.999745	33.6206	3.52773	32.3323	0.729402	32.7035	0.394877	5.5089	1.43949	7.46926	0.461162	3.64816	0.583358	12.8606	3.57407	10.5211	0.444312	11.9649	0.331285
DRD1-Hs00265245_s1	Target	38.4227	3.15455	37.5362	3.37431	36.9325	4.64815	36.3274	6.36113	40	0	40	0	17.3944	3.15619	16.5855	3.19561	14.1429	4.74497	15.5674	6.44858	18.1889	0.327999	19.2614	0.160044
DRD2-Hs00241436_m1	Target	36.4171	3.94987	31.918	1.20141	38.2973	1.494	33.6286	0.670069	40	0	40	0	15.3887	3.98561	10.9673	1.20278	15.5078	1.76368	12.8686	1.23283	18.1889	0.327999	19.2614	0.160044
DRD3-Hs00168045_m1	Target	37.1225	3.32408	38.999	1.70384	38.1996	4.02573	38.7548	2.15675	40	0	39.4025	1.0349	16.0941	3.30611	18.0483	1.84162	15.4101	4.77782	17.9948	1.65426	18.1889	0.327999	18.6639	1.00433
DRD4-Hs00609526_m1	Target	38.0043	3.21656	36.8115	4.73398	37.8415	2.96371	37.2779	3.44852	40	0	40	0	16.976	3.18897	15.8607	4.63622	15.052	3.03018	16.5178	3.01449	18.1889	0.327999	19.2614	0.160044
DRD5-Hs00361234_s1	Target	29.2986	1.54085	29.8344	0.617277	29.5613	1.44965	33.2776	6.66156	31.0655	0.715416	30.1092	0.521961	8.2703	1.52703	8.88372	0.575215	6.7718	1.40391	12.5175	6.44742	9.25437	0.493542	9.37067	0.556924
EBI2-Hs00270639_s1	Target	24.2904	0.702248	23.7077	0.85014	24.5619	2.30407	25.5868	0.5722	24.1459	0.371786	23.6242	0.0840714	3.26202	0.664311	2.75692	1.05292	1.77234	1.74602	4.82677	0.170751	2.33477	0.0449561	2.88563	0.242691
EDG1-Hs00173499_m1	Target	26.5921	1.52885	27.4635	1.28702	32.2331	1.16301	31.4235	0.881191	26.35	0.402103	40	0	5.56372	1.51259	6.51284	1.51822	9.44352	1.06406	10.6634	0.648668	4.5389	0.0988856	19.2614	0.160044
EDG2-Hs00173500_m1	Target	23.6063	0.384402	24.9554	0.361803	26.3471	0.943226	28.5219	1.01498	25.3984	0.292451	30.2127	0.276968	2.57793	0.38465	4.00462	0.144899	3.5576	0.340439	7.76187	0.543995	3.58727	0.0667401	9.4741	0.126394
EDG3-Hs00245464_s1	Target	28.3276	0.99716	29.1249	1.71818	24.2922	0.766158	28.5965	1.03931	26.4756	0.365357	25.4831	0.33323	7.29922	1.02777	8.17422	1.51707	1.50268	0.332269	7.83653	0.595925	4.66447	0.0544809	4.7445	0.321868
EDG4-Hs00173704_m1	Target	24.9134	0.394083	24.6382	0.419844	24.7257	0.874519	23.8557	0.693406	23.3338	0.482841	22.9644	0.138803	3.88497	0.3887	3.68752	0.400133	1.93616	0.245506	3.09567	0.130817	1.5227	0.184224	2.22587	0.0258274
EDG5-Hs00244677_s1*	Target	*	*	23.0609	0.382114	28.4047	0.484728	23.4312	0.672046	*	*	*	*	*	*	2.11024	0.332024	5.61518	0.391872	2.67117	0.124917	*	*	*	*
EDG6-Hs00269446_s1	Target	26.766	0.605863	28.2549	0.769984	26.1488	0.719958	26.6979	0.810306	36.5114	1.16836	28.2022	0.279589	5.7376	0.601492	7.30416	0.767165	3.3593	0.761911	5.9379	0.260683	14.7003	1.19539	7.46367	0.437729
EDG7-Hs00173857_m1	Target	27.6427	1.16698	31.0923	0.790927	35.6298	4.20895	40	0	29.9097	0.669551	40	0	6.6143	1.13863	10.1415	0.731309	12.8403	4.62666	19.24	0.565314	8.0986	0.356013	19.2614	0.160044
EDG8-Hs00258220_s1	Target	27.1181	1.84318	36.995	4.12096	34.5944	5.07531	28.9373	0.591552	31.6166	0.411443	33.68	0.113804	6.0898	1.83142	16.0443	3.93111	11.8048	5.2317	8.1773	0.147536	9.80547	0.216585	12.9414	0.273621
EDNRA-Hs00609865_m1	Target	34.9879	3.37923	37.9143	3.58928	36.9745	4.93848	40	0	31.7747	0.40137	40	0	13.9596	3.3756	16.9635	3.36498	14.1849	5.61118	19.24	0.565314	9.96357	0.215047	19.2614	0.160044
EDNRB-Hs00240747_m1	Target	30.1529	2.36654	29.2854	0.932603	31.2843	0.681612	38.6264	2.37914	28.0955	0.341108	40	0	9.1245	2.34226	8.33464	0.803174	8.4948	0.664466	17.8664	1.87487	6.28443	0.0220838	19.2614	0.160044
ELTD1-Hs00223377_m1	Target	37.8996	2.68942	35.1195	7.44899	37.4258	3.60202	40	0	40	0	40	0	16.8712	2.65476	14.1688	7.25656	14.6363	4.1308	19.24	0.565314	18.1889	0.327999	19.2614	0.160044
EMR1-Hs00173562_m1	Target	24.5426	1.34138	28.1817	1.37735	24.7724	1.04522	31.9175	0.30057	31.6734	0.613105	25.7716	0.188826	3.51427	1.30786	7.23092	1.15578	1.98292	0.522157	11.1574	0.568587	9.86233	0.294409	5.033	0.0518567
EMR2-Hs00203752_m1	Target	24.0506	0.654795	24.3034	0.72593	24.5836	0.745786	22.26	0.638824	23.6917	0.303598	25.5841	0.261302	3.02228	0.63723	3.3527	0.500096	1.79402	0.35635	1.49997	0.106067	1.88057	0.183012	4.8455	0.104764
EMR3-Hs00261470_m1	Target	23.3731	0.615118	24.9473	1.44467	24.8497	0.724378	27.5148	0.482732	33.3162	1.18486	28.6695	0.222504	2.3448	0.59409	3.99658	1.17056	2.0602	0.54584	6.75483	0.156856	11.5051	0.858519	7.93097	0.300969
F2R-Hs00169258_m1	Target	31.4849	1.1286	33.9024	1.36372	35.8139	1.42094	39.9211	0.136601	25.7186	1.02959	27.8061	0.53156	10.4565	1.11019	12.9516	1.27873	13.0243	1.63486	19.1611	0.443533	3.90753	0.787115	7.06753	0.59167
F2RL1-Hs00173741_m1	Target	29.4243	1.22677	30.8635	6.40324	26.4543	1.25192	40	0	32.4736	0.0901007	40	0	8.39595	1.1984	9.91272	6.30027	3.6648	0.657926	19.24	0.565314	10.6625	0.324695	19.2614	0.160044
F2RL2-Hs00187982_m1	Target	34.4478	3.85047	35.7465	3.37937	39.1166	1.97525	40	0	40	0	40	0	13.4194	3.85766	14.7958	3.57359	16.3271	1.83326	19.24	0.565314	18.1889	0.327999	19.2614	0.160044
F2RL3-Hs00559732_m1	Target	34.6407	2.41016	35.6771	2.53845	36.9847	2.98101	35.6602	3.72568	35.7984	5.27169	35.4451	2.20792	13.6124	2.37546	14.7264	2.38389	14.1951	3.2013	14.9002	3.51184	13.9873	5.53866	14.7065	2.07637
FKSG83-Hs00259293_s1	Target	38.3206	3.35875	40	0	37.6817	5.18388	36.0361	6.86562	40	0	40	0	17.2923	3.36037	19.0493	0.284944	14.8922	4.92786	15.2761	6.95135	18.1889	0.327999	19.2614	0.160044
FPR1-Hs00181830_m1	Target	23.6924	0.861876	26.8462	0.8937	22.5472	0.979341	27.3821	0.603892	31.4308	0.395825	29.2902	0.778813	2.664	0.82099	5.8954	0.817253	-0.2423	0.291319	6.6221	0.163692	9.61963	0.710201	8.5516	0.620094
FPRL1-Hs00265954_m1	Target	25.9535	0.795007	30.8916	1.35444	26.1158	0.980287	35.6151	3.82927	30.823	0.742502	28.1817	0.225544	4.92518	0.803294	9.94086	1.09156	3.32634	0.234101	14.8551	3.73515	9.01187	0.434677	7.4431	0.0735876
FPRL2-Hs00266666_s1	Target	21.0543	0.33287	22.4105	0.484089	27.1232	1.47725	29.588	0.5545	31.039	0.195085	32.0915	0.651152	0.025925	0.294452	1.45976	0.668263	4.33372	0.958596	8.82797	0.545398	9.2279	0.151592	11.3529	0.712937
FSHR-Hs00174865_m1	Target	40	0	37.6204	5.32104	39.0057	2.22328	40	0	40	0	40	0	18.9717	0.0461938	16.6696	5.10629	16.2162	2.98694	19.24	0.565314	18.1889	0.327999	19.2614	0.160044
FY-Hs00266671_s1	Target	34.6596	2.55789	34.7311	4.79682	37.366	4.00091	35.2474	5.11987	40	0	40	0	13.6313	2.56512	13.7804	4.91659	14.5764	4.10611	14.4874	4.9829	18.1889	0.327999	19.2614	0.160044
FZD1-Hs00268943_s1	Target	26.357	0.460517	25.4068	0.944964	25.6147	0.564412	25.7107	0.652115	24.8106	0.515336	25.8898	0.314476	5.32865	0.500746	4.45604	1.1373	2.8252	0.306811	4.95077	0.284871	2.99947	0.246834	5.15127	0.331052
FZD10-Hs00273077_s1	Target	38.6779	2.6442	38.0836	4.28525	38.4876	3.38192	36.7121	5.69481	40	0	40	0	17.6496	2.6873	17.1329	4.0713	15.698	3.16211	15.9521	5.78508	18.1889	0.327999	19.2614	0.160044
FZD2-Hs00361432_s1	Target	28.6046	2.26875	26.7536	1.8844	26.563	0.527421	35.9267	4.06111	29.0224	0.058446	27.0594	0.255069	7.57622	2.2343	5.80286	1.73995	3.77346	0.660202	15.1667	4.42217	7.2113	0.295744	6.32083	0.284586
FZD3-Hs00184043_m1	Target	31.6855	1.57767	30.1299	0.797855	31.4709	0.907778	31.8152	0.59939	27.4239	0.193217	40	0	10.6571	1.53609	9.17914	0.637073	8.68132	0.747183	11.0551	0.282813	5.61277	0.14817	19.2614	0.160044
FZD4-Hs00201853_m1	Target	28.4981	1.01581	29.4461	0.515879	38.8785	2.50784	34.9015	4.44209	28.1788	0.210165	28.9187	0.486184	7.4697	1.00833	8.49538	0.407387	16.0889	2.25073	14.1414	3.96324	6.36767	0.147642	8.18017	0.457369
FZD5-Hs00361869_g1	Target	25.705	0.59618	25.5758	0.561156	27.5759	0.282621	27.7802	0.518126	25.4003	0.319663	24.8864	0.470359	4.67665	0.602514	4.62504	0.464142	4.78634	0.823754	7.02017	0.134299	3.58917	0.0508262	4.14787	0.323307
FZD6-Hs00171574_m1	Target	28.831	0.996186	29.6289	0.934418	30.5905	0.941649	29.7534	0.533846	24.2475	0.28657	40	0	7.80258	0.966093	8.67816	0.797404	7.8009	0.870858	8.99337	0.524602	2.43633	0.108913	19.2614	0.160044
FZD7-Hs00275833_s1	Target	26.4858	0.442008	27.8907	0.774696	31.3405	1.90681	26.5765	0.67923	23.5779	0.312399	26.1564	0.270618	5.4575	0.433834	6.94002	0.635482	8.551	1.23594	5.8165	0.25204	1.7668	0.0825075	5.4178	0.130384
FZD8-Hs00259040_s1	Target	29.7428	0.587348	31.0889	1.72899	34.333	2.32613	32.6582	1.52997	30.353	0.407764	40	0	8.71443	0.597763	10.1381	1.5005	11.5435	2.13814	11.8981	1.30667	8.54187	0.728117	19.2614	0.160044
FZD9-Hs00268954_s1	Target	33.4554	0.776626	33.3657	0.689506	32.8033	1.32669	33.2852	2.26859	29.5966	0.388884	30.6955	0.35716	12.4271	0.782333	12.4149	0.833089	10.0138	1.15012	12.5252	2.05439	7.78553	0.0976276	9.95697	0.26347
GABBR1-Hs00559488_m1	Target	25.7524	0.903652	24.8825	0.73823	22.8891	0.778332	35.5073	3.89233	31.2689	0.240995	23.6727	0.264619	4.72403	0.88203	3.93178	0.839128	0.09956	0.133131	14.7473	4.41035	9.4578	0.116113	2.93417	0.11269
GALR1-Hs00175668_m1	Target	40	0	39.0404	2.14582	37.6874	5.17109	32.6592	1.13629	32.5663	0.237549	40	0	18.9717	0.0461938	18.0896	2.11922	14.8979	4.91528	11.8992	1.0603	10.7552	0.385892	19.2614	0.160044
GALR2-Hs00605839_m1	Target	33.1606	0.66186	34.027	2.39456	31.6085	2.75679	32.4231	1.60317	31.0446	0.113613	32.743	0.517155	12.1322	0.674235	13.0762	2.24044	8.81896	2.74065	11.6631	1.03883	9.23343	0.441008	12.0045	0.596491
GALR3-Hs00358572_m1	Target	40	0	38.8447	2.58337	37.3301	3.82894	40	0	40	0	34.6216	0.0486863	18.9717	0.0461938	17.8939	2.58626	14.5405	4.40064	19.24	0.565314	18.1889	0.327999	13.883	0.111808
GAPDH-Hs99999905_m1	Selected Control	19.6931	0.49095	19.0326	0.517845	20.5109	1.16743	17.8033	0.694127	21.1739	0.379133	18.7372	0.0783793	-1.3352	0.480681	-1.9182	0.401319	-2.27868	0.366609	-2.95677	0.149236	-0.637267	0.23813	-2.00133	0.109404
GCGR-Hs00164710_m1	Target	35.7056	4.58988	30.1268	1.967	36.7465	4.45716	37.9337	3.57899	40	0	38.3149	2.91874	14.6772	4.57174	9.17608	2.10828	13.9569	4.87624	17.1736	3.685	18.1889	0.327999	17.5763	2.88038
GCNT2-Hs00171322_m1	Target	34.9481	0.962314	35.0539	2.92426	35.0869	1.52472	37.1029	2.5188	35.6179	1.19936	38.9792	0.90815	13.9197	0.99477	14.1032	2.79647	12.2974	1.41559	16.3428	3.06004	13.8068	0.989543	18.2406	0.748162
GHRHR-Hs00173457_m1	Target	40	0	38.5432	3.25741	37.0474	4.97507	40	0	40	0	40	0	18.9717	0.0461938	17.5925	3.04486	14.2579	4.93408	19.24	0.565314	18.1889	0.327999	19.2614	0.160044
GHSR-Hs00269780_s1	Target	32.165	0.39651	38.8259	2.62541	36.8441	4.50114	31.5051	2.1189	29.9656	0.477766	32.4166	0.254018	11.1367	0.435536	17.8751	2.62805	14.0546	4.01284	10.7451	1.96175	8.15443	0.701643	11.678	0.403698
GIPR-Hs00164732_m1	Target	30.0365	0.936456	29.237	1.09771	31.3925	0.685182	30.4944	0.786053	29.6166	0.483522	28.8592	0.131511	9.0082	0.92817	8.28624	1.07332	8.60296	1.11204	9.73433	0.578322	7.8055	0.199901	8.1206	0.0340312
GLP1R-Hs00157705_m1	Target	38.8503	2.2995	35.6546	0.864866	40	0	40	0	40	0	40	0	17.8219	2.30126	14.7038	1.07635	17.2105	0.848364	19.24	0.565314	18.1889	0.327999	19.2614	0.160044
GLP2R-Hs00173688_m1	Target	40	0	39.9166	0.186578	39.1304	1.16414	40	0	40	0	40	0	18.9717	0.0461938	18.9658	0.186123	16.3409	1.63769	19.24	0.565314	18.1889	0.327999	19.2614	0.160044
GNRHR-Hs00171248_m1	Target	40	0	38.6195	1.9097	37.2137	3.92366	40	0	40	0	38.116	3.26318	18.9717	0.0461938	17.6688	1.6899	14.4241	4.11947	19.24	0.565314	18.1889	0.327999	17.3774	3.15286
GNRHR2-Hs00369692_m1	Target	40	0	38.0006	2.77717	38.5389	1.56756	40	0	40	0	40	0	18.9717	0.0461938	17.0499	2.75729	15.7494	1.6351	19.24	0.565314	18.1889	0.327999	19.2614	0.160044
GPBAR1-Hs00544894_m1	Target	26.6166	1.34771	27.2753	0.647298	24.2372	1.07982	40	0	37.6717	4.03268	39.0329	1.67512	5.5882	1.35176	6.32454	0.835458	1.44764	0.49714	19.24	0.565314	15.8606	4.15728	18.2943	1.8305
GPR-Hs00173855_m1	Target	31.5838	1.07275	30.0573	0.934145	35.2682	4.34135	30.7525	0.442434	28.9518	0.381844	28.4368	0.303154	10.5555	1.03499	9.10654	0.714736	12.4786	4.00003	9.9925	0.427958	7.14073	0.166476	7.69823	0.180473
GPR1-Hs00270990_s1	Target	36.3294	2.47161	38.7645	2.76266	36.1526	3.77201	34.7529	2.4811	33.4467	0.468437	36.3094	3.44	15.3011	2.48871	17.8137	2.76458	13.3631	3.10139	13.9929	2.69303	11.6356	0.425755	15.5709	3.28123
GPR10-Hs00244685_s1	Target	39.3858	0.827433	39.7329	0.597164	38.7032	2.89982	38.3618	2.8375	40	0	40	0	18.3575	0.820722	18.7822	0.421175	15.9136	2.69781	17.6017	2.95434	18.1889	0.327999	19.2614	0.160044
GPR101-Hs00369662_s1	Target	36.7174	3.81325	37.8173	3.01983	38.1704	4.0912	34.5577	5.20161	40	0	33.2617	1.03082	15.689	3.79734	16.8665	2.98905	15.3808	3.85312	13.7977	4.95611	18.1889	0.327999	12.5231	1.13073
GPR103-Hs00326483_m1	Target	38.6906	2.6189	39.4034	1.33413	39.4376	1.25756	40	0	38.3812	2.80379	40	0	17.6622	2.62061	18.4526	1.13102	16.6481	2.03585	19.24	0.565314	16.5701	2.48122	19.2614	0.160044
GPR110-Hs00542396_m1	Target	28.3519	1.34485	38.4649	3.43268	39.8564	0.321099	40	0	40	0	38.2771	2.98421	7.3235	1.32787	17.5141	3.21982	17.0669	1.13734	19.24	0.565314	18.1889	0.327999	17.5385	3.1394
GPR111-Hs00984115_m1	Target	38.7741	2.4517	37.7662	4.99488	39.887	0.252586	40	0	33.3952	0.337632	40	0	17.7458	2.42953	16.8155	4.78032	17.0975	0.788866	19.24	0.565314	11.5841	0.664595	19.2614	0.160044
GPR112-Hs00542361_m1	Target	40	0	38.5186	3.31247	40	0	40	0	40	0	40	0	18.9717	0.0461938	17.5679	3.09986	17.2105	0.848364	19.24	0.565314	18.1889	0.327999	19.2614	0.160044
GPR113-Hs00542378_m1	Target	31.1329	0.633289	31.1805	0.794113	31.9594	0.772525	31.5212	0.524082	30.3971	0.549145	29.7719	0.0815596	10.1045	0.671965	10.2297	0.659879	9.16982	0.402637	10.7612	0.757137	8.58593	0.226368	9.03337	0.223947
GPR114-Hs00542381_m1	Target	33.5465	2.19171	35.6675	4.0194	38.0727	2.89346	28.1924	0.691348	38.3037	2.93814	38.4136	2.74778	12.5181	2.21128	14.7167	3.99736	15.2832	2.59909	7.4324	0.309379	16.4926	2.61553	17.675	2.90294
GPR115-Hs00402607_m1	Target	32.2411	1.91108	33.7709	1.57696	37.362	5.8987	34.8214	4.59205	32.6376	0.545215	38.491	2.61361	11.2128	1.91018	12.8201	1.42842	14.5725	6.64541	14.0614	4.24104	10.8265	0.258395	17.7524	2.50388
GPR116-Hs00391810_m1	Target	30.5313	1.49572	39.4904	1.13941	38.8225	2.02601	40	0	40	0	38.2474	3.03553	9.50292	1.45916	18.5397	0.939456	16.033	2.74713	19.24	0.565314	18.1889	0.327999	17.5089	2.99702
GPR119-Hs02825719_s1*	Target	38.5622	2.8755	*	*	*	*	*	*	33.7589	0.469018	34.5541	0.233031	17.5339	2.87717	*	*	*	*	*	*	11.9477	0.767535	13.8155	0.378341
GPR12-Hs00271037_s1	Target	36.9122	3.56812	36.4342	5.13686	37.7785	4.96743	36.2621	6.47423	40	0	37.4975	4.3344	15.8838	3.55	15.4834	4.92073	14.989	4.71431	15.5021	6.56126	18.1889	0.327999	16.759	4.22356
GPR120-Hs00664157_s1	Target	23.6516	0.838507	23.8913	0.318119	28.3499	1.20532	25.0802	0.505479	31.6588	0.360031	36.8808	3.07038	2.62323	0.804626	2.94054	0.131341	5.56036	0.556399	4.3202	0.0683719	9.84763	0.686766	16.1422	2.95526
GPR123-Hs00287219_m1	Target	36.7544	3.76685	40	0	40	0	40	0	40	0	40	0	15.7261	3.74791	19.0493	0.284944	17.2105	0.848364	19.24	0.565314	18.1889	0.327999	19.2614	0.160044
GPR124-Hs00262150_m1	Target	28.1675	1.35844	28.9032	0.678376	26.0476	0.703108	27.9191	0.661705	25.3607	0.220987	20.9993	0.195966	7.13917	1.33667	7.95248	0.847632	3.2581	0.390734	7.1591	0.29879	3.54963	0.127347	0.260767	0.0772253
GPR125-Hs00377140_m1	Target	31.1872	0.893885	29.2832	0.437435	32.0111	1.3636	28.8982	0.883758	26.3194	0.16263	26.359	0.242144	10.1589	0.853115	8.33246	0.334542	9.22152	0.765055	8.13813	0.330228	4.50823	0.218183	5.62037	0.092772
GPR126-Hs00607475_m1	Target	31.2563	1.11791	28.1546	0.907781	29.4735	1.58201	28.0401	0.953313	30.2779	0.41135	37.6865	4.00716	10.2279	1.08575	7.2039	0.966933	6.6839	0.991487	7.28007	0.408129	8.46677	0.264083	16.9479	3.89644
GPR128-Hs00262184_m1	Target	40	0	37.6068	5.35145	37.8655	4.77289	40	0	40	0	40	0	18.9717	0.0461938	16.656	5.13664	15.076	5.5224	19.24	0.565314	18.1889	0.327999	19.2614	0.160044
GPR133-Hs00609012_m1	Target	34.8374	2.28094	33.6888	1.69787	31.806	1.03561	30.0981	0.474871	36.4308	3.09615	36.5611	2.98329	13.8091	2.23556	12.7381	1.67186	9.01646	0.478433	9.33813	0.261566	14.6197	2.9807	15.8225	3.03856
GPR135-Hs00254758_s1	Target	28.7574	0.82359	28.8603	0.31954	28.9107	1.22673	27.2601	0.602948	28.8613	0.266585	27.2891	0.470417	7.72905	0.806265	7.90962	0.58646	6.1212	0.611767	6.50007	0.116915	7.0502	0.0658185	6.55057	0.445182
GPR141-Hs00704255_s1	Target	26.4232	1.27889	24.2001	0.307001	24.3874	1.12035	29.6586	1.23983	31.1961	0.227838	28.1624	0.285272	5.3948	1.26075	3.24932	0.372044	1.59788	0.435926	8.89863	1.23274	9.38503	0.106052	7.42383	0.196363
GPR142-Hs00664166_s1	Target	34.7978	2.19754	37.7888	3.08754	34.4648	3.59888	31.6733	0.55338	35.0838	4.35612	34.2754	1.38464	13.7695	2.22048	16.8381	3.05802	11.6753	2.92777	10.9133	0.889146	13.2727	4.10255	13.5368	1.54462
GPR143-Hs00173432_m1	Target	36.7524	3.79306	28.7297	1.02931	40	0	37.7645	3.87206	31.9724	0.344142	30.5613	0.420141	15.7241	3.77351	7.77898	0.945522	17.2105	0.848364	17.0044	3.97495	10.1613	0.218947	9.8227	0.557494
GPR145-Hs00261272_m1	Target	40	0	37.5392	5.50252	39.0948	2.02418	40	0	40	0	40	0	18.9717	0.0461938	16.5885	5.28766	16.3052	2.79004	19.24	0.565314	18.1889	0.327999	19.2614	0.160044
GPR146-Hs00298904_s1	Target	29.8719	1.01347	28.4789	0.510588	31.8171	1.20352	29.1856	0.494762	28.1295	0.445723	27.3093	0.136559	8.8436	1.01015	7.52816	0.395333	9.02762	0.652533	8.42563	0.0710417	6.31833	0.152012	6.57073	0.245102
GPR147-Hs00223340_m1	Target	32.9058	1.72783	36.3804	3.49991	38.7534	2.78748	40	0	40	0	40	0	11.8774	1.71181	15.4297	3.72885	15.9639	3.11836	19.24	0.565314	18.1889	0.327999	19.2614	0.160044
GPR148-Hs00664089_s1	Target	38.6017	2.7966	39.1398	1.92342	38.0198	4.42786	33.5292	3.69486	40	0	40	0	17.5734	2.79828	18.1891	1.93169	15.2303	4.18327	12.7692	3.69252	18.1889	0.327999	19.2614	0.160044
GPR15-Hs00271044_s1	Target	30.3861	1.08521	36.3156	3.36423	36.3606	4.1915	32.0743	3.18939	36.3428	3.17049	29.2883	0.148411	9.3577	1.129	15.3649	3.34208	13.571	4.28251	11.3143	3.04239	14.5316	3.05854	8.54973	0.0655059
GPR150-Hs00664049_s1	Target	31.6335	1.21945	30.4322	0.928425	37.3902	1.70457	35.97	1.51203	31.4114	0.802971	39.5439	0.420864	10.6052	1.22966	9.48144	0.757602	14.6007	2.04557	15.21	1.04137	9.6003	0.537272	18.8053	0.508366
GPR152-Hs00664016_s1	Target	31.4763	0.755905	34.1489	3.39157	31.6791	1.03603	32.0593	1.76315	32.1769	0.26772	32.6715	0.404	10.448	0.728631	13.1981	3.33891	8.88956	0.471455	11.2993	1.83949	10.3658	0.257402	11.9329	0.545485
GPR153-Hs00664129_s1	Target	23.4351	0.405929	24.3204	0.382998	28.3206	1.0192	24.5896	0.597172	24.6708	0.245581	23.1846	0.316207	2.40675	0.434068	3.36962	0.383796	5.53104	0.646758	3.82953	0.225055	2.85963	0.124221	2.446	0.205912
GPR160-Hs00205115_m1	Target	25.5293	0.911617	25.783	0.577604	25.3309	1.33969	25.6605	0.580417	26.5779	0.43234	24.1798	0.19325	4.50095	0.8886	4.83222	0.328447	2.54136	0.586287	4.9004	0.0703896	4.7668	0.105664	3.44127	0.0522065
GPR161-Hs00201276_m1	Target	27.5852	0.582212	28.2672	0.374256	32.0415	1.03411	32.8559	1.17671	31.0935	0.271143	31.1161	0.773191	6.55682	0.578924	7.31646	0.543356	9.25204	0.326109	12.0959	0.848388	9.28243	0.141127	10.3775	0.648192
GPR17-Hs00171137_m1	Target	39.2359	1.52815	37.3217	5.98882	38.6532	1.84523	36.5952	3.3645	38.5446	2.52083	37.5254	4.28619	18.2076	1.5068	16.371	5.77369	15.8637	2.33532	15.8352	3.61786	16.7335	2.74244	16.7868	4.17542
GPR171-Hs00664328_s1	Target	25.5247	1.13393	29.2389	2.65669	29.9195	0.942822	30.6729	2.62732	28.0638	0.616082	28.1516	0.16037	4.49638	1.12845	8.2881	2.86736	7.12994	0.743934	9.91283	2.45811	6.25273	0.488301	7.41297	0.256425
GPR173-Hs00255846_s1	Target	32.2825	1.24688	34.6308	3.04008	30.7449	1.55594	34.3283	5.38281	40	0	40	0	11.2542	1.22643	13.68	2.82886	7.95534	0.90002	13.5683	5.12849	18.1889	0.327999	19.2614	0.160044
GPR174-Hs00261404_s1	Target	26.8749	1.35712	32.1477	1.2148	31.6693	1.38793	28.7871	0.24155	40	0	40	0	5.8465	1.34294	11.197	1.32037	8.87972	0.998753	8.02707	0.380098	18.1889	0.327999	19.2614	0.160044
GPR18-Hs00245542_m1	Target	28.9042	1.18952	32.5563	2.15836	30.2221	0.599658	34.009	0.660939	29.2775	0.515946	28.8277	0.937978	7.87585	1.15173	11.6055	2.02667	7.43262	1.30693	13.249	0.500126	7.46633	0.385478	8.08913	0.81349
GPR19-Hs00272049_s1	Target	30.9459	2.44571	30.9699	0.639165	35.4155	4.37867	33.9835	5.36146	32.9678	0.584844	28.5244	0.0798174	9.9175	2.46711	10.0191	0.747039	12.626	4.3176	13.2235	5.01699	11.1566	0.320989	7.78583	0.210595
GPR20-Hs00271049_s1	Target	39.876	0.2481	38.3331	2.28742	32.3605	1.01626	32.9173	1.81051	34.3359	1.06846	37.3447	2.30077	18.8476	0.229828	17.3824	2.51233	9.57096	0.690424	12.1573	1.67785	12.5247	0.761693	16.6061	2.41929
GPR21-Hs00271059_s1	Target	28.0231	0.6543	28.3811	1.03748	28.2792	1.17591	27.518	0.727955	27.5647	0.628703	28.3224	0.26695	6.99467	0.682491	7.43034	0.887276	5.48966	0.705047	6.75803	0.564719	5.75353	0.302009	7.5838	0.426963
GPR22-Hs00271063_s1	Target	27.6684	0.154258	28.6201	1.05102	28.431	1.95166	27.0354	0.79235	27.8411	0.221227	28.2005	0.184338	6.64002	0.144194	7.66934	0.945318	5.6414	1.23097	6.27543	0.460026	6.02993	0.120739	7.4619	0.249673
GPR23-Hs00271072_s1	Target	35.1249	3.87023	32.4145	1.05765	34.048	4.03986	27.536	0.215528	29.8802	0.700094	28.0509	0.069737	14.0965	3.86853	11.4638	0.990241	11.2584	3.38318	6.77593	0.356961	8.0691	0.555463	7.3123	0.110417
GPR24-Hs00538798_m1	Target	38.042	3.916	33.779	3.73655	35.4808	4.16427	36.3983	3.1388	40	0	35.6618	3.75883	17.0137	3.89371	12.8282	3.73848	12.6913	4.37121	15.6383	3.18949	18.1889	0.327999	14.9232	3.86943
GPR25-Hs00271089_s1	Target	26.118	1.4597	38.7673	2.7564	36.7906	4.73072	29.9799	1.21273	23.0932	0.182958	30.787	0.617953	5.08967	1.44209	17.8166	2.98238	14.0011	4.8723	9.21983	1.28701	1.28207	0.201251	10.0484	0.738065
GPR26-Hs00538034_m1	Target	40	0	39.6991	0.672922	37.6154	4.33442	39.858	0.246009	40	0	40	0	18.9717	0.0461938	18.7483	0.490439	14.8259	4.23326	19.0979	0.641142	18.1889	0.327999	19.2614	0.160044
GPR27-Hs00251809_s1	Target	36.0393	2.65091	32.3541	1.49324	29.7792	0.724209	31.3202	1.08363	30.5783	0.513421	34.8617	0.726073	15.011	2.62472	11.4033	1.33178	6.98966	0.998973	10.5601	0.533996	8.7672	0.204932	14.1231	0.76911
GPR3-Hs00270991_s1	Target	34.08	0.59424	30.9711	0.757663	31.2251	1.54933	29.7008	1.09202	28.3589	0.152677	31.513	0.766916	13.0516	0.556347	10.0203	0.846063	8.43558	1.21896	8.94073	0.531621	6.54773	0.177838	10.7745	0.785605
GPR30-Hs00173506_m1	Target	34.7203	3.60621	27.0354	0.573045	31.3411	0.745827	27.5781	0.700353	29.9677	0.701904	40	0	13.692	3.62758	6.08464	0.39755	8.55154	1.2747	6.81807	0.490471	8.1566	0.38515	19.2614	0.160044
GPR31-Hs00271094_s1	Target	33.595	4.28178	35.7178	4.197	35.9435	5.65971	36.164	6.64409	40	0	38.086	3.3152	12.5667	4.30083	14.767	4.04409	13.1539	5.24509	15.404	6.73051	18.1889	0.327999	17.3474	3.47031
GPR32-Hs01102536_s1	Target	33.8602	1.54714	36.519	5.06172	34.3298	5.42867	32.7726	4.69956	34.7654	0.90361	38.1699	3.16988	12.8318	1.56531	15.5682	4.84385	11.5402	5.63043	12.0126	4.51217	12.9542	1.0625	17.4313	3.05963
GPR34-Hs00271105_s1	Target	26.3008	2.11082	23.0041	0.525927	27.6354	1.54078	25.1304	0.52168	28.6112	0.367004	24.0446	0.0612288	5.27245	2.07918	2.05336	0.378173	4.84592	0.837368	4.3703	0.086514	6.80003	0.0495679	3.306	0.0995112
GPR35-Hs00271114_s1	Target	25.6859	0.700217	28.2603	0.374494	25.4891	0.40703	24.5946	0.588543	25.1762	0.779689	25.025	0.211031	4.65757	0.66883	7.30958	0.268802	2.6995	0.850992	3.83457	0.0422959	3.36507	0.506278	4.2864	0.364049
GPR37-Hs00173744_m1	Target	32.0001	1.08346	37.3303	3.70641	40	0	36.5836	2.9822	32.3378	0.180858	40	0	10.9717	1.10864	16.3795	3.85722	17.2105	0.848364	15.8236	3.52811	10.5266	0.506943	19.2614	0.160044
GPR37L1-Hs00191104_m1	Target	38.2019	3.5963	40	0	40	0	39.6709	0.56996	39.9677	0.056003	40	0	17.1735	3.5979	19.0493	0.284944	17.2105	0.848364	18.9109	1.07851	18.1566	0.366391	19.2614	0.160044
GPR39-Hs00230762_m1	Target	33.078	1.81425	31.4989	0.908824	38.3193	2.99376	36.0517	3.42059	40	0	40	0	12.0497	1.7791	10.5482	1.08415	15.5297	3.02155	15.2916	3.41951	18.1889	0.327999	19.2614	0.160044
GPR4-Hs00270999_s1	Target	36.2206	4.36442	37.3317	3.65984	35.5115	4.52788	32.0796	3.02604	31.0139	0.671821	29.3757	0.315837	15.1922	4.34662	16.3809	3.70316	12.722	4.38292	11.3196	2.96047	9.2028	0.663169	8.6372	0.208396
GPR40-Hs00271118_s1	Target	31.3041	1.0866	29.8747	0.993225	32.0267	1.66571	30.6407	2.3329	26.5192	0.15315	32.1122	0.539924	10.2758	1.06738	8.92396	1.10804	9.23714	1.40322	9.88067	2.47622	4.70813	0.23243	11.3736	0.394121
GPR43-Hs00271142_s1	Target	26.8165	1.43448	28.3333	0.497508	26.1543	1.29693	30.6032	2.34667	29.1108	0.434149	24.1664	0.360128	5.78812	1.45083	7.38252	0.599251	3.3648	0.866764	9.84323	2.08235	7.29963	0.40853	3.42783	0.270653
GPR44-Hs00173717_m1	Target	33.9981	4.09288	32.8368	4.31171	28.4379	1.06929	32.0971	1.42699	31.5905	1.14399	35.6795	3.78964	12.9697	4.05077	11.8861	4.26171	5.64836	1.39899	11.337	1.69967	9.7794	0.917234	14.9409	3.81045
GPR45-Hs00273112_s1	Target	29.3882	0.790089	29.1383	0.697455	30.9743	1.40377	29.928	1.79203	33.2106	0.484568	27.9839	0.221228	8.35983	0.791545	8.1876	0.701879	8.18472	1.01955	9.16797	1.72796	11.3994	0.802073	7.24527	0.128342
GPR50-Hs00173684_m1	Target	40	0	39.0839	2.04855	39.4096	1.32017	40	0	36.2142	3.3368	40	0	18.9717	0.0461938	18.1331	2.12278	16.6201	2.09711	19.24	0.565314	14.4031	3.29872	19.2614	0.160044
GPR51-Hs00193804_m1	Target	38.7714	1.88749	30.2383	2.18056	37.8949	2.05461	29.9891	0.389876	30.0966	0.211221	40	0	17.743	1.8645	9.28758	1.95985	15.1054	2.22583	9.2291	0.468135	8.28547	0.2339	19.2614	0.160044
GPR52-Hs00271672_s1	Target	28.3362	0.86967	29.5334	0.956664	29.2631	1.71277	25.374	0.719137	25.0457	0.466869	27.4782	0.261124	7.30785	0.881253	8.58266	0.830815	6.47354	1.10079	4.61397	0.385023	3.23453	0.139404	6.7396	0.264763
GPR54-Hs00261399_m1	Target	34.6842	3.05586	35.6478	2.61167	38.7221	2.85756	37.8052	3.52301	40	0	40	0	13.6558	3.08925	14.6971	2.52561	15.9325	2.58283	17.0452	3.02634	18.1889	0.327999	19.2614	0.160044
GPR55-Hs00271662_s1	Target	31.5959	0.940406	31.7205	1.30969	32.5959	1.19758	34.9817	4.81875	27.5569	0.48829	27.0621	0.148626	10.5676	0.946691	10.7698	1.39781	9.80644	0.682249	14.2217	4.58048	5.7458	0.161092	6.3235	0.0759147
GPR56-Hs00173754_m1	Target	26.6002	1.41666	32.0293	1.41612	30.9151	1.47514	24.8874	0.683353	28.1182	0.481436	32.5918	0.841619	5.57183	1.42487	11.0785	1.62326	8.12556	1.30632	4.12733	0.126936	6.3071	0.164871	11.8532	0.817162
GPR6-Hs00271008_s1	Target	40	0	38.7077	2.88972	38.0551	4.34888	36.5363	5.99936	38.2216	3.08028	40	0	18.9717	0.0461938	17.7569	2.89094	15.2656	4.10572	15.7762	6.08827	16.4105	3.20833	19.2614	0.160044
GPR61-Hs00259108_s1	Target	31.4664	0.669794	32.7005	1.06689	32.5447	2.09959	31.5555	2.54616	29.481	0.424112	31.5979	0.272927	10.438	0.660674	11.7497	1.09626	9.75514	1.38244	10.7954	2.3781	7.6699	0.132109	10.8593	0.432468
GPR62-Hs00607814_s1	Target	31.7463	1.26673	32.9682	1.15988	35.0211	3.31258	32.3139	2.29835	30.0293	0.173079	29.4766	0.142033	10.7179	1.27434	12.0175	1.09839	12.2316	3.49413	11.5539	2.23499	8.2181	0.44731	8.73807	0.174074
GPR63-Hs00229240_m1	Target	32.38	0.911797	33.3234	3.75643	35.8136	3.5193	30.0251	0.355214	29.5812	0.499211	27.287	0.144091	11.3516	0.889458	12.3726	3.77521	13.0241	2.81848	9.2651	0.24217	7.77013	0.196671	6.54847	0.150648
GPR64-Hs00173773_m1	Target	28.5573	1.01288	36.1267	3.56032	40	0	29.9879	1.15117	40	0	32.5882	0.49457	7.529	1.0189	15.176	3.33	17.2105	0.848364	9.22783	0.600573	18.1889	0.327999	11.8496	0.642364
GPR65-Hs00269247_s1	Target	21.835	0.478481	23.1884	0.213562	23.9924	1.00638	23.1766	0.608486	23.955	0.504722	25.967	0.216479	0.8067	0.444732	2.23764	0.12829	1.20288	0.232	2.4166	0.157448	2.14387	0.192621	5.22847	0.333115
GPR68-Hs00268858_s1	Target	23.7699	0.727567	23.4465	0.538867	29.4948	1.42494	21.263	0.468775	23.4229	0.421064	24.6516	0.145315	2.74153	0.756784	2.49574	0.703892	6.70528	1.14588	0.502967	0.218477	1.61173	0.174215	3.91303	0.230956
GPR7-Hs00271017_s1	Target	36.0472	4.58947	30.7332	0.982468	33.1698	4.12146	34.2172	5.27822	30.9454	0.651195	40	0	15.0188	4.63044	9.78244	0.909286	10.3803	3.94633	13.4571	4.97387	9.1343	0.373604	19.2614	0.160044
GPR73-Hs00373446_m1	Target	37.4671	2.77032	34.6382	1.95438	40	0	38.1158	3.26359	34.8208	0.902597	35.8893	3.56638	16.4388	2.73637	13.6875	2.12061	17.2105	0.848364	17.3557	3.37363	13.0097	0.738007	15.1507	3.40949
GPR73L1-Hs00431207_m1	Target	40	0	40	0	36.8949	3.12826	32.5498	0.718301	35.4844	2.46226	40	0	18.9717	0.0461938	19.0493	0.284944	14.1054	3.23301	11.7897	0.196533	13.6733	2.1941	19.2614	0.160044
GPR74-Hs00170499_m1	Target	40	0	40	0	40	0	40	0	30.4547	0.529945	40	0	18.9717	0.0461938	19.0493	0.284944	17.2105	0.848364	19.24	0.565314	8.64357	0.587329	19.2614	0.160044
GPR75-Hs00173848_m1	Target	29.7825	1.31673	33.8034	3.64292	34.6998	3.09882	33.5673	1.11582	31.9544	1.31361	28.8439	0.1677	8.75415	1.34092	12.8526	3.84986	11.9103	2.5109	12.8073	0.563709	10.1433	1.5676	8.10533	0.0448862
GPR77-Hs00218495_m1	Target	26.4793	0.767222	26.9535	0.272996	26.0194	0.646107	27.6886	0.986567	26.4464	0.382651	27.9687	0.0446944	5.45095	0.731585	6.00278	0.0905752	3.2299	0.638984	6.9286	0.423087	4.63527	0.138257	7.23013	0.201341
GPR78-Hs00326481_m1	Target	40	0	40	0	40	0	40	0	40	0	40	0	18.9717	0.0461938	19.0493	0.284944	17.2105	0.848364	19.24	0.565314	18.1889	0.327999	19.2614	0.160044
GPR8-Hs00271023_s1	Target	37.1012	3.34803	38.7715	2.74701	38.0296	3.82329	31.5279	1.26069	40	0	31.5092	0.347851	16.0728	3.33016	17.8208	2.53562	15.2401	3.68186	10.7679	1.21408	18.1889	0.327999	10.7706	0.243032
GPR81-Hs00261411_s1	Target	32.2135	0.703816	34.6864	3.127	35.6466	3.3612	30.5349	1.6778	28.9227	0.236988	40	0	11.1852	0.715804	13.7357	3.11362	12.8571	3.28888	9.77493	1.52217	7.11153	0.172207	19.2614	0.160044
GPR82-Hs00369838_s1	Target	28.1412	1.27893	26.6791	0.292586	30.4033	0.978825	24.3184	0.703333	27.4313	0.597396	25.8861	0.2336	7.11285	1.25987	5.72838	0.405217	7.61374	0.440463	3.55837	0.141412	5.6202	0.341999	5.1475	0.276821
GPR83-Hs00173906_m1	Target	35.2393	3.21288	35.0941	2.8912	36.4069	3.28063	32.3655	0.39644	33.3678	0.945582	31.5797	0.184906	14.211	3.2049	14.1433	2.88252	13.6173	2.98877	11.6055	0.430596	11.5567	0.980165	10.8411	0.0625129
GPR84-Hs00220561_m1	Target	26.2019	1.43573	26.7746	0.812787	29.1141	1.44785	26.4458	0.641571	25.2814	0.245774	24.5145	0.028936	5.17358	1.43244	5.82384	0.838887	6.32462	0.835625	5.68583	0.200897	3.47033	0.130023	3.7759	0.143497
GPR85-Hs00173925_m1	Target	26.7759	0.546307	28.0949	1.47902	32.3817	0.967604	27.6342	0.68359	28.4035	0.544885	29.2549	0.276411	5.74758	0.540633	7.14412	1.28946	9.59214	0.923433	6.8742	0.120684	6.59237	0.500363	8.51637	0.238006
GPR87-Hs00225057_m1	Target	31.6454	1.71967	32.9705	3.47853	30.602	2.95899	40	0	40	0	40	0	10.6171	1.71048	12.0198	3.27713	7.81246	3.7937	19.24	0.565314	18.1889	0.327999	19.2614	0.160044
GPR88-Hs00222812_m1	Target	40	0	36.8847	4.34211	38.2875	3.82922	37.9664	3.52236	28.7967	0.378385	37.8487	3.7261	18.9717	0.0461938	15.934	4.45899	15.498	4.58214	17.2064	3.01282	6.98557	0.0532748	17.1102	3.61552
GPR92-Hs00252675_s1	Target	27.3214	1.19933	27.9375	0.71051	30.5028	0.503783	29.0949	0.541762	26.527	0.427426	30.7498	0.579613	6.29303	1.17929	6.98674	0.802165	7.71332	0.604196	8.33483	0.175877	4.71587	0.0994571	10.0112	0.490692
GPR97-Hs00416887_m1	Target	28.4058	1.35717	35.1799	3.23043	29.6084	1.90369	30.8253	0.37286	34.1131	0.32223	28.4547	0.158163	7.37745	1.33768	14.2291	3.23318	6.8189	1.88091	10.0653	0.192752	12.302	0.33708	7.71613	0.108236
GPRC5A-Hs00173681_m1	Target	28.2995	1.69436	38.1415	2.6321	35.7691	3.90498	37.8372	3.74602	34.2383	1.32283	40	0	7.2711	1.67302	17.1908	2.57808	12.9796	3.65672	17.0772	3.85022	12.4272	1.00401	19.2614	0.160044
GPRC5B-Hs00212116_m1	Target	29.8461	2.4485	28.586	0.467492	35.335	4.33575	37.7672	3.86727	31.5505	0.310713	30.4493	0.517256	8.8177	2.46443	7.63522	0.548268	12.5455	3.9989	17.0072	3.97015	9.73937	0.185002	9.71067	0.64563
GPRC5C-Hs00230763_m1	Target	40	0	38.8567	2.55645	39.6974	0.676545	40	0	40	0	39.8894	0.191623	18.9717	0.0461938	17.906	2.3456	16.9079	0.808219	19.24	0.565314	18.1889	0.327999	19.1508	0.214588
GPRC5D-Hs00218660_m1	Target	38.4615	3.07695	35.9145	2.71503	40	0	40	0	40	0	40	0	17.4332	3.12004	14.9638	2.85337	17.2105	0.848364	19.24	0.565314	18.1889	0.327999	19.2614	0.160044
GPRC6A-Hs00536972_m1	Target	40	0	38.8169	2.64549	40	0	40	0	40	0	40	0	18.9717	0.0461938	17.8662	2.43433	17.2105	0.848364	19.24	0.565314	18.1889	0.327999	19.2614	0.160044
GRM1-Hs00168250_m1	Target	34.7813	3.82628	29.0731	0.62347	40	0	38.7324	2.19561	32.4749	0.338663	31.8366	0.590128	13.753	3.84377	8.12238	0.423255	17.2105	0.848364	17.9724	2.67175	10.6637	0.407485	11.098	0.625793
GRM2-Hs00356062_m1	Target	38.3293	3.3415	36.7229	3.57013	31.6623	0.758769	35.4766	3.94698	29.5039	0.573042	32.8472	0.250221	17.3009	3.31985	15.7721	3.56993	8.87278	0.913758	14.7166	3.46542	7.6928	0.25971	12.1086	0.187561
GRM3-Hs00168260_m1	Target	40	0	39.4354	1.26239	39.9452	0.122492	40	0	34.8544	0.599516	40	0	18.9717	0.0461938	18.4847	1.0603	17.1557	0.956225	19.24	0.565314	13.0433	0.892199	19.2614	0.160044
GRM4-Hs00168265_m1	Target	38.3775	3.2449	40	0	39.0316	2.16545	40	0	30.224	0.583817	32.955	0.21667	17.3492	3.24653	19.0493	0.284944	16.2421	2.0821	19.24	0.565314	8.41287	0.405321	12.2165	0.0568143
GRM5-Hs00168275_m1	Target	38.837	2.3259	39.2338	1.71328	37.9689	2.84742	38.3488	2.85996	40	0	40	0	17.8087	2.32766	18.2831	1.5064	15.1793	3.14563	17.5888	2.35282	18.1889	0.327999	19.2614	0.160044
GRM6-Hs00168282_m1	Target	40	0	40	0	40	0	40	0	40	0	40	0	18.9717	0.0461938	19.0493	0.284944	17.2105	0.848364	19.24	0.565314	18.1889	0.327999	19.2614	0.160044
GRM7-Hs00356067_m1	Target	40	0	40	0	38.9988	1.42267	40	0	40	0	40	0	18.9717	0.0461938	19.0493	0.284944	16.2092	1.50508	19.24	0.565314	18.1889	0.327999	19.2614	0.160044
GRM8-Hs00168299_m1	Target	40	0	39.6249	0.838839	39.6402	0.804537	38.3913	2.78641	29.7302	0.300944	38.3046	2.93652	18.9717	0.0461938	18.6741	0.647336	16.8506	0.923891	17.6312	2.9042	7.91907	0.194234	17.566	2.89814
GRPR-Hs00193415_m1	Target	34.4307	3.86593	30.1907	0.66988	33.6274	2.89826	38.1107	3.27242	31.567	0.675266	33.8783	1.13268	13.4023	3.85228	9.23994	0.604984	10.8378	2.10867	17.3506	3.74255	9.75587	0.406891	13.1397	1.24062
GUSB-Hs99999908_m1	Selected Control	21.8452	0.38969	21.1972	0.532152	23.6738	0.719951	21.616	0.556581	21.9291	0.327621	21.179	0.0742494	0.816825	0.408949	0.2464	0.267832	0.88426	0.225998	0.855967	0.130158	0.118	0.0892904	0.4404	0.115432
HCRTR1-Hs00173513_m1	Target	34.4738	3.80311	36.6606	4.79875	39.476	1.12892	40	0	40	0	40	0	13.4455	3.80623	15.7098	4.58336	16.6864	1.59646	19.24	0.565314	18.1889	0.327999	19.2614	0.160044
HCRTR2-Hs00155416_m1	Target	40	0	34.2032	3.78109	40	0	27.5826	0.65726	32.3916	0.351834	37.8034	3.80468	18.9717	0.0461938	13.2525	3.86184	17.2105	0.848364	6.8226	0.097255	10.5805	0.658628	17.0648	3.76535
HDAC3-Hs00187320_m1	Target	23.8173	0.128045	23.711	0.16245	24.8288	0.800287	23.411	0.511491	23.6995	0.270131	23.2727	0.236323	2.78895	0.104515	2.7603	0.178553	2.03924	0.117478	2.651	0.0823803	1.88833	0.10692	2.5342	0.129248
HMBS-Hs00609297_m1	Selected Control	25.1196	0.609001	24.5315	0.700425	25.9895	0.569671	24.5957	0.802267	24.771	0.382378	24.0806	0.255993	4.09125	0.576479	3.58078	0.439134	3.19992	0.856562	3.83567	0.24176	2.95983	0.0576569	3.34203	0.105617
HPRT1-Hs99999909_m1	Selected Control	24.0442	0.129473	23.81	0.295528	25.4097	1.20363	23.2973	0.597747	24.3822	0.256566	21.4549	0.256455	3.01588	0.134814	2.85922	0.431047	2.62018	0.473993	2.53733	0.0541786	2.57107	0.0926211	0.716367	0.0964102
HRH1-Hs00185542_m1	Target	29.3674	1.23006	29.9147	0.771301	39.7153	0.636564	31.6226	0.591779	28.03	0.37767	30.183	0.779479	8.33903	1.25454	8.96394	0.57916	16.9258	1.4346	10.8626	0.72471	6.2188	0.126031	9.44447	0.883988
HRH2-Hs00254569_s1	Target	28.2473	1.49354	27.2461	0.586892	24.7128	1.10024	27.8423	0.823994	27.2877	0.535565	24.5676	0.162763	7.21898	1.46487	6.29538	0.767179	1.92324	0.348991	7.08223	0.406614	5.4766	0.217158	3.82907	0.115773
HRH3-Hs00200610_m1	Target	40	0	37.8451	4.81859	40	0	40	0	40	0	38.821	2.04203	18.9717	0.0461938	16.8943	4.60421	17.2105	0.848364	19.24	0.565314	18.1889	0.327999	18.0825	1.93301
HRH4-Hs00222094_m1	Target	33.7664	1.03496	29.8873	1.34773	32.4145	1.33232	30.1114	0.401714	37.7561	3.88661	32.471	0.318645	12.738	0.996749	8.93648	1.34036	9.62496	1.59649	9.35133	0.335424	15.945	3.56384	11.7324	0.208102
HTR1A-Hs00265014_s1	Target	38.4552	3.08965	38.8641	2.53999	37.9875	4.50013	36.766	5.60145	38.0962	3.29754	40	0	17.4268	3.09129	17.9133	2.5432	15.1979	4.25427	16.006	5.69218	16.285	3.42465	19.2614	0.160044
HTR1B-Hs00265286_s1	Target	37.7719	3.88019	38.6424	3.03569	34.9884	4.81211	34.0402	5.59301	28.3814	0.412689	40	0	16.7435	3.87927	17.6917	2.82361	12.1989	4.10602	13.2801	5.99775	6.5703	0.41414	19.2614	0.160044
HTR1D-Hs00704742_s1	Target	40	0	33.8103	6.64436	36.6788	4.76145	32.1754	2.61638	38.1684	3.17242	40	0	18.9717	0.0461938	12.8595	6.50081	13.8892	4.61908	11.4154	2.67752	16.3573	3.3	19.2614	0.160044
HTR1E-Hs00704779_s1	Target	40	0	40	0	38.1167	4.2111	36.6618	5.78187	36.9842	2.62146	40	0	18.9717	0.0461938	19.0493	0.284944	15.3272	3.97057	15.9018	5.87174	15.1731	2.49993	19.2614	0.160044
HTR1F-Hs00265296_s1	Target	30.3316	1.46025	31.8274	1.53144	31.9505	4.57223	33.8268	5.81329	36.2256	3.27576	40	0	9.30325	1.47197	10.8766	1.55862	9.16096	3.81631	13.0667	5.54795	14.4145	3.59543	19.2614	0.160044
HTR2A-Hs00167241_m1	Target	40	0	35.8129	3.94796	40	0	40	0	32.0934	0.255552	36.2123	3.28783	18.9717	0.0461938	14.8621	3.74578	17.2105	0.848364	19.24	0.565314	10.2823	0.173988	15.4737	3.40933
HTR2B-Hs00168362_m1	Target	31.4517	0.843607	30.2874	1.03979	37.6477	5.25986	30.7509	0.246243	31.2948	0.344206	30.3081	0.410397	10.4233	0.815544	9.33662	1.02229	14.8582	6.00803	9.99087	0.677001	9.48367	0.326908	9.5695	0.320383
HTR2C-Hs00168365_m1	Target	40	0	38.9833	2.2735	40	0	40	0	33.8096	0.427717	40	0	18.9717	0.0461938	18.0325	2.24583	17.2105	0.848364	19.24	0.565314	11.9985	0.480213	19.2614	0.160044
HTR4-Hs00168380_m1	Target	40	0	37.5395	2.4221	40	0	40	0	40	0	40	0	18.9717	0.0461938	16.5887	2.35192	17.2105	0.848364	19.24	0.565314	18.1889	0.327999	19.2614	0.160044
HTR5A-Hs00225153_m1	Target	40	0	40	0	40	0	40	0	40	0	40	0	18.9717	0.0461938	19.0493	0.284944	17.2105	0.848364	19.24	0.565314	18.1889	0.327999	19.2614	0.160044
HTR6-Hs00168381_m1	Target	40	0	40	0	40	0	40	0	40	0	40	0	18.9717	0.0461938	19.0493	0.284944	17.2105	0.848364	19.24	0.565314	18.1889	0.327999	19.2614	0.160044
HTR7-Hs00252002_m1	Target	31.377	0.769358	31.9335	0.917416	32.7625	0.6824	30.8549	0.103313	26.995	0.534966	36.2999	3.2057	10.3487	0.790928	10.9828	0.961663	9.97292	0.998943	10.0949	0.534383	5.1839	0.226153	15.5613	3.24755
IL8RA-Hs00174146_m1	Target	34.1398	4.2043	31.924	1.88212	31.1184	1.62465	40	0	38.8101	2.06097	37.7481	1.9519	13.1115	4.16999	10.9733	1.76937	8.32886	1.19041	19.24	0.565314	16.999	2.28497	17.0095	1.7958
IL8RB-Hs00174304_m1	Target	28.3361	1.90999	26.3386	0.543751	26.1069	1.0269	26.6771	0.60818	28.0467	0.367586	26.3073	0.226635	7.30772	1.87274	5.38786	0.532054	3.31738	0.252288	5.91707	0.0862792	6.23557	0.0396269	5.56873	0.172452
IPO8-Hs00183533_m1	Selected Control	23.7156	0.128765	23.8462	0.662213	25.2976	0.740514	24.2692	0.593964	24.2156	0.262891	24.2122	0.344632	2.68723	0.124028	2.89548	0.379799	2.50802	0.316666	3.50917	0.0743157	2.4044	0.145346	3.47363	0.193435
LANCL1-Hs00173798_m1	Target	25.2813	0.35	25.3132	0.199745	27.1604	0.683777	24.4769	0.539527	26.3333	0.436516	24.4594	0.21016	4.25293	0.388613	4.3625	0.24115	4.37084	0.488851	3.7169	0.102761	4.5222	0.10864	3.72083	0.0691691
LANCL2-Hs00251523_m1	Target	26.4383	0.34574	26.6721	0.556283	28.3602	1.1284	26.0416	0.695668	26.7812	0.230179	26.2407	0.245617	5.4099	0.356662	5.72132	0.537163	5.57066	0.392886	5.28157	0.157374	4.97007	0.0980691	5.50213	0.115278
LGR4-Hs00173908_m1	Target	28.3696	2.16655	26.8162	0.598198	29.822	1.06273	32.5332	0.931993	26.0937	0.314704	34.1405	1.18544	7.3412	2.13025	5.86546	0.745441	7.03254	0.93931	11.7731	0.443915	4.28263	0.0543442	13.4019	1.32857
LGR5-Hs00173664_m1	Target	40	0	40	0	40	0	40	0	40	0	40	0	18.9717	0.0461938	19.0493	0.284944	17.2105	0.848364	19.24	0.565314	18.1889	0.327999	19.2614	0.160044
LGR6-Hs00663887_m1	Target	29.0231	1.92499	37.7106	3.34952	34.8262	3.60017	40	0	35.2607	4.10466	37.6424	4.08348	7.99478	1.90814	16.7599	3.22876	12.0367	3.81786	19.24	0.565314	13.4496	4.42882	16.9038	4.23855
LGR7-Hs00222171_m1	Target	38.5217	2.9565	38.5045	2.0486	37.4209	2.37652	40	0	25.958	0.326321	40	0	17.4934	2.99965	17.5538	1.87651	14.6314	1.62741	19.24	0.565314	4.14683	0.262137	19.2614	0.160044
LHCGR-Hs00174885_m1	Target	40	0	38.9536	2.33978	39.7454	0.569348	40	0	40	0	40	0	18.9717	0.0461938	18.0029	2.12965	16.9558	0.824944	19.24	0.565314	18.1889	0.327999	19.2614	0.160044
LONPL-Hs00398186_m1	Target	23.1757	0.449523	23.2139	0.264882	24.1597	0.852154	22.8758	0.459507	23.6671	0.369036	23.3587	0.217469	2.14735	0.460335	2.26316	0.341792	1.37016	0.263761	2.1158	0.133077	1.856	0.0810264	2.6202	0.0644204
LPHN1-Hs00208706_m1	Target	29.8483	1.49582	29.5111	1.00231	30.9976	0.637014	33.2668	0.532335	29.0231	0.57582	26.1475	0.212384	8.81993	1.46158	8.5603	1.06013	8.20812	0.734173	12.5067	0.709592	7.21197	0.27304	5.40897	0.0523985
LPHN2-Hs00202347_m1	Target	32.7371	0.783642	38.636	1.8807	37.2221	3.9531	37.9297	3.58581	23.9845	0.410353	40	0	11.7087	0.751476	17.6853	1.69204	14.4325	4.51105	17.1697	3.69174	2.17343	0.0974512	19.2614	0.160044
LPHN3-Hs00248624_m1	Target	40	0	37.2286	2.6282	38.2848	2.43219	23.7472	0.551592	25.6202	0.561639	40	0	18.9717	0.0461938	16.2779	2.8162	15.4953	2.07612	2.9872	0.0196145	3.8091	0.233718	19.2614	0.160044
LTB4R-Hs00175124_m1	Target	27.8457	1.20007	27.9206	0.651302	25.48	0.430221	26.8069	0.424833	28.4471	0.66356	26.9003	0.108571	6.8173	1.1926	6.96988	0.416419	2.6905	0.550896	6.0469	0.183225	6.63597	0.345229	6.16173	0.185859
LTB4R2-Hs00251973_s1	Target	26.1877	1.29362	26.3576	0.281735	25.3208	0.627529	24.9332	0.650657	26.4731	0.59104	24.9385	0.155895	5.15937	1.28074	5.40682	0.226384	2.53132	0.402961	4.17317	0.250816	4.66203	0.2831	4.19987	0.147327
MAS1-Hs00267157_s1	Target	30.6889	1.91011	30.9244	1.06124	37.0655	4.3917	31.0005	1.41181	32.8776	0.571616	26.8762	0.245915	9.6605	1.92229	9.97364	0.832092	14.2759	3.94001	10.2404	1.50372	11.0664	0.43394	6.13767	0.276513
MAS1L-Hs00364818_s1	Target	38.4711	3.05785	37.4148	3.56505	38.0064	4.45791	36.4169	6.20611	40	0	40	0	17.4427	3.0595	16.4641	3.73433	15.2168	4.21283	15.6569	6.29416	18.1889	0.327999	19.2614	0.160044
MASS1-Hs00287672_m1	Target	36.2	4.38787	40	0	37.847	2.95114	40	0	36.849	2.76714	38.4465	2.69068	15.1717	4.37027	19.0493	0.284944	15.0575	2.51928	19.24	0.565314	15.0379	3.07855	17.708	2.65268
MATK-Hs00176738_m1	Target	23.9106	0.255592	22.196	0.460953	30.4389	0.955145	25.5446	0.458624	24.8681	0.291213	27.6917	0.158143	2.88223	0.272306	1.24522	0.234191	7.64938	1.2176	4.78453	0.106969	3.057	0.0609948	6.95313	0.276423
MC1R-Hs00267168_s1	Target	28.5198	0.529747	27.561	0.204082	31.2671	1.25264	28.2228	0.901247	28.5039	0.359873	27.2264	0.243865	7.49145	0.508096	6.61024	0.203329	8.47756	0.516553	7.46273	0.41451	6.6928	0.235899	6.4878	0.204067
MC2R-Hs00265039_s1	Target	38.2904	3.4191	40	0	36.7558	3.54257	35.2719	4.81598	40	0	40	0	17.2621	3.42071	19.0493	0.284944	13.9663	3.57599	14.5119	5.15823	18.1889	0.327999	19.2614	0.160044
MC3R-Hs00252036_s1	Target	40	0	38.5394	3.26609	36.7045	4.84434	36.2394	6.51355	40	0	35.7973	3.7527	18.9717	0.0461938	17.5886	3.05352	13.915	4.45541	15.4794	6.60043	18.1889	0.327999	15.0588	3.61314
MC4R-Hs00271877_s1	Target	38.404	3.1921	38.5801	3.17499	38.0528	4.35407	34.5286	5.1617	40	0	40	0	17.3756	3.19373	17.6294	2.96259	15.2632	4.11086	13.7686	4.90137	18.1889	0.327999	19.2614	0.160044
MC5R-Hs00271882_s1	Target	38.6304	2.7391	38.9753	2.29134	39.0023	2.23084	38.9284	1.85612	40	0	40	0	17.6021	2.78225	18.0246	2.08136	16.2128	2.06707	18.1683	1.9996	18.1889	0.327999	19.2614	0.160044
MELL1-Hs00364353_m1	Target	32.6643	1.30848	33.55	0.544162	33.2125	1.0209	40	0	40	0	38.6059	2.41465	11.636	1.3062	12.5993	0.5084	10.423	1.46114	19.24	0.565314	18.1889	0.327999	17.8673	2.37717
MLNR-Hs00173507_m1	Target	39.1686	1.6628	36.6157	1.96986	35.5352	3.01981	40	0	30.3467	0.0671095	40	0	18.1403	1.6414	15.665	1.96557	12.7457	3.0006	19.24	0.565314	8.53553	0.262571	19.2614	0.160044
MRGPRD-Hs01651289_s1	Target	40	0	40	0	38.8302	2.61566	40	0	40	0	39.1111	1.53962	18.9717	0.0461938	19.0493	0.284944	16.0407	2.42735	19.24	0.565314	18.1889	0.327999	18.3725	1.43178
MRGPRE-Hs00664150_s1	Target	38.4001	3.1999	38.0475	2.68855	33.9228	1.89012	36.513	6.03966	37.7051	3.97488	40	0	17.3717	3.17826	17.0967	2.8518	11.1333	1.95971	15.753	6.1284	15.894	4.19247	19.2614	0.160044
MRGPRF-Hs00332805_m1	Target	37.6934	2.67838	27.2203	1.00037	36.3517	2.3711	34.1497	1.0306	37.233	2.44602	40	0	16.6651	2.64032	6.2696	0.899949	13.5622	1.7106	13.3897	0.532174	15.4218	2.29046	19.2614	0.160044
MRGPRX1-Hs00600918_s1	Target	40	0	40	0	36.9193	4.4605	36.4347	6.17534	40	0	40	0	18.9717	0.0461938	19.0493	0.284944	14.1297	4.6409	15.6746	6.26357	18.1889	0.327999	19.2614	0.160044
MRGPRX2-Hs00365019_s1	Target	34.4696	3.70188	38.9593	2.32712	37.3326	4.69811	33.6033	5.94046	40	0	39.8815	0.205248	13.4412	3.72748	18.0085	2.11704	14.543	4.61828	12.8433	5.65735	18.1889	0.327999	19.1429	0.146999
MRGPRX3-Hs00754695_s1	Target	33.081	5.13583	38.6304	3.06252	36.585	4.87202	36.3264	6.36292	40	0	40	0	12.0526	5.148	17.6797	2.85039	13.7954	5.0791	15.5663	6.45036	18.1889	0.327999	19.2614	0.160044
MRGPRX4-Hs00607779_s1	Target	39.4662	1.06765	38.7134	2.87701	38.4781	3.40316	36.9057	5.35943	40	0	40	0	18.4378	1.04654	17.7626	2.66525	15.6885	3.18265	16.1457	5.45138	18.1889	0.327999	19.2614	0.160044
MTNR1A-Hs00195567_m1	Target	40	0	39.4168	1.30403	40	0	40	0	40	0	40	0	18.9717	0.0461938	18.4661	1.10138	17.2105	0.848364	19.24	0.565314	18.1889	0.327999	19.2614	0.160044
MTNR1B-Hs00173794_m1	Target	40	0	40	0	40	0	40	0	40	0	40	0	18.9717	0.0461938	19.0493	0.284944	17.2105	0.848364	19.24	0.565314	18.1889	0.327999	19.2614	0.160044
NMBR-Hs00159627_m1	Target	40	0	40	0	40	0	36.2444	3.29814	40	0	40	0	18.9717	0.0461938	19.0493	0.284944	17.2105	0.848364	15.4843	2.80539	18.1889	0.327999	19.2614	0.160044
NMUR1-Hs00173804_m1	Target	29.7012	2.37093	32.7923	4.44606	36.3344	3.34757	30.7335	0.75799	27.4586	0.443163	32.7205	1.78802	8.67287	2.36845	11.8415	4.46536	13.5449	3.47368	9.97343	0.437467	5.6475	0.355961	11.9819	1.63504
NMUR2-Hs00173930_m1	Target	40	0	40	0	40	0	40	0	40	0	40	0	18.9717	0.0461938	19.0493	0.284944	17.2105	0.848364	19.24	0.565314	18.1889	0.327999	19.2614	0.160044
NPY1R-Hs00702150_s1	Target	38.6647	2.67065	39.064	2.09296	36.1793	3.94912	33.507	2.74126	32.4163	0.510369	40	0	17.6363	2.67235	18.1133	1.88383	13.3897	3.28955	12.747	2.72499	10.6052	0.399643	19.2614	0.160044
NPY2R-Hs00168567_m1	Target	40	0	39.9028	0.217256	37.8934	2.91271	40	0	40	0	40	0	18.9717	0.0461938	18.9521	0.183446	15.1039	3.25813	19.24	0.565314	18.1889	0.327999	19.2614	0.160044
NPY5R-Hs00196302_m1	Target	40	0	39.4362	1.26061	37.0596	4.07852	40	0	40	0	40	0	18.9717	0.0461938	18.4855	1.05858	14.2701	4.01087	19.24	0.565314	18.1889	0.327999	19.2614	0.160044
NPY6R-Hs00246222_s1	Target	31.4095	1.74172	31.3897	1.08704	33.4069	4.15769	36.9742	5.2409	28.9388	0.316785	32.4976	0.384548	10.3812	1.72592	10.439	0.968369	10.6174	4.20251	16.2141	5.3335	7.12773	0.166365	11.759	0.539339
NTSR1-Hs00173592_m1	Target	32.9749	1.05801	29.0415	0.678117	29.4585	1.21542	27.31	0.555222	23.6685	0.288853	31.8613	0.216578	11.9466	1.01958	8.09076	0.706454	6.66896	0.783941	6.54997	0.12792	1.85737	0.122632	11.1227	0.239403
NTSR2-Hs00173858_m1	Target	40	0	40	0	40	0	40	0	40	0	40	0	18.9717	0.0461938	19.0493	0.284944	17.2105	0.848364	19.24	0.565314	18.1889	0.327999	19.2614	0.160044
OPN1SW-Hs00181790_m1	Target	40	0	40	0	40	0	40	0	40	0	39.2072	1.37311	18.9717	0.0461938	19.0493	0.284944	17.2105	0.848364	19.24	0.565314	18.1889	0.327999	18.4687	1.33954
OPN3-Hs00173892_m1	Target	23.4281	0.447413	24.6275	0.542742	26.6171	0.50215	25.5568	0.60397	26.9281	0.496202	24.5176	0.229382	2.39968	0.421085	3.6768	0.442412	3.8276	0.533502	4.7968	0.219294	5.11703	0.224907	3.77903	0.08098
OPN4-Hs00264482_m1	Target	40	0	39.8669	0.297531	40	0	40	0	40	0	40	0	18.9717	0.0461938	18.9162	0.19991	17.2105	0.848364	19.24	0.565314	18.1889	0.327999	19.2614	0.160044
OPRD1-Hs00538331_m1	Target	40	0	39.0721	2.07489	40	0	35.9373	3.53221	36.3757	1.07387	40	0	18.9717	0.0461938	18.1213	2.04894	17.2105	0.848364	15.1772	3.06345	14.5646	0.747627	19.2614	0.160044
OPRK1-Hs00175127_m1	Target	31.3052	2.40871	37.1669	4.13646	40	0	40	0	40	0	40	0	10.2768	2.42073	16.2161	3.89991	17.2105	0.848364	19.24	0.565314	18.1889	0.327999	19.2614	0.160044
OPRL1-Hs00173471_m1	Target	28.1921	1.38085	26.1377	0.868145	26.6683	0.707508	25.5339	0.657651	28.2016	0.169765	25.3759	0.103183	7.1637	1.35487	5.18698	0.647516	3.87878	0.308449	4.77387	0.0924144	6.39047	0.384328	4.6373	0.163179
OPRM1-Hs00168570_m1	Target	39.0333	1.9333	38.0733	2.63988	39.266	1.29761	40	0	40	0	40	0	18.005	1.91183	17.1226	2.43626	16.4765	1.41086	19.24	0.565314	18.1889	0.327999	19.2614	0.160044
OR2A4-Hs00258414_s1	Target	24.9589	1.28358	29.0178	1.52104	30.0938	1.69569	30.0138	2.36138	26.2185	0.493151	40	0	3.93053	1.26798	8.06706	1.34764	7.30426	1.53155	9.25377	2.2867	4.4074	0.212027	19.2614	0.160044
OR2C3-Hs00812303_s1	Target	36.0117	4.63068	32.3529	0.675071	34.5539	5.17495	36.1516	6.66568	40	0	40	0	14.9834	4.61414	11.4022	0.795103	11.7644	4.75889	15.3915	6.75203	18.1889	0.327999	19.2614	0.160044
OR7C2-Hs00247330_s1	Target	40	0	38.78	2.72809	35.3775	4.37754	36.7443	5.63904	40	0	38.6353	2.36373	18.9717	0.0461938	17.8292	2.51675	12.5879	3.64025	15.9842	5.72964	18.1889	0.327999	17.8967	2.25423
OR7E5P-Hs00859932_gH	Target	39.4483	0.928501	38.8511	2.56902	40	0	40	0	40	0	40	0	18.42	0.913162	17.9004	2.35813	17.2105	0.848364	19.24	0.565314	18.1889	0.327999	19.2614	0.160044
OXER1-Hs00536961_s1	Target	26.5812	0.627098	24.2512	0.674719	25.4256	0.799104	23.888	0.667953	26.9875	0.572564	25.9466	0.0964194	5.55288	0.586967	3.3005	0.43332	2.63614	0.373459	3.12803	0.196352	5.17637	0.310505	5.208	0.103117
OXGR1-Hs00741623_s1	Target	38.5416	2.9169	33.0543	1.69257	33.5353	3.95458	36.5031	6.05675	40	0	40	0	17.5132	2.91857	12.1036	1.79214	10.7457	3.23901	15.7431	6.14542	18.1889	0.327999	19.2614	0.160044
OXTR-Hs00168573_m1	Target	30.9908	1.58063	31.898	0.909547	37.2118	2.81883	29.7326	0.500225	30.3445	0.55238	28.0402	0.341885	9.96252	1.57138	10.9473	0.891284	14.4222	2.20747	8.97253	0.275837	8.5334	0.242157	7.30167	0.48178
P2RY1-Hs00704965_s1	Target	23.672	0.449304	25.1581	0.765318	27.5216	1.3821	29.4904	1.02561	26.744	0.433298	40	0	2.6436	0.435264	4.20736	0.491787	4.7321	0.961315	8.7304	0.827118	4.93293	0.177775	19.2614	0.160044
P2RY10-Hs00274326_s1	Target	26.9477	1.37829	30.6564	1.87472	30.0379	0.755723	30.5017	0.43868	37.0879	2.55351	40	0	5.91932	1.37174	9.70566	2.05049	7.24838	0.306445	9.7417	0.393468	15.2768	2.41055	19.2614	0.160044
P2RY11-Hs00267414_s1	Target	25.8573	0.569981	24.5683	0.522452	27.025	0.741219	21.4746	0.545151	24.1535	0.299753	24.1282	0.172018	4.82895	0.535466	3.61754	0.741672	4.23548	0.367274	0.714567	0.029929	2.3424	0.0762436	3.38963	0.10397
P2RY12-Hs00224470_m1	Target	31.1014	1.50262	28.061	0.615976	29.3794	1.42749	40	0	28.6209	0.422774	30.9072	0.455241	10.073	1.51587	7.11024	0.654122	6.58984	0.93522	19.24	0.565314	6.80973	0.210511	10.1686	0.588643
P2RY13-Hs00256749_s1	Target	25.3828	1.03066	23.8721	0.294525	22.672	1.35681	28.8933	0.901462	30.4555	0.109804	30.0268	0.308857	4.3544	1.06497	2.92136	0.277645	-0.11754	0.564498	8.1333	0.897151	8.64443	0.250788	9.28827	0.290818
P2RY14-Hs00208434_m1	Target	30.3608	1.37003	27.8744	0.85356	29.8262	0.817315	32.0603	0.664552	33.0819	0.717052	40	0	9.3325	1.39058	6.92366	1.03571	7.03668	0.47338	11.3003	0.100875	11.2707	0.406373	19.2614	0.160044
P2RY2-Hs00175732_m1	Target	27.2232	1.02965	27.0342	0.880636	24.9298	1.23326	26.774	0.507307	25.6429	0.656484	24.677	0.102323	6.19487	0.985575	6.08342	0.661215	2.1403	0.989414	6.014	0.157216	3.83173	0.3299	3.93847	0.152101
P2RY4-Hs00267404_s1	Target	31.2932	1.17413	32.511	1.31958	31.9982	2.07631	29.6228	0.639514	30.0637	0.534815	30.8499	0.581739	10.2648	1.17611	11.5603	1.32127	9.2086	1.48566	8.86277	0.519352	8.25263	0.433643	10.1113	0.429328
P2RY5-Hs00271758_s1	Target	25.8363	0.794639	24.3768	0.297836	25.4702	0.709369	24.0182	0.604353	22.7622	0.294663	28.1703	0.297793	4.80795	0.788804	3.42606	0.561095	2.68068	0.29195	3.25813	0.102927	0.9511	0.193387	7.43167	0.164316
P2RY6-Hs00173683_m1	Target	38.4655	3.069	40	0	40	0	38.0817	3.32265	32.7079	0.333846	40	0	17.4371	3.04737	19.0493	0.284944	17.2105	0.848364	17.3216	2.81378	10.8968	0.0711008	19.2614	0.160044
P2RY8-Hs00736776_m1	Target	26.8954	0.72561	26.3802	0.486525	24.1621	0.571602	29.2438	0.295432	24.0389	0.472678	22.6749	0.161887	5.867	0.7243	5.4295	0.546747	1.37254	0.692951	8.4838	0.270459	2.22783	0.170757	1.93633	0.113257
PCDH15-Hs00263709_m1	Target	40	0	40	0	40	0	40	0	34.8187	1.62244	40	0	18.9717	0.0461938	19.0493	0.284944	17.2105	0.848364	19.24	0.565314	13.0075	1.93842	19.2614	0.160044
PGK1-Hs99999906_m1	Selected Control	19.7207	0.37421	19.4304	0.38559	20.9238	0.542368	19.4623	0.509727	20.7791	0.278673	18.7989	0.132706	-1.30767	0.413332	-1.52038	0.185795	-1.86572	0.378276	-1.29767	0.0867109	-1.032	0.107711	-1.93963	0.02794
PHGDH-Hs00198333_m1	Target	28.5939	2.20814	26.5854	1.24438	32.093	0.951851	29.7411	0.789661	27.5724	0.38284	22.3204	0.315442	7.56555	2.20189	5.63462	1.43486	9.30352	0.764935	8.9811	0.237655	5.76123	0.132303	1.58183	0.178308
POLR2A-Hs00172187_m1	Selected Control	23.1147	0.195866	23.4688	0.305877	24.0402	0.568213	22.9556	0.493868	23.1905	0.59063	22.6216	0.164836	2.08635	0.221177	2.51812	0.444684	1.25062	0.4373	2.19557	0.0772804	1.3794	0.262801	1.8831	0.247045
PPIA-Hs99999904_m1	Selected Control	18.6315	0.162428	18.3302	0.189921	20.6469	0.670576	18.0094	0.483067	18.8898	0.360561	17.792	0.149208	-2.39683	0.16092	-2.62058	0.184322	-2.14266	0.282894	-2.7506	0.0970468	-2.92127	0.0360739	-2.9466	0.0654057
PPYR1-Hs00275980_s1	Target	36.0851	2.68269	32.1278	4.63482	37.831	4.85012	34.3253	5.60058	36.3622	3.21202	40	0	15.0567	2.7134	11.177	4.85742	15.0414	4.59873	13.5653	5.38657	14.5511	3.05388	19.2614	0.160044
PTAFR-Hs00265392_s1	Target	22.3649	0.316301	23.2453	0.119839	23.6102	1.12953	27.3531	0.563472	31.382	0.906586	24.0504	0.132717	1.33648	0.356516	2.29462	0.296475	0.82072	0.307644	6.59313	0.20181	9.57087	0.579318	3.3118	0.0476693
PTGDR-Hs00235003_m1	Target	32.8459	3.21265	39.1511	1.89811	38.0019	1.76773	40	0	39.6515	0.603677	39.9846	0.0266158	11.8175	3.19466	18.2004	2.12629	15.2123	1.66143	19.24	0.565314	17.8404	0.285993	19.2461	0.142619
PTGER1-Hs00168752_m1	Target	36.0692	4.81285	34.6891	1.51008	40	0	33.3975	0.861147	28.9141	0.204422	40	0	15.0408	4.77655	13.7384	1.67678	17.2105	0.848364	12.6374	0.387324	7.10297	0.31902	19.2614	0.160044
PTGER2-Hs00168754_m1	Target	24.3482	0.376101	27.0879	1.45956	25.1271	1.20974	26.4126	0.556555	27.8699	0.288362	24.4805	0.264225	3.31983	0.384986	6.13718	1.26544	2.3375	0.801475	5.65257	0.0574328	6.05877	0.155179	3.7419	0.104227
PTGER3-Hs00168755_m1	Target	28.1571	1.38535	26.9333	1.92663	35.7048	4.00881	33.3907	0.103958	30.0407	0.263324	40	0	7.1288	1.37134	5.9826	2.15267	12.9153	3.29034	12.6307	0.476562	8.22963	0.53973	19.2614	0.160044
PTGER4-Hs00168761_m1	Target	22.315	0.159982	24.8179	1.37255	24.134	1.22079	22.9537	0.679541	24.7036	0.393699	25.2808	0.246858	1.28665	0.150964	3.86714	1.59942	1.34444	0.520744	2.19367	0.11485	2.89253	0.13703	4.54223	0.117881
PTGFR-Hs00168763_m1	Target	34.5479	3.63688	37.0521	6.5917	31.2072	1.75016	40	0	36.1244	3.38602	33.2725	1.89323	13.5195	3.5944	16.1014	6.37626	8.41766	1.57147	19.24	0.565314	14.3133	3.15242	12.5339	1.73391
PTGIR-Hs00168765_m1	Target	27.8087	0.527625	27.4087	0.479218	25.7413	0.423901	32.5702	1.01206	28.0725	0.502229	29.9648	0.0832457	6.78032	0.483545	6.45794	0.323984	2.95174	0.480669	11.8101	0.493123	6.26137	0.196973	9.22623	0.0879142
PTHR1-Hs00174895_m1	Target	40	0	31.5562	8.52027	37.6068	3.28662	40	0	32.9649	1.18492	40	0	18.9717	0.0461938	10.6054	8.44985	14.8173	3.29033	19.24	0.565314	11.1538	1.15478	19.2614	0.160044
PTHR2-Hs00175044_m1	Target	30.4422	0.932396	32.0608	0.97937	30.8176	1.72721	25.0221	0.799495	40	0	40	0	9.41378	0.92701	11.11	0.983545	8.02814	1.76106	4.2621	0.234194	18.1889	0.327999	19.2614	0.160044
PTPN22-Hs00247352_m1	Target	29.1739	0.92192	29.1448	1.16514	30.0102	1.16844	28.5238	0.608421	34.1704	1.31735	31.4672	1.30625	8.14555	0.899486	8.19408	1.06012	7.22066	0.94381	7.7638	0.100463	12.3593	1.3594	10.7286	1.16588
RARS-Hs00259879_m1	Target	23.6893	0.115202	23.6531	0.29659	25.6586	1.48276	22.4885	0.698009	23.5863	0.42926	22.6802	0.0879634	2.6609	0.131551	2.70236	0.229333	2.8691	0.656802	1.7285	0.14255	1.77513	0.104283	1.94163	0.0951767
RGR-Hs00173619_m1	Target	40	0	39.9684	0.070615	40	0	40	0	40	0	40	0	18.9717	0.0461938	19.0177	0.235342	17.2105	0.848364	19.24	0.565314	18.1889	0.327999	19.2614	0.160044
RHO-Hs00173452_m1	Target	37.2078	3.22564	30.9814	1.04873	38.8842	2.495	31.359	0.522967	40	0	38.6691	2.30513	16.1795	3.18732	10.0306	1.0061	16.0947	3.25611	10.5989	0.167808	18.1889	0.327999	17.9306	2.46033
RLN3R1-Hs00275435_s1	Target	38.1528	3.69435	40	0	37.7988	4.92199	36.3365	6.34537	37.7194	3.95017	40	0	17.1245	3.69594	19.0493	0.284944	15.0093	4.66952	15.5765	6.43288	15.9082	3.62746	19.2614	0.160044
RPLP0-Hs99999902_m1	Selected Control	20.3999	0.606182	19.6878	0.2668	20.8186	1.35324	18.092	0.51376	19.1793	0.421165	18.3228	0.230572	-0.62845	0.605466	-1.26296	0.370715	-1.971	0.598399	-2.66803	0.0529159	-2.63183	0.0976515	-2.41577	0.0735851
RRH-Hs00173841_m1	Target	40	0	39.747	0.565815	38.5362	3.2732	40	0	40	0	40	0	18.9717	0.0461938	18.7962	0.393152	15.7466	4.02887	19.24	0.565314	18.1889	0.327999	19.2614	0.160044
SCTR-Hs00161610_m1	Target	38.2318	3.5364	39.2085	1.76989	39.2416	1.69579	40	0	40	0	38.2421	3.04471	17.2035	3.51413	18.2577	1.99857	16.4521	1.58529	19.24	0.565314	18.1889	0.327999	17.5036	3.00613
SENP3-Hs00210359_m1	Target	23.9053	0.36138	23.9189	0.27242	24.5412	0.900914	24.7402	0.574267	25.061	0.273471	23.0712	0.216877	2.87697	0.376443	2.96822	0.342635	1.75166	0.34639	3.98013	0.199103	3.24987	0.171159	2.33263	0.15785
SLC26A7-Hs00369311_m1	Target	33.5823	0.864895	35.1084	2.80698	40	0	32.0425	0.595973	28.7708	0.469493	37.4125	2.33562	12.5539	0.87277	14.1576	2.79986	17.2105	0.848364	11.2825	0.774164	6.95963	0.15911	16.674	2.19996
SMO-Hs00170665_m1	Target	33.787	4.15593	29.8275	0.399809	31.2039	0.981322	40	0	30.2201	0.541311	35.7166	3.73101	12.7586	4.1144	8.87676	0.474097	8.41438	1.40499	19.24	0.565314	8.409	0.244051	14.9781	3.58181
SSTR1-Hs00265617_s1	Target	40	0	40	0	38.1691	4.09411	36.4871	6.08452	40	0	40	0	18.9717	0.0461938	19.0493	0.284944	15.3795	3.85601	15.7271	6.17307	18.1889	0.327999	19.2614	0.160044
SSTR2-Hs00265624_s1	Target	29.2058	1.03554	26.3024	1.26564	33.8673	3.89809	29.1347	1.52169	29.5457	0.517175	29.2721	0.0472069	8.1774	1.01737	5.3516	1.27508	11.0778	3.22581	8.37463	1.54668	7.73457	0.194804	8.53357	0.114926
SSTR3-Hs00265633_s1	Target	32.4303	1.61784	38.6189	3.08814	35.7624	4.22312	34.6028	5.31006	33.9629	0.882507	34.8704	4.58461	11.4019	1.63327	17.6682	2.87596	12.9729	3.52316	13.8427	5.09436	12.1518	1.19045	14.1318	4.42457
SSTR4-Hs00265639_s1	Target	40	0	40	0	39.3946	1.35372	38.878	1.9433	40	0	40	0	18.9717	0.0461938	19.0493	0.284944	16.6051	1.29935	18.118	2.08341	18.1889	0.327999	19.2614	0.160044
SSTR5-Hs00265647_s1	Target	38.6745	2.65095	40	0	38.2342	3.94845	37.0325	5.13992	40	0	28.9353	0.205377	17.6462	2.65265	19.0493	0.284944	15.4447	3.71349	16.2724	5.23309	18.1889	0.327999	8.1967	0.114928
SUCNR1-Hs00263701_m1	Target	26.7596	0.734135	23.9945	0.583117	32.1863	0.782162	23.1658	0.742835	28.108	0.446025	22.8657	0.212422	5.73123	0.76514	3.04374	0.362515	9.39676	1.01927	2.40573	0.213667	6.29687	0.170829	2.12717	0.111997
TAAR1-Hs00373229_s1	Target	36.7696	3.80763	36.9026	4.26421	36.8595	4.63353	36.4866	6.08545	40	0	40	0	15.7413	3.79325	15.9519	4.12154	14.07	4.16855	15.7265	6.17399	18.1889	0.327999	19.2614	0.160044
TAAR2-Hs00274365_s1	Target	39.4462	1.1075	40	0	38.1765	4.07751	36.6311	5.83505	40	0	40	0	18.4179	1.10976	19.0493	0.284944	15.3869	3.83973	15.8711	5.92468	18.1889	0.327999	19.2614	0.160044
TAAR5-Hs00269590_s1	Target	38.2412	3.5176	40	0	37.988	4.49888	36.6624	5.78084	40	0	40	0	17.2129	3.5192	19.0493	0.284944	15.1985	4.25309	15.9024	5.87071	18.1889	0.327999	19.2614	0.160044
TAAR6-Hs00601838_s1	Target	38.5366	1.71207	38.9074	2.44317	37.9255	3.07606	36.9883	5.21642	37.6145	2.12544	38.1036	3.28472	17.5082	1.6973	17.9566	2.23268	15.1359	3.15098	16.2283	5.30916	15.8033	2.43	17.365	3.17438
TAAR8-Hs00369650_s1	Target	38.6589	2.68215	40	0	37.9907	4.49293	36.4702	6.11374	40	0	40	0	17.6306	2.68385	19.0493	0.284944	15.2012	4.2472	15.7102	6.20216	18.1889	0.327999	19.2614	0.160044
TAAR9-Hs00601815_s1	Target	37.7954	3.65187	38.1063	4.23435	36.4112	4.32552	36.2325	6.08461	38.119	3.25805	39.4668	0.923472	16.7671	3.64991	17.1556	4.0205	13.6216	3.94053	15.4725	6.14964	16.3079	2.93538	18.7283	0.819056
TACR1-Hs00185530_m1	Target	40	0	38.9848	2.2701	40	0	40	0	38.5603	2.49358	40	0	18.9717	0.0461938	18.034	2.06025	17.2105	0.848364	19.24	0.565314	16.7492	2.7153	19.2614	0.160044
TACR2-Hs00169052_m1	Target	30.1255	0.700488	31.5132	0.93397	33.543	1.48044	32.5183	0.651053	37.0994	0.574466	31.4002	0.051919	9.0971	0.685577	10.5625	0.755778	10.7534	1.03355	11.7583	0.191464	15.2883	0.801461	10.6616	0.111954
TACR3-Hs00357277_m1	Target	40	0	38.8244	2.62881	38.9264	1.89751	40	0	40	0	40	0	18.9717	0.0461938	17.8736	2.41774	16.1369	2.62877	19.24	0.565314	18.1889	0.327999	19.2614	0.160044
TAS1R1-Hs00371023_m1	Target	40	0	38.6414	2.16578	39.847	0.342029	40	0	40	0	40	0	18.9717	0.0461938	17.6907	2.04062	17.0575	0.786396	19.24	0.565314	18.1889	0.327999	19.2614	0.160044
TBP-Hs99999910_m1	Selected Control	25.2217	0.344156	25.6608	0.302246	26.3235	1.12739	24.8072	0.536749	25.6764	0.298258	25.1585	0.403408	4.1933	0.331319	4.71006	0.366896	3.53402	0.375999	4.04717	0.0326008	3.86533	0.279009	4.41997	0.277827
TBXA2R-Hs00169054_m1	Target	30.2831	0.971438	26.8125	0.453358	34.5105	3.32474	30.4619	0.108215	24.1779	0.424795	24.2521	0.438642	9.2547	0.994701	5.86174	0.501995	11.721	3.57659	9.7019	0.586805	2.36677	0.197281	3.51357	0.331218
TFRC-Hs99999911_m1	Selected Control	18.5266	0.444889	19.1932	0.653223	26.0807	1.08554	20.9324	0.495806	22.8827	0.311514	21.7188	0.210562	-2.50183	0.448904	-1.75752	0.429451	3.29116	0.292026	0.172433	0.0965947	1.07157	0.0837412	0.980233	0.0858863
TM7SF1-Hs00162803_m1	Target	22.1021	0.150746	22.5811	0.424307	26.4707	1.71858	22.1174	0.660178	25.2529	0.245402	25.3064	0.286584	1.07375	0.173747	1.63032	0.297734	3.6811	0.991655	1.35737	0.190137	3.44177	0.173942	4.5678	0.187932
TRBV5-4-Hs00233314_m1	Target	24.2265	1.02086	36.0505	3.67121	31.7964	0.707874	28.6336	0.573785	38.4851	2.62394	40	0	3.19817	1.02448	15.0998	3.78449	9.00686	1.08615	7.87357	0.58201	16.674	2.30142	19.2614	0.160044
TRHR-Hs00175019_m1	Target	40	0	40	0	40	0	40	0	40	0	40	0	18.9717	0.0461938	19.0493	0.284944	17.2105	0.848364	19.24	0.565314	18.1889	0.327999	19.2614	0.160044
TSHR-Hs00174910_m1	Target	40	0	40	0	40	0	38.0703	3.3424	36.4692	3.0642	40	0	18.9717	0.0461938	19.0493	0.284944	17.2105	0.848364	17.3102	3.45136	14.6581	3.39055	19.2614	0.160044
UTS2R-Hs00255820_s1	Target	36.7777	2.29419	33.9402	3.20592	35.5308	4.14743	26.747	0.959833	31.1334	0.200568	33.6168	1.44671	15.7494	2.25851	12.9895	3.23385	12.7413	4.82482	5.987	0.395707	9.3223	0.192611	12.8782	1.32061
VIPR1-Hs00270351_m1	Target	31.7422	1.3135	26.8789	1.18829	24.4042	0.48205	24.6698	0.597988	26.4919	0.584013	35.0715	1.45245	10.7138	1.28612	5.92818	1.08249	1.61466	0.480173	3.90977	0.18056	4.68077	0.256232	14.3329	1.30247
VIPR2-Hs00173643_m1	Target	31.3525	2.86774	40	0	39.9284	0.160147	37.9703	3.51549	32.9982	0.673537	40	0	10.3241	2.85051	19.0493	0.284944	17.1388	0.990016	17.2103	3.62225	11.187	0.942942	19.2614	0.160044
VN1R1-Hs00252888_s1	Target	28.9038	0.915707	26.919	0.362449	28.2674	1.11024	24.4582	0.605389	27.1188	0.293576	28.6727	0.159507	7.87545	0.886078	5.96826	0.335734	5.47786	0.582416	3.69817	0.254803	5.30767	0.0854656	7.93407	0.00990269
VN1R2-Hs00545195_s1	Target	40	0	36.1791	3.5041	38.1258	4.19075	33.1327	2.67184	40	0	40	0	18.9717	0.0461938	15.2284	3.48098	15.3363	3.95063	12.3726	2.8181	18.1889	0.327999	19.2614	0.160044
VN1R5-Hs00545219_s1	Target	33.8805	2.67435	34.0458	0.797313	36.9819	4.48298	31.2254	2.20757	32.741	0.879195	36.2952	3.45073	12.8521	2.7107	13.0951	0.832818	14.1924	4.1029	10.4654	2.26713	10.9299	0.56643	15.5566	3.32293
XCR1-Hs00245540_s1	Target	30.9579	2.8565	33.4258	3.71604	28.5432	1.18547	30.5759	1.56778	33.1265	1.31985	29.1389	0.219352	9.92952	2.82261	12.4751	3.65157	5.75372	0.854493	9.81587	1.53382	11.3154	0.993761	8.40037	0.370201
* EDG5 was replaced by GPR119 by Applied Biosystems and is no longer available in GPCR TaqMan arrays

## Sheet: Ion Channels raw data
Ion Channels		Average Ct values all Ion Channel primer/probe sets												Average delta Ct values all Ion Channels primer/probe sets
		Macrophages		MDMs		Monocytes		HL60		THP1		U937		Macrophages		MDMs		Monocytes		HL60		THP1		U937
Gene - Applied Biosystems code	Type	Average	SD	Average	SD	Average	SD	Average	SD	Average	SD	Average	SD	Average	SD	Average	SD	Average	SD	Average	SD	Average	SD	Average	SD
ABCC8-Hs01093761_m1	Target	40	0	39.2818	1.60585	40	0	39.5441	0.7897	40	0	40	0	19.3321	0.821912	19.1904	1.57011	17.7348	1.02363	19.8538	1.17149	19.2009	0.219079	20.0705	0.0991437
ABCC9-Hs00245832_m1	Target	40	0	40	0	40	0	38.2637	3.00736	39.7639	0.408995	40	0	19.3321	0.821912	19.9085	0.195795	17.7348	1.02363	18.5734	2.58742	18.9647	0.510199	20.0705	0.0991437
ACCN1-Hs00153756_m1	Target	38.8894	2.48329	38.6422	3.03613	40	0	37.7221	3.94538	40	0	40	0	18.2216	2.54465	18.5507	3.00004	17.7348	1.02363	18.0319	4.30028	19.2009	0.219079	20.0705	0.0991437
ACCN2-Hs00241630_m1	Target	35.6479	4.176	27.5822	0.877856	40	0	28.5538	0.684702	26.8131	0.308455	24.7038	0.252321	14.98	3.87188	7.49074	0.964619	17.7348	1.02363	8.86353	0.243393	6.01393	0.089412	4.77433	0.344013
ACCN2-Hs00252235_m1	Target	40	0	34.0533	3.34641	40	0	35.4261	4.20132	32.5941	0.770335	29.3456	0.535031	19.3321	0.821912	13.9618	3.42156	17.7348	1.02363	15.7358	4.29775	11.7949	0.722098	9.41613	0.495805
ACCN3-Hs00245097_m1	Target	29.5977	0.471267	28.0175	0.48098	31.0246	1.49137	27.8421	0.611321	30.6895	0.156495	28.728	0.0776458	8.9298	0.724912	7.92604	0.474797	8.75942	0.49459	8.1518	0.322264	9.89037	0.374939	8.7985	0.145795
ACCN3-Hs01011610_g1	Target	28.6005	0.657792	27.4132	0.651552	28.8878	1.1003	27.0773	0.288579	27.3754	0.321098	27.3106	0.153492	7.93264	0.745727	7.3217	0.653003	6.62268	0.432582	7.3871	0.337599	6.57623	0.113201	7.3811	0.0907385
ACCN4-Hs00539623_m1	Target	38.6377	3.04611	38.9176	2.42028	38.8219	2.63427	32.8335	0.863211	35.9605	3.5032	39.3287	1.16267	17.9699	2.97283	18.8261	2.61206	16.5567	2.60028	13.1432	0.774956	15.1613	3.34237	19.3992	1.22391
ACCN5-Hs00294860_m1	Target	36.6753	2.26529	38.5749	2.61013	39.5058	0.720983	40	0	38.5098	2.58104	38.2498	3.03138	16.0074	2.09724	18.4834	2.79256	17.2407	0.972006	20.3097	0.451326	17.7107	2.3706	18.3203	3.09104
ACTB-Hs99999903_m1	Selected Control	18.4751	2.12519	16.9946	0.251809	18.4747	1.20874	16.4062	0.416945	18.0049	0.15362	17.4789	0.271968	-2.19274	1.35729	-3.09684	0.128604	-3.7905	0.329116	-3.28407	0.0643873	-2.7943	0.263801	-2.45063	0.219254
ACTN1-Hs00998100_m1	Selected Control	20.5441	0.615796	19.6416	0.251218	22.8283	1.07439	20.196	0.453045	19.8193	0.151537	20.1045	0.175893	-0.12374	0.30623	-0.44994	0.237408	0.56312	0.112542	0.505667	0.0808169	-0.979833	0.0993945	0.174967	0.187838
ANO1-Hs00216121_m1	Target	36.2761	3.47544	36.6487	3.07573	39.1782	1.8376	37.0171	5.16659	38.2012	3.11561	31.3436	0.209329	15.6082	3.14717	16.5572	3.18971	16.913	2.81731	17.3268	5.51937	17.4021	3.27534	11.4141	0.305461
ANO10-Hs00216307_m1	Target	24.8338	0.350848	23.8715	0.399303	26.0593	0.844867	26.2265	0.491925	25.7666	0.270019	24.8377	0.272681	4.16598	0.6304	3.77998	0.491586	3.79418	0.447204	6.53627	0.1284	4.96747	0.0941528	4.9082	0.241519
ANO2-Hs00220570_m1	Target	37.3235	3.6736	32.5231	1.21533	40	0	29.8209	2.49941	38.3596	2.8412	37.2338	4.79114	16.6556	3.55897	12.4316	1.20432	17.7348	1.02363	10.1306	2.70078	17.5605	2.904	17.3043	4.85043
ANO3-Hs00230040_m1	Target	40	0	38.8956	2.46947	40	0	38.6134	2.40172	33.6362	0.202554	40	0	19.3321	0.821912	18.8041	2.43479	17.7348	1.02363	18.9231	2.76213	12.8371	0.0866396	20.0705	0.0991437
ANO4-Hs00400770_m1	Target	38.6752	2.96225	37.9084	4.67696	40	0	38.9802	1.76635	40	0	40	0	18.0074	2.89217	17.8169	4.63871	17.7348	1.02363	19.2899	2.13139	19.2009	0.219079	20.0705	0.0991437
ANO5-Hs01381106_m1	Target	27.0244	0.97624	24.8678	0.71304	29.1408	0.82701	37.9713	3.51387	26.4393	0.0157068	38.7814	2.11062	6.35658	0.690986	4.7763	0.600956	6.87568	0.369294	18.281	3.09318	5.64013	0.224209	18.8519	2.15246
ANO6-Hs01374899_m1	Target	23.7136	1.10278	23.1396	0.224132	24.5591	1.54578	21.9335	0.429149	23.2919	0.397351	23.9592	0.166391	3.04576	0.296587	3.04808	0.135278	2.29388	0.549336	2.24323	0.158867	2.49273	0.193495	4.0297	0.130709
ANO7-Hs00330215_m1	Target	37.6916	3.16284	34.1211	1.18704	36.6438	3.08875	30.9432	0.214904	35.5234	3.87688	40	0	17.0237	3.67692	14.0296	1.2297	14.3786	3.50346	11.253	0.475314	14.7243	3.72461	20.0705	0.0991437
ANO7-Hs00418109_m1	Target	40	0	40	0	40	0	40	0	36.0805	3.39832	40	0	19.3321	0.821912	19.9085	0.195795	17.7348	1.02363	20.3097	0.451326	15.2814	3.33965	20.0705	0.0991437
ANO8-Hs00326325_m1	Target	27.3778	0.417342	27.8146	0.242505	28.3818	0.91844	29.1959	0.0732533	25.3513	0.311396	25.4652	0.0747961	6.70996	0.838169	7.72312	0.388308	6.11672	0.280364	9.50557	0.378175	4.5521	0.0923981	5.5357	0.142811
ANO9-Hs00413380_g1	Target	29.1589	1.24181	31.2611	1.03999	36.4231	3.36323	29.6531	0.372073	34.7571	0.252094	37.6048	4.14861	8.491	1.21947	11.1696	0.992813	14.1579	2.89424	9.9628	0.211483	13.9579	0.379252	17.6753	4.208
AQP1-Hs00166067_m1	Target	33.6662	1.27315	34.7365	2.99428	38.963	2.31871	31.5179	0.221598	33.2194	0.219182	38.2618	3.01071	12.9983	0.923358	14.645	3.08841	16.6979	2.16964	11.8277	0.3345	12.4203	0.391639	18.3323	3.07038
AQP10-Hs00369738_m1	Target	40	0	40	0	38.873	2.52	39.1256	1.51456	40	0	40	0	19.3321	0.821912	19.9085	0.195795	16.6078	2.27206	19.4353	1.88228	19.2009	0.219079	20.0705	0.0991437
AQP11-Hs00542681_m1	Target	30.4686	0.692292	31.411	0.423276	37.9359	2.833	29.9969	0.742314	31.3757	0.900528	30.5974	0.275977	9.80072	0.909718	11.3195	0.403691	15.6707	2.7697	10.3066	0.406336	10.5765	0.946195	10.6678	0.177642
AQP12A-Hs01651302_g1	Target	37.8785	2.90849	33.7601	2.4804	38.4829	3.39238	36.6336	5.83072	40	0	40	0	17.2106	3.52991	13.6686	2.50096	16.2177	3.3132	16.9434	5.92667	19.2009	0.219079	20.0705	0.0991437
AQP12B-Hs01651303_m1	Target	40	0	40	0	40	0	40	0	40	0	40	0	19.3321	0.821912	19.9085	0.195795	17.7348	1.02363	20.3097	0.451326	19.2009	0.219079	20.0705	0.0991437
AQP12B-Hs01374500_m1	Target	40	0	38.7045	2.89687	40	0	40	0	40	0	40	0	19.3321	0.821912	18.613	2.86107	17.7348	1.02363	20.3097	0.451326	19.2009	0.219079	20.0705	0.0991437
AQP2-Hs00166640_m1	Target	40	0	37.5169	2.3356	40	0	40	0	38.8903	1.92211	40	0	19.3321	0.821912	17.4254	2.3872	17.7348	1.02363	20.3097	0.451326	18.0911	1.71194	20.0705	0.0991437
AQP2-Hs00292214_s1	Target	35.1135	3.31832	30.4839	0.572977	37.8511	4.80518	33.9123	5.92776	40	0	40	0	14.4457	3.73432	10.3925	0.71109	15.5859	4.67992	14.222	5.76884	19.2009	0.219079	20.0705	0.0991437
AQP3-Hs00185020_m1	Target	23.7289	1.27531	23.8692	0.827707	31.6511	0.723557	24.489	0.539679	27.2602	0.464873	36.0289	3.60109	3.06108	1.26379	3.77768	0.785651	9.3859	1.03564	4.79873	0.197291	6.46107	0.262015	16.0994	3.69848
AQP4-Hs00242342_m1	Target	32.8609	0.724489	40	0	40	0	39.1924	1.39875	40	0	40	0	12.193	1.28766	19.9085	0.195795	17.7348	1.02363	19.5021	1.76795	19.2009	0.219079	20.0705	0.0991437
AQP5-Hs00387048_m1	Target	32.5707	1.929	35.6602	3.40547	37.6689	3.21834	40	0	39.982	0.0312346	40	0	11.9028	1.78468	15.5687	3.48452	15.4037	4.1605	20.3097	0.451326	19.1828	0.189101	20.0705	0.0991437
AQP6-Hs00155808_m1	Target	40	0	33.4317	1.14534	40	0	36.4406	3.08259	40	0	40	0	19.3321	0.821912	13.3402	1.21655	17.7348	1.02363	16.7503	3.03885	19.2009	0.219079	20.0705	0.0991437
AQP7-Hs00357359_m1	Target	38.8394	2.59518	38.5092	3.33362	40	0	37.6391	4.08914	36.0874	3.40727	40	0	18.1715	2.43289	18.4177	3.29702	17.7348	1.02363	17.9488	3.66791	15.2882	3.61204	20.0705	0.0991437
AQP8-Hs01086280_g1	Target	30.6227	1.73338	28.8029	0.758983	34.7153	3.06706	30.0338	1.20584	28.1961	0.747299	28.385	1.20766	9.9548	2.19698	8.71138	0.817654	12.4502	2.06447	10.3436	1.47949	7.397	0.603165	8.45553	1.26439
AQP9-Hs00175573_m1	Target	20.5801	0.683591	21.3724	0.388159	23.0114	0.785671	22.5098	0.538241	32.1295	0.961098	25.1079	0.0770395	-0.08772	0.598123	1.28088	0.404313	0.74618	0.777247	2.81957	0.0892553	11.3304	0.742872	5.1784	0.029895
B2M-Hs99999907_m1	Selected Control	15.8658	0.887813	16.8113	0.251778	18.0148	1.20879	17.1605	0.440567	17.8037	0.290875	18.0862	0.0976224	-4.80208	0.188381	-3.28018	0.180126	-4.25038	0.252958	-2.5298	0.0117154	-2.99547	0.0718133	-1.84327	0.113051
CACHD1-Hs00326087_m1	Target	32.0786	1.10369	33.4016	3.72992	33.0952	1.75235	28.7699	0.293012	28.9098	0.525215	29.9664	0.7432	11.4107	0.826298	13.3101	3.82444	10.83	1.82629	9.07963	0.179992	8.1107	0.31378	10.0369	0.680739
CACNA1A-Hs01579431_m1	Target	39.6165	0.857532	38.9193	2.41661	39.8969	0.230449	35.3071	4.10058	21.3935	0.205353	30.0093	0.515162	18.9486	0.979131	18.8278	2.37693	17.6318	0.996843	15.6168	3.81185	0.594367	0.0565743	10.0798	0.426227
CACNA1B-Hs01053090_m1	Target	37.9896	2.7535	40	0	40	0	40	0	35.28	4.10621	35.8409	3.71019	17.3217	3.40938	19.9085	0.195795	17.7348	1.02363	20.3097	0.451326	14.4808	4.31159	15.9114	3.69449
CACNA1C-Hs00167681_m1	Target	38.4561	3.45235	38.8258	2.62568	40	0	27.7814	0.105439	38.1819	3.14898	31.1599	0.289852	17.7882	3.36583	18.7343	2.8174	17.7348	1.02363	8.09107	0.345958	17.3828	2.9384	11.2304	0.319227
CACNA1D-Hs00167753_m1	Target	35.6649	4.00882	35.6031	2.51882	33.0719	1.72863	38.2008	3.11625	31.9028	0.456651	33.6247	1.20794	14.9971	3.67822	15.5116	2.57648	10.8068	0.750729	18.5105	3.22632	11.1037	0.33773	13.6952	1.11859
CACNA1E-Hs00167789_m1	Target	40	0	40	0	40	0	32.1153	0.586915	30.017	0.0948102	33.5945	0.873696	19.3321	0.821912	19.9085	0.195795	17.7348	1.02363	12.425	1.03777	9.2179	0.201225	13.6649	0.883996
CACNA1F-Hs00193172_m1	Target	39.5208	1.07143	38.8478	1.48075	38.2564	1.62935	38.5867	1.32693	40	0	40	0	18.853	1.29038	18.7564	1.41884	15.9912	1.53231	18.8964	1.68704	19.2009	0.219079	20.0705	0.0991437
CACNA1G-Hs00367969_m1	Target	35.1263	3.23654	32.3493	0.798527	40	0	26.0194	0.45726	28.8209	0.404762	40	0	14.4584	3.17644	12.2578	0.804664	17.7348	1.02363	6.32907	0.082946	8.02173	0.187188	20.0705	0.0991437
CACNA1H-Hs01103523_m1	Target	35.0994	2.92116	40	0	39.7168	0.633254	40	0	40	0	40	0	14.4315	3.12766	19.9085	0.195795	17.4516	0.989917	20.3097	0.451326	19.2009	0.219079	20.0705	0.0991437
CACNA1I-Hs00184168_m1	Target	38.0586	2.66147	37.5096	2.29968	40	0	40	0	38.2537	3.02468	35.9393	3.71997	17.3908	2.50249	17.4181	2.22212	17.7348	1.02363	20.3097	0.451326	17.4546	3.18451	16.0098	3.81674
CACNA1S-Hs00163885_m1	Target	40	0	40	0	40	0	40	0	40	0	40	0	19.3321	0.821912	19.9085	0.195795	17.7348	1.02363	20.3097	0.451326	19.2009	0.219079	20.0705	0.0991437
CACNA2D1-Hs00167808_m1	Target	37.1722	3.87414	33.099	4.17849	40	0	39.371	1.08952	30.6459	0.602098	40	0	16.5043	3.5841	13.0075	4.24177	17.7348	1.02363	19.6807	1.46381	9.8468	0.428525	20.0705	0.0991437
CACNA2D1-Hs00984856_m1	Target	36.526	3.23245	34.0865	3.74256	38.9494	2.34912	35.9739	6.97341	31.2831	1.41588	33.5418	2.57139	15.8582	2.89577	13.9951	3.80013	16.6843	2.197	16.2836	7.3243	10.484	1.37087	13.6122	2.63981
CACNA2D2-Hs00195772_m1	Target	30.0932	2.28937	32.0938	1.16361	36.1448	3.25798	38.8908	1.92119	36.6139	3.03666	33.6587	1.66494	9.42532	2.87835	12.0023	1.32265	13.8797	3.46575	19.2005	2.28489	15.8147	2.84803	13.7292	1.75638
CACNA2D2-Hs01021049_m1	Target	30.3145	2.06223	32.4861	1.01904	37.7085	3.14046	39.3287	1.16273	36.6134	2.93331	33.1361	1.60685	9.6467	2.59347	12.3947	1.13382	15.4433	3.09087	19.6384	1.53563	15.8142	3.1459	13.2066	1.70066
CACNA2D3-Hs00218157_m1	Target	40	0	40	0	40	0	36.5951	3.80126	40	0	40	0	19.3321	0.821912	19.9085	0.195795	17.7348	1.02363	16.9048	4.03944	19.2009	0.219079	20.0705	0.0991437
CACNA2D3-Hs01045030_m1	Target	33.4432	3.89131	27.2682	1.00269	24.682	1.02437	30.1461	3.21225	29.7084	0.460652	26.7028	1.3633	12.7753	4.09111	7.17666	1.11668	2.41686	0.437984	10.4558	3.57582	8.90923	0.536561	6.77333	1.455
CACNA2D4-Hs00297782_m1	Target	33.252	1.41738	29.4228	0.687786	31.7383	0.544613	25.4472	0.349641	27.406	0.506108	28.4533	0.327172	12.5841	1.75415	9.33132	0.825162	9.47314	1.22779	5.75687	0.10178	6.6069	0.316777	8.5238	0.304554
CACNB1-Hs00609497_m1	Target	28.2238	1.19346	29.2194	0.752577	27.804	1.31177	28.7365	0.256836	27.6244	0.340423	30.9884	1.32014	7.55594	1.19684	9.1279	0.868728	5.53888	0.335594	9.0462	0.225058	6.8252	0.246035	11.0588	1.40212
CACNB2-Hs00167861_m1	Target	40	0	40	0	37.357	3.66016	40	0	32.008	0.676955	40	0	19.3321	0.821912	19.9085	0.195795	15.0919	3.62108	20.3097	0.451326	11.2089	0.480718	20.0705	0.0991437
CACNB3-Hs00167873_m1	Target	26.5291	0.147114	26.8501	0.315415	28.7433	1.1187	28.2198	0.516921	27.9696	0.550947	25.7287	0.117413	5.86122	0.76927	6.7586	0.391096	6.47816	0.344324	8.52947	0.196508	7.1705	0.357811	5.79913	0.193938
CACNB4-Hs00947799_m1	Target	32.1265	0.360732	31.105	1.13223	28.8768	0.713663	29.2869	0.430319	24.3483	0.302746	26.3895	0.343887	11.4587	0.818802	11.0135	1.25524	6.61168	0.602104	9.59663	0.283958	3.5491	0.0904864	6.46003	0.401933
CACNG1-Hs00167887_m1	Target	40	0	40	0	40	0	40	0	40	0	40	0	19.3321	0.821912	19.9085	0.195795	17.7348	1.02363	20.3097	0.451326	19.2009	0.219079	20.0705	0.0991437
CACNG2-Hs00196045_m1	Target	40	0	40	0	40	0	40	0	40	0	40	0	19.3321	0.821912	19.9085	0.195795	17.7348	1.02363	20.3097	0.451326	19.2009	0.219079	20.0705	0.0991437
CACNG3-Hs00197985_m1	Target	40	0	40	0	40	0	40	0	40	0	40	0	19.3321	0.821912	19.9085	0.195795	17.7348	1.02363	20.3097	0.451326	19.2009	0.219079	20.0705	0.0991437
CACNG4-Hs01061935_m1	Target	34.8891	4.81168	39.0353	2.15709	40	0	40	0	32.3933	0.450807	40	0	14.2213	5.21339	18.9438	2.11835	17.7348	1.02363	20.3097	0.451326	11.5941	0.251204	20.0705	0.0991437
CACNG5-Hs00274241_m1	Target	39.3693	1.41038	39.5588	0.986553	40	0	40	0	29.8977	0.116801	40	0	18.7014	1.56721	19.4673	0.963563	17.7348	1.02363	20.3097	0.451326	9.09853	0.182124	20.0705	0.0991437
CACNG6-Hs01102159_m1	Target	34.7498	3.95074	40	0	34.9963	4.59491	39.9365	0.109927	38.7649	2.13926	36.7417	5.64348	14.082	3.46014	19.9085	0.195795	12.7311	3.77324	20.2462	0.482929	17.9657	1.92903	16.8122	5.68419
CACNG7-Hs00259061_m1	Target	38.4637	2.52892	39.8516	0.331877	39.5576	0.989281	40	0	38.1963	3.12404	40	0	17.7958	2.65305	19.7601	0.342191	17.2924	1.48531	20.3097	0.451326	17.3972	3.28381	20.0705	0.0991437
CACNG8-Hs01100182_m1	Target	37.431	3.53551	34.5989	3.25734	37.4252	3.52778	39.7784	0.38388	40	0	38.3949	2.22623	16.7632	3.4274	14.5074	3.25679	15.1601	4.02787	20.0881	0.784817	19.2009	0.219079	18.4654	2.13057
CATSPER1-Hs00364950_m1	Target	25.9072	0.59619	26.0724	0.534485	25.5359	0.425853	26.8591	0.764019	24.7026	0.269127	27.4803	0.380568	5.23936	0.868929	5.98094	0.56362	3.27074	0.782264	7.16883	0.345594	3.9034	0.06692	7.5508	0.429254
CATSPER2-Hs00542505_m1	Target	32.0817	0.597356	32.0986	0.454338	33.2466	1.30013	30.0147	0.31509	30.4617	0.545444	28.9323	0.341142	11.4139	0.401328	12.0071	0.530283	10.9814	0.732736	10.3244	0.502138	9.66257	0.4812	9.0028	0.25934
CATSPER3-Hs00604374_m1	Target	30.3345	0.783677	29.4562	0.563222	31.1349	1.44173	28.5066	0.321304	28.1362	0.339372	28.4119	0.338503	9.6666	0.463915	9.36474	0.61618	8.8697	0.53793	8.8163	0.152236	7.33707	0.223047	8.48237	0.401297
CATSPER4-Hs01374398_m1	Target	40	0	40	0	40	0	40	0	40	0	40	0	19.3321	0.821912	19.9085	0.195795	17.7348	1.02363	20.3097	0.451326	19.2009	0.219079	20.0705	0.0991437
CFTR-Hs00357011_m1	Target	35.6724	3.01445	38.0603	2.65637	40	0	40	0	40	0	40	0	15.0045	3.42538	17.9688	2.79877	17.7348	1.02363	20.3097	0.451326	19.2009	0.219079	20.0705	0.0991437
CHRNA1-Hs00175578_m1	Target	32.8685	1.13151	32.592	0.982085	40	0	40	0	40	0	38.1062	3.28016	12.2006	0.518492	12.5005	1.11001	17.7348	1.02363	20.3097	0.451326	19.2009	0.219079	18.1767	3.33974
CHRNA10-Hs00220710_m1	Target	32.3018	1.06019	33.8308	3.46673	35.5886	4.09544	31.3221	0.149805	32.2438	0.47357	31.8831	1.30981	11.6339	1.28782	13.7394	3.50004	13.3234	3.31578	11.6318	0.334539	11.4446	0.297812	11.9536	1.25849
CHRNA2-Hs00181237_m1	Target	40	0	40	0	38.7693	2.75184	39.6911	0.535088	40	0	40	0	19.3321	0.821912	19.9085	0.195795	16.5042	2.48567	20.0008	0.927008	19.2009	0.219079	20.0705	0.0991437
CHRNA3-Hs00609519_m1	Target	31.3003	2.10761	32.7435	1.42124	40	0	40	0	33.4709	1.0019	35.9876	3.47487	10.6324	2.0621	12.652	1.29429	17.7348	1.02363	20.3097	0.451326	12.6718	0.993688	16.0581	3.43666
CHRNA4-Hs00181247_m1	Target	40	0	40	0	40	0	40	0	40	0	40	0	19.3321	0.821912	19.9085	0.195795	17.7348	1.02363	20.3097	0.451326	19.2009	0.219079	20.0705	0.0991437
CHRNA5-Hs00181248_m1	Target	29.7223	1.41834	29.6051	0.70587	32.197	1.15327	28.5706	0.842932	29.147	0.316779	25.1154	0.14437	9.05444	1.01392	9.51368	0.74993	9.93186	1.15148	8.88033	1.17391	8.3478	0.489128	5.18593	0.150165
CHRNA6-Hs00610231_m1	Target	34.7965	2.98888	29.6423	1.81805	40	0	37.5117	2.62814	31.4615	0.385326	36.694	2.94724	14.1286	2.16982	9.5508	1.93003	17.7348	1.02363	17.8215	2.33067	10.6624	0.464029	16.7645	2.87204
CHRNA7-Hs00608028_m1	Target	27.2337	0.740512	26.447	0.362938	27.2165	0.742854	32.9776	0.719023	31.1217	0.191898	26.3391	0.153791	6.56584	0.650088	6.35554	0.271357	4.95138	0.329929	13.2873	1.17024	10.3226	0.393006	6.4096	0.115438
CHRNA9-Hs00395558_m1	Target	39.1802	1.83322	40	0	40	0	40	0	40	0	37.0951	2.55951	18.5123	1.72702	19.9085	0.195795	17.7348	1.02363	20.3097	0.451326	19.2009	0.219079	17.1656	2.53882
CHRNB1-Hs00181255_m1	Target	26.4577	0.455025	26.7175	0.175263	27.4735	0.882853	27.0567	0.461273	28.9035	0.412476	26.1656	0.320186	5.7898	0.423059	6.62604	0.301727	5.20832	0.251892	7.3664	0.152848	8.1044	0.241074	6.23613	0.399083
CHRNB2-Hs00181267_m1	Target	40	0	40	0	38.9631	2.31849	37.4772	2.55556	35.1584	4.20505	33.8679	0.641141	19.3321	0.821912	19.9085	0.195795	16.698	2.1694	17.7869	2.44902	14.3592	4.04022	13.9384	0.734614
CHRNB3-Hs00181269_m1	Target	40	0	40	0	40	0	40	0	40	0	38.4433	2.69628	19.3321	0.821912	19.9085	0.195795	17.7348	1.02363	20.3097	0.451326	19.2009	0.219079	18.5138	2.75607
CHRNB4-Hs00609523_m1	Target	38.6479	3.02339	36.9435	3.44585	39.6696	0.738886	38.8246	2.03579	40	0	35.6015	3.81496	17.98	3.06094	16.8521	3.55871	17.4044	1.73383	19.1343	2.16128	19.2009	0.219079	15.672	3.77114
CHRND-Hs00181284_m1	Target	40	0	34.0346	3.46267	40	0	39.4435	0.963829	40	0	40	0	19.3321	0.821912	13.9431	3.57163	17.7348	1.02363	19.7532	1.34086	19.2009	0.219079	20.0705	0.0991437
CHRNE-Hs00972485_m1	Target	28.4308	1.05117	27.474	0.366022	30.7247	1.47108	29.1153	0.405525	29.9127	0.736177	28.9422	0.977333	7.76294	0.841338	7.3825	0.448292	8.4595	0.569975	9.42497	0.0992154	9.11353	0.589262	9.01267	0.982962
CHRNG-Hs00183228_m1	Target	40	0	34.3715	5.16061	40	0	40	0	40	0	39.8892	0.191853	19.3321	0.821912	14.28	5.23158	17.7348	1.02363	20.3097	0.451326	19.2009	0.219079	19.9597	0.262933
CLCA1-Hs00976287_m1	Target	40	0	40	0	40	0	36.2063	6.57094	40	0	40	0	19.3321	0.821912	19.9085	0.195795	17.7348	1.02363	16.516	6.92216	19.2009	0.219079	20.0705	0.0991437
CLCA2-Hs00197957_m1	Target	39.4514	1.22662	40	0	40	0	38.0827	3.3208	35.4631	0.3424	40	0	18.7836	1.41377	19.9085	0.195795	17.7348	1.02363	18.3924	2.90043	14.664	0.347779	20.0705	0.0991437
CLCA4-Hs00201697_m1	Target	40	0	40	0	40	0	40	0	40	0	40	0	19.3321	0.821912	19.9085	0.195795	17.7348	1.02363	20.3097	0.451326	19.2009	0.219079	20.0705	0.0991437
CLCN1-Hs00163961_m1	Target	40	0	38.9815	2.27752	37.4423	3.50366	38.0516	3.37473	37.5645	4.21835	39.1355	1.44922	19.3321	0.821912	18.89	2.23832	15.1771	2.94577	18.3613	2.95428	16.7654	4.37717	19.206	1.35095
CLCN2-Hs00189078_m1	Target	28.1171	0.454147	27.9838	0.533451	29.4625	0.945891	27.0193	0.537059	25.7327	0.301764	24.6716	0.243766	7.44928	1.05406	7.89226	0.663219	7.19734	0.299078	7.32897	0.504049	4.9336	0.0836039	4.74217	0.170741
CLCN3-Hs00923164_m1	Target	24.1363	0.778876	23.442	0.295906	25.8033	1.44196	22.915	0.604251	23.8828	0.282892	24.6599	0.459609	3.46848	0.186187	3.35054	0.218855	3.53814	0.439309	3.22473	0.178171	3.08367	0.0648411	4.73043	0.4382
CLCN4-Hs00156541_m1	Target	24.0324	0.611226	29.6328	1.14834	29.0035	0.69803	28.3352	0.162068	26.071	0.253563	37.3346	4.61667	3.36458	1.3214	9.54132	0.988432	6.73836	0.85854	8.64487	0.526935	5.27187	0.152461	17.4051	4.51813
CLCN5-Hs00163986_m1	Target	25.398	0.577725	25.4215	0.308239	27.0641	1.47019	26.0268	0.231674	26.1215	0.452426	24.5275	0.180248	4.73014	0.409141	5.33	0.263559	4.79898	0.474933	6.3365	0.379063	5.32237	0.233577	4.598	0.0830287
CLCN6-Hs00154518_m1	Target	23.6818	0.547547	24.0073	0.437872	24.0399	0.414782	23.9675	0.412972	23.0936	0.2542	23.2787	0.0574033	3.01396	0.424967	3.91588	0.509315	1.77474	0.647782	4.27723	0.0535743	2.2945	0.147633	3.34923	0.091139
CLCN7-Hs01126470_g1	Target	22.2307	0.207036	21.7228	0.220437	23.2947	0.69517	21.3868	0.331645	22.0061	0.288182	21.4099	0.118675	1.56282	0.801443	1.63132	0.321203	1.02956	0.436711	1.69653	0.121254	1.20697	0.102381	1.4804	0.217793
CLCNKA-Hs00427895_g1	Target	31.9941	0.84033	30.11	0.674352	38.5489	3.24485	29.5962	0.368451	27.4855	0.365837	40	0	11.3262	0.37899	10.0186	0.754948	16.2837	2.94915	9.9059	0.590149	6.68637	0.146934	20.0705	0.0991437
CLCNKB-Hs00426158_g1	Target	40	0	40	0	40	0	37.7273	3.93643	40	0	40	0	19.3321	0.821912	19.9085	0.195795	17.7348	1.02363	18.037	4.29135	19.2009	0.219079	20.0705	0.0991437
CLIC1-Hs01007016_g1	Target	20.3703	0.569664	20.6084	0.226345	21.4863	1.00698	20.2658	0.353445	20.493	0.328613	19.3743	0.0838833	-0.29752	0.446454	0.51694	0.192797	-0.77886	0.0965644	0.575467	0.289305	-0.306167	0.109702	-0.555167	0.0642449
CLIC2-Hs01574555_m1	Target	23.8328	1.01325	24.1629	0.402591	27.3601	1.52697	30.5663	0.280929	28.5387	0.219114	27.3883	0.419639	3.16492	0.246013	4.07144	0.442297	5.09498	0.582645	10.876	0.431244	7.7396	0.194448	7.45883	0.493962
CLIC3-Hs00362166_g1	Target	26.6065	0.969887	28.7264	0.682267	32.5039	1.43039	29.5489	0.33867	30.5657	0.346606	32.0572	0.812195	5.93868	1.39934	8.6349	0.556214	10.2388	1.57363	9.85857	0.67973	9.76647	0.527934	12.1277	0.822706
CLIC4-Hs00749895_s1	Target	22.5694	1.22648	22.3479	0.270476	26.5311	1.61473	23.5922	0.26895	23.8046	0.484526	23.1823	0.317707	1.90156	0.513459	2.25646	0.135024	4.2659	0.667186	3.9019	0.502235	3.00543	0.3097	3.25277	0.416488
CLIC5-Hs01021245_m1	Target	27.8931	1.26333	34.2461	3.36169	37.6989	3.16721	32.0275	0.0936351	27.123	0.340167	40	0	7.22526	0.853169	14.1547	3.44779	15.4337	3.68166	12.3373	0.361607	6.32387	0.136059	20.0705	0.0991437
CLIC6-Hs00401339_m1	Target	27.1981	1.06247	25.5495	0.636543	40	0	37.309	4.66089	25.2526	0.135136	40	0	6.53022	1.13911	5.45798	0.562029	17.7348	1.02363	17.6187	5.01444	4.4535	0.0919348	20.0705	0.0991437
CNGA1-Hs00175586_m1	Target	36.8133	4.36397	31.6485	1.48648	38.81	2.66088	33.3169	1.38557	34.0809	1.06983	38.0831	3.32023	16.1455	4.23034	11.557	1.47098	16.5448	3.63516	13.6266	1.59826	13.2817	0.854123	18.1536	3.36137
CNGA2-Hs01377537_m1	Target	40	0	39.0275	2.17458	39.323	1.51391	40	0	40	0	38.0815	1.87447	19.3321	0.821912	18.936	2.14094	17.0578	2.49672	20.3097	0.451326	19.2009	0.219079	18.152	1.96716
CNGA3-Hs00899443_m1	Target	40	0	40	0	40	0	40	0	40	0	39.2029	1.38062	19.3321	0.821912	19.9085	0.195795	17.7348	1.02363	20.3097	0.451326	19.2009	0.219079	19.2734	1.42344
CNGA4-Hs01584129_m1	Target	32.7735	1.11586	36.6966	2.07114	34.3759	3.25974	32.6349	0.951168	31.6466	0.388433	32.6748	0.266873	12.1056	1.23224	16.6051	1.95092	12.1107	2.28256	12.9446	0.523215	10.8474	0.171522	12.7453	0.356092
CNGB1-Hs00757900_m1	Target	38.9854	2.26863	40	0	38.6081	3.11243	37.5447	4.2527	36.4155	3.108	40	0	18.3176	2.34242	19.9085	0.195795	16.3429	2.90348	17.8544	3.83134	15.6164	2.94812	20.0705	0.0991437
CNGB3-Hs00175860_m1	Target	40	0	40	0	40	0	40	0	36.8832	2.72068	40	0	19.3321	0.821912	19.9085	0.195795	17.7348	1.02363	20.3097	0.451326	16.0841	2.64732	20.0705	0.0991437
FXYD1-Hs00245327_m1	Target	30.7974	1.54817	26.1616	0.380354	30.3203	0.538317	27.255	0.293395	28.8934	0.356998	25.9464	0.517766	10.1296	1.61302	6.0701	0.407511	8.05512	0.504142	7.56473	0.441305	8.09427	0.229215	6.01693	0.564164
FXYD3-Hs00254211_m1	Target	29.5376	2.2589	31.2747	1.08029	38.7623	2.76763	40	0	36.6196	2.93649	40	0	8.8698	1.74464	11.1833	1.22325	16.4971	2.50034	20.3097	0.451326	15.8205	2.77243	20.0705	0.0991437
FXYD4-Hs00544991_m1	Target	38.9992	2.23795	38.9222	2.41003	37.0255	2.71601	40	0	38.4215	2.7341	34.6927	9.19246	18.3313	2.12222	18.8307	2.37038	14.7603	3.0282	20.3097	0.451326	17.6223	2.52367	14.7632	9.23288
FXYD5-Hs00204319_m1	Target	21.3309	0.74603	20.0992	0.242678	20.7222	0.787151	21.0004	0.530961	21.2457	0.23672	19.868	0.121791	0.66308	0.360946	0.0077	0.15097	-1.54298	0.400365	1.31013	0.105821	0.4466	0.0279823	-0.0615	0.220862
FXYD6-Hs01121135_m1	Target	30.4474	1.49595	30.1179	0.343642	29.0736	1.16291	39.974	0.0449756	31.9895	0.303463	28.4632	0.411805	9.7796	1.41394	10.0264	0.470754	6.80842	1.48436	20.2837	0.461361	11.1904	0.130658	8.53373	0.507988
FXYD7-Hs00758177_m1	Target	32.437	1.20183	34.3967	2.67473	38.1166	2.16874	37.6584	3.21869	37.9937	2.37548	34.7503	0.216169	11.7691	1.91196	14.3053	2.48232	15.8514	2.08827	17.9682	3.53024	17.1946	2.37621	14.8208	0.18576
GABRA1-Hs00168058_m1	Target	40	0	40	0	40	0	40	0	32.9873	0.628839	40	0	19.3321	0.821912	19.9085	0.195795	17.7348	1.02363	20.3097	0.451326	12.1881	0.763159	20.0705	0.0991437
GABRA2-Hs00168069_m1	Target	40	0	40	0	40	0	40	0	33.7583	1.54386	38.9058	1.89527	19.3321	0.821912	19.9085	0.195795	17.7348	1.02363	20.3097	0.451326	12.9592	1.51795	18.9762	1.93738
GABRA3-Hs00968132_m1	Target	40	0	40	0	40	0	36.1858	6.60633	37.1692	3.75496	40	0	19.3321	0.821912	19.9085	0.195795	17.7348	1.02363	16.4955	6.95752	16.3701	3.77576	20.0705	0.0991437
GABRA4-Hs00608034_m1	Target	31.5539	1.57579	31.3309	1.55747	38.7674	2.75622	24.5958	0.300021	26.8397	0.212975	40	0	10.8861	1.54073	11.2394	1.64607	16.5022	2.71332	4.90553	0.234003	6.04053	0.0908138	20.0705	0.0991437
GABRA5-Hs00181291_m1	Target	40	0	40	0	40	0	40	0	40	0	40	0	19.3321	0.821912	19.9085	0.195795	17.7348	1.02363	20.3097	0.451326	19.2009	0.219079	20.0705	0.0991437
GABRA6-Hs00181301_m1	Target	40	0	40	0	40	0	37.7172	3.42553	40	0	40	0	19.3321	0.821912	19.9085	0.195795	17.7348	1.02363	18.0269	3.8045	19.2009	0.219079	20.0705	0.0991437
GABRB1-Hs00181306_m1	Target	40	0	40	0	40	0	37.5953	4.16512	31.9956	0.503202	40	0	19.3321	0.821912	19.9085	0.195795	17.7348	1.02363	17.905	3.74383	11.1965	0.703694	20.0705	0.0991437
GABRB2-Hs00241451_m1	Target	38.9222	2.41012	37.2986	3.7268	40	0	33.2168	1.68181	30.2358	0.333678	40	0	18.2543	2.47549	17.2071	3.63235	17.7348	1.02363	13.5265	1.64341	9.43663	0.321243	20.0705	0.0991437
GABRB3-Hs00326767_s1	Target	36.3531	5.02443	36.5021	3.29865	36.4645	5.04878	35.4139	5.96533	40	0	40	0	15.6852	5.70328	16.4106	3.18175	14.1993	4.69267	15.7236	6.14771	19.2009	0.219079	20.0705	0.0991437
GABRD-Hs00181309_m1	Target	40	0	40	0	40	0	38.1752	3.1607	30.3761	0.136752	40	0	19.3321	0.821912	19.9085	0.195795	17.7348	1.02363	18.4849	3.51786	9.57697	0.146666	20.0705	0.0991437
GABRE-Hs00608332_m1	Target	37.8656	2.92298	40	0	40	0	40	0	40	0	40	0	17.1977	2.82592	19.9085	0.195795	17.7348	1.02363	20.3097	0.451326	19.2009	0.219079	20.0705	0.0991437
GABRG1-Hs00381554_m1	Target	40	0	40	0	40	0	38.1529	3.19921	40	0	40	0	19.3321	0.821912	19.9085	0.195795	17.7348	1.02363	18.4626	3.55624	19.2009	0.219079	20.0705	0.0991437
GABRG2-Hs00168093_m1	Target	40	0	40	0	40	0	32.2429	0.157517	26.7152	0.385287	40	0	19.3321	0.821912	19.9085	0.195795	17.7348	1.02363	12.5526	0.57909	5.916	0.195389	20.0705	0.0991437
GABRG3-Hs00264276_m1	Target	40	0	40	0	40	0	40	0	40	0	40	0	19.3321	0.821912	19.9085	0.195795	17.7348	1.02363	20.3097	0.451326	19.2009	0.219079	20.0705	0.0991437
GABRP-Hs00204411_m1	Target	32.6505	2.40354	38.8048	2.67246	40	0	40	0	40	0	40	0	11.9827	2.4645	18.7134	2.59541	17.7348	1.02363	20.3097	0.451326	19.2009	0.219079	20.0705	0.0991437
GABRQ-Hs00610921_m1	Target	40	0	40	0	40	0	40	0	40	0	40	0	19.3321	0.821912	19.9085	0.195795	17.7348	1.02363	20.3097	0.451326	19.2009	0.219079	20.0705	0.0991437
GABRR1-Hs00266687_m1	Target	40	0	40	0	40	0	37.749	3.89885	40	0	40	0	19.3321	0.821912	19.9085	0.195795	17.7348	1.02363	18.0587	3.47779	19.2009	0.219079	20.0705	0.0991437
GABRR2-Hs00266703_m1	Target	28.3693	0.178943	27.6996	0.425857	28.6622	0.489749	27.6807	0.48351	24.6443	0.345821	27.6138	0.312757	7.7014	0.750744	7.60814	0.310056	6.397	0.711774	7.99037	0.219777	3.84517	0.209828	7.68427	0.354358
GABRR3-Hs02384557_m1	Target	40	0	40	0	40	0	40	0	40	0	40	0	19.3321	0.821912	19.9085	0.195795	17.7348	1.02363	20.3097	0.451326	19.2009	0.219079	20.0705	0.0991437
GAPDH-Hs99999905_m1	Selected Control	20.2833	1.0465	19.1431	0.538358	20.5857	1.10327	17.7531	0.612913	20.7622	0.17834	18.6909	0.242492	-0.38458	0.489539	-0.94836	0.44039	-1.67942	0.214016	-1.93713	0.179912	-0.0369333	0.142468	-1.2386	0.169833
GLRA1-Hs00609267_m1	Target	40	0	39.8622	0.30822	40	0	38.9247	1.86247	40	0	39.6499	0.606333	19.3321	0.821912	19.7707	0.501331	17.7348	1.02363	19.2344	2.22666	19.2009	0.219079	19.7204	0.652598
GLRA2-Hs00157710_m1	Target	40	0	40	0	40	0	38.9711	1.78216	40	0	40	0	19.3321	0.821912	19.9085	0.195795	17.7348	1.02363	19.2808	2.14707	19.2009	0.219079	20.0705	0.0991437
GLRA3-Hs00197920_m1	Target	40	0	40	0	40	0	40	0	40	0	40	0	19.3321	0.821912	19.9085	0.195795	17.7348	1.02363	20.3097	0.451326	19.2009	0.219079	20.0705	0.0991437
GLRA4-Hs01595852_m1	Target	40	0	40	0	40	0	40	0	37.1049	2.57855	38.8591	1.97615	19.3321	0.821912	19.9085	0.195795	17.7348	1.02363	20.3097	0.451326	16.3057	2.58386	18.9295	2.01818
GLRB-Hs00168151_m1	Target	37.6724	3.18994	33.8228	1.31423	40	0	38.0955	3.29863	28.5381	0.289898	40	0	17.0046	3.08725	13.7313	1.21419	17.7348	1.02363	18.4053	3.65528	7.7389	0.0827181	20.0705	0.0991437
GRIA1-Hs00181348_m1	Target	40	0	40	0	40	0	40	0	33.4979	0.566319	40	0	19.3321	0.821912	19.9085	0.195795	17.7348	1.02363	20.3097	0.451326	12.6988	0.484589	20.0705	0.0991437
GRIA2-Hs00181331_m1	Target	40	0	40	0	40	0	40	0	40	0	40	0	19.3321	0.821912	19.9085	0.195795	17.7348	1.02363	20.3097	0.451326	19.2009	0.219079	20.0705	0.0991437
GRIA3-Hs01557466_m1	Target	40	0	40	0	40	0	40	0	29.3367	0.517883	40	0	19.3321	0.821912	19.9085	0.195795	17.7348	1.02363	20.3097	0.451326	8.53757	0.384825	20.0705	0.0991437
GRIA4-Hs00898778_m1	Target	40	0	40	0	40	0	37.3984	4.50616	31.368	0.64681	38.8395	2.0101	19.3321	0.821912	19.9085	0.195795	17.7348	1.02363	17.7081	4.85998	10.5689	0.502206	18.91	2.07028
GRIA4-Hs00898779_m1	Target	40	0	40	0	40	0	40	0	33.1239	0.65441	40	0	19.3321	0.821912	19.9085	0.195795	17.7348	1.02363	20.3097	0.451326	12.3248	0.490786	20.0705	0.0991437
GRID1-Hs00324946_m1	Target	38.6616	2.99266	29.2036	4.74313	37.6666	3.20305	27.1286	0.356941	34.2394	1.69724	40	0	17.9938	2.9214	9.11214	4.72906	15.4014	3.10125	7.43837	0.298683	13.4403	1.56088	20.0705	0.0991437
GRID2-Hs00155295_m1	Target	38.7415	2.81409	35.8783	6.30072	40	0	40	0	40	0	40	0	18.0736	3.62541	15.7868	6.34705	17.7348	1.02363	20.3097	0.451326	19.2009	0.219079	20.0705	0.0991437
GRIK1-Hs00168165_m1	Target	40	0	40	0	40	0	39.221	1.34933	40	0	40	0	19.3321	0.821912	19.9085	0.195795	17.7348	1.02363	19.5307	1.71922	19.2009	0.219079	20.0705	0.0991437
GRIK1-Hs01081331_m1	Target	40	0	40	0	40	0	38.1985	3.12029	40	0	40	0	19.3321	0.821912	19.9085	0.195795	17.7348	1.02363	18.5082	3.47758	19.2009	0.219079	20.0705	0.0991437
GRIK2-Hs00222637_m1	Target	37.9862	2.76706	39.1563	1.88648	40	0	35.4404	4.35309	26.7266	0.117393	39.5429	0.79172	17.3183	2.48649	19.0649	1.81206	17.7348	1.02363	15.7501	4.80285	5.92743	0.126754	19.6134	0.836581
GRIK2-Hs00974858_m1	Target	40	0	40	0	40	0	37.8556	3.71427	40	0	40	0	19.3321	0.821912	19.9085	0.195795	17.7348	1.02363	18.1653	4.06978	19.2009	0.219079	20.0705	0.0991437
GRIK3-Hs00168182_m1	Target	40	0	40	0	40	0	40	0	40	0	25.2314	0.140819	19.3321	0.821912	19.9085	0.195795	17.7348	1.02363	20.3097	0.451326	19.2009	0.219079	5.30187	0.0988712
GRIK4-Hs00205979_m1	Target	34.1257	0.631049	33.9185	3.48057	37.6432	3.22713	35.5602	3.847	40	0	40	0	13.4578	0.389505	13.8271	3.30077	15.3781	3.09912	15.8699	4.27843	19.2009	0.219079	20.0705	0.0991437
GRIK5-Hs00958067_m1	Target	34.5852	3.28253	35.8197	4.03131	29.8461	0.751949	30.8372	0.509459	31.2483	0.344344	30.3791	0.151595	13.9173	2.56615	15.7282	4.17211	7.58098	1.20541	11.1469	0.489124	10.4491	0.468184	10.4496	0.168849
GRIN1-Hs00246956_m1	Target	34.2044	1.80036	37.6929	3.18075	38.9689	2.30561	40	0	32.725	0.399394	40	0	13.5365	2.07954	17.6014	3.11389	16.7037	2.15788	20.3097	0.451326	11.9259	0.262086	20.0705	0.0991437
GRIN1-Hs00609557_m1	Target	40	0	40	0	40	0	38.5968	2.43047	38.2859	2.96891	34.7157	0.44495	19.3321	0.821912	19.9085	0.195795	17.7348	1.02363	18.9065	2.79078	17.4867	2.75842	14.7862	0.40862
GRIN2A-Hs01058345_m1	Target	31.5877	1.89172	35.0214	3.17379	39.1609	1.87624	38.5106	2.57977	38.7624	2.14359	38.1095	3.27444	10.9198	2.15454	14.9299	3.02838	16.8958	1.92222	18.8203	2.93931	17.9633	2.20878	18.18	3.31567
GRIN2B-Hs00168230_m1	Target	40	0	40	0	40	0	37.9332	3.57974	35.8515	3.59416	40	0	19.3321	0.821912	19.9085	0.195795	17.7348	1.02363	18.243	3.93556	15.0524	3.55165	20.0705	0.0991437
GRIN2C-Hs01016626_m1	Target	40	0	40	0	40	0	35.6348	4.1866	40	0	30.0494	0.610823	19.3321	0.821912	19.9085	0.195795	17.7348	1.02363	15.9446	4.32778	19.2009	0.219079	10.1199	0.690389
GRIN2D-Hs00181352_m1	Target	26.0149	0.677029	26.6834	0.400952	28.775	0.920032	28.4714	0.410571	23.324	0.393873	24.9986	0.203368	5.34702	0.599823	6.59192	0.453287	6.50982	0.272114	8.78107	0.0411534	2.52477	0.187837	5.0691	0.104781
GRIN3A-Hs00370290_m1	Target	40	0	40	0	40	0	39.2152	1.35937	32.2642	0.572164	40	0	19.3321	0.821912	19.9085	0.195795	17.7348	1.02363	19.5249	1.72912	11.4651	0.379453	20.0705	0.0991437
GRIN3B-Hs00879908_m1	Target	32.1748	1.75061	29.2671	1.01882	32.8711	1.19206	33.6854	0.555068	27.8122	0.0543951	38.1591	3.18859	11.507	1.89246	9.17556	1.1688	10.6059	0.957446	13.9951	0.887795	7.01303	0.165493	18.2296	3.09006
GUSB-Hs99999908_m1	Selected Control	22.1824	0.547532	21.2645	0.441325	23.8178	0.823132	21.4033	0.423265	21.834	0.322756	21.3559	0.0280079	1.51456	0.447875	1.17302	0.303332	1.55262	0.217013	1.71307	0.0377301	1.0349	0.104962	1.4264	0.121073
HCN1-Hs00395037_m1	Target	38.8618	2.54509	40	0	40	0	40	0	37.211	3.21349	40	0	18.1939	2.49401	19.9085	0.195795	17.7348	1.02363	20.3097	0.451326	16.4118	3.31775	20.0705	0.0991437
HCN2-Hs00606903_m1	Target	30.973	1.24845	28.6098	0.72098	33.5325	3.69402	28.7424	0.834762	25.2598	0.261195	33.353	0.949801	10.3052	1.39019	8.51828	0.763522	11.2674	2.68972	9.05213	0.39467	4.4606	0.0583555	13.4235	0.89941
HCN3-Hs01094393_g1	Target	28.9565	0.345948	28.9024	0.339467	30.7349	0.893926	29.7749	0.31563	29.0483	0.226935	26.0069	0.559918	8.28868	0.783174	8.81094	0.384915	8.46974	0.441339	10.0846	0.266065	8.24917	0.352551	6.07733	0.634116
HCN4-Hs00975492_m1	Target	36.4439	3.24801	40	0	40	0	40	0	35.6872	3.73703	40	0	15.776	2.88443	19.9085	0.195795	17.7348	1.02363	20.3097	0.451326	14.8881	3.9467	20.0705	0.0991437
HPRT1-Hs99999909_m1	Selected Control	24.4544	0.761466	23.7511	0.351808	25.3951	1.25432	22.9989	0.521279	24.2588	0.24466	21.4464	0.12145	3.78656	0.144368	3.6596	0.393878	3.12998	0.284528	3.3086	0.071279	3.45967	0.0484233	1.5169	0.0440065
HTR3A-Hs00168375_m1	Target	34.8092	3.0503	40	0	34.0921	1.00904	38.0346	3.40423	40	0	40	0	14.1413	3.51261	19.9085	0.195795	11.827	1.5384	18.3443	2.98374	19.2009	0.219079	20.0705	0.0991437
HTR3B-Hs00175775_m1	Target	40	0	40	0	40	0	40	0	40	0	40	0	19.3321	0.821912	19.9085	0.195795	17.7348	1.02363	20.3097	0.451326	19.2009	0.219079	20.0705	0.0991437
HTR3C-Hs00365674_m1	Target	40	0	40	0	40	0	40	0	40	0	39.7636	0.409515	19.3321	0.821912	19.9085	0.195795	17.7348	1.02363	20.3097	0.451326	19.2009	0.219079	19.8341	0.474922
HTR3D-Hs00699391_m1	Target	40	0	40	0	40	0	40	0	40	0	40	0	19.3321	0.821912	19.9085	0.195795	17.7348	1.02363	20.3097	0.451326	19.2009	0.219079	20.0705	0.0991437
HTR3E-Hs00704511_s1	Target	36.1274	3.99387	36.5989	3.13791	35.6797	4.16325	33.1421	6.13804	36.4146	3.12078	36.682	2.89148	15.4595	4.61006	16.5074	3.02301	13.4145	3.8126	13.4518	6.51499	15.6154	3.09488	16.7525	2.82525
HVCN1-Hs00260697_m1	Target	23.6399	0.727819	22.6665	0.354969	23.762	0.831307	23.5738	0.336511	24.2037	0.458305	34.9671	0.907428	2.97198	0.38505	2.57502	0.2535	1.49682	0.240589	3.8835	0.116141	3.40453	0.25505	15.0376	0.96908
ITPR1-Hs00976063_m1	Target	23.8073	0.759973	24.0638	0.196214	26.0506	0.882696	21.4097	0.591715	25.2054	0.323739	23.2606	0.35922	3.13944	0.561218	3.9723	0.317442	3.78548	0.283543	1.71943	0.140436	4.40627	0.313936	3.3311	0.26057
ITPR2-Hs00181916_m1	Target	22.5646	0.757866	23.0326	0.336888	24.5481	1.08575	23.3709	0.39908	24.0202	0.154854	24.2697	0.13562	1.89676	0.283997	2.94116	0.488703	2.28296	0.273707	3.68057	0.10035	3.22103	0.314929	4.3402	0.0712495
ITPR3-Hs01573555_m1	Target	25.9631	0.361564	29.2169	1.3528	29.9303	1.73843	31.3924	0.22182	26.7936	0.348187	23.5166	0.186084	5.2953	0.620032	9.12542	1.41015	7.66512	0.856149	11.7022	0.629871	5.9945	0.140509	3.58703	0.0923804
KCNA1-Hs00264798_s1	Target	37.4874	3.47739	33.8657	0.897019	38.2537	3.9048	36.5762	5.9302	37.6342	4.09763	40	0	16.8196	3.29766	13.7742	1.00553	15.9885	3.80505	16.8859	6.02593	16.8351	3.88696	20.0705	0.0991437
KCNA10-Hs00271484_s1	Target	26.302	0.359716	24.6097	0.812101	37.9443	4.59673	23.8701	0.189342	32.525	0.588648	31.0903	0.161239	5.6341	1.02485	4.51816	0.763229	15.6791	4.47644	4.17987	0.28083	11.7258	0.552732	11.1608	0.0848576
KCNA2-Hs00270656_s1	Target	27.8657	0.448697	26.1994	0.620664	38.3228	3.75029	25.8367	0.554317	36.879	2.7067	40	0	7.19788	0.90291	6.10792	0.594984	16.0576	3.65615	6.1464	0.251801	16.0799	2.91529	20.0705	0.0991437
KCNA3-Hs00704943_s1	Target	24.3324	1.0303	27.8457	0.726108	26.6792	1.7423	27.3953	0.264523	29.5837	0.116095	26.1472	0.493326	3.6645	0.313758	7.75422	0.74114	4.4141	0.96599	7.70503	0.540905	8.7846	0.335051	6.21773	0.403434
KCNA4-Hs00357903_s1	Target	37.5313	3.38053	36.9264	2.80689	38.2574	3.89653	36.0671	5.51064	40	0	40	0	16.8635	4.01553	16.8349	2.69283	15.9922	3.79706	16.3768	5.66857	19.2009	0.219079	20.0705	0.0991437
KCNA5-Hs00266898_s1	Target	35.9045	3.74659	38.7749	2.73945	38.1803	4.06893	31.5536	2.40356	40	0	40	0	15.2366	4.2346	18.6834	2.69887	15.9152	3.96363	11.8633	2.57964	19.2009	0.219079	20.0705	0.0991437
KCNA6-Hs00266903_s1	Target	32.1752	1.44634	36.0395	3.61774	36.6622	4.65465	30.641	2.71893	40	0	29.0254	0.118496	11.5073	1.20992	15.948	3.678	14.3971	4.23093	10.9507	3.1259	19.2009	0.219079	9.0959	0.128805
KCNA7-Hs00361015_m1	Target	40	0	40	0	40	0	40	0	37.517	4.30062	40	0	19.3321	0.821912	19.9085	0.195795	17.7348	1.02363	20.3097	0.451326	16.7179	4.36083	20.0705	0.0991437
KCNAB1-Hs00963155_m1	Target	26.6466	2.46006	30.5575	1.34113	40	0	39.6035	0.686758	31.9111	1.38885	28.3185	0.0446391	5.97878	2.89332	10.466	1.45167	17.7348	1.02363	19.9132	1.07202	11.112	1.20309	8.389	0.0635116
KCNAB2-Hs00186308_m1	Target	21.6181	0.394968	20.379	0.286249	22.3057	0.58529	20.6363	0.48676	20.3309	0.408689	19.9185	0.0696845	0.95028	0.875144	0.2875	0.298054	0.04056	0.483835	0.946	0.0419136	-0.468233	0.190417	-0.0109667	0.163788
KCNAB3-Hs00190986_m1	Target	30.2043	0.198003	30.6345	0.194023	29.1815	0.578962	32.2019	0.60622	30.2927	0.423223	28.4893	0.18303	9.53644	0.789121	10.543	0.244975	6.91632	0.560845	12.5116	0.604176	9.49357	0.218176	8.55983	0.166366
KCNB1-Hs00270657_m1	Target	38.8984	2.46316	40	0	40	0	40	0	36.3346	3.17893	40	0	18.2306	2.41657	19.9085	0.195795	17.7348	1.02363	20.3097	0.451326	15.5355	3.03563	20.0705	0.0991437
KCNB2-Hs00191116_m1	Target	39.4865	1.14822	38.9602	2.32506	40	0	39.3634	1.10257	40	0	40	0	18.8186	1.25422	18.8687	2.29086	17.7348	1.02363	19.6731	0.695272	19.2009	0.219079	20.0705	0.0991437
KCNC1-Hs00428197_m1	Target	40	0	40	0	40	0	40	0	40	0	40	0	19.3321	0.821912	19.9085	0.195795	17.7348	1.02363	20.3097	0.451326	19.2009	0.219079	20.0705	0.0991437
KCNC2-Hs01066923_m1	Target	40	0	40	0	40	0	40	0	40	0	40	0	19.3321	0.821912	19.9085	0.195795	17.7348	1.02363	20.3097	0.451326	19.2009	0.219079	20.0705	0.0991437
KCNC3-Hs00192108_m1	Target	40	0	40	0	40	0	39.7389	0.452238	28.5305	0.745384	40	0	19.3321	0.821912	19.9085	0.195795	17.7348	1.02363	20.0486	0.155948	7.7314	0.58858	20.0705	0.0991437
KCNC4-Hs00428198_m1	Target	27.2575	0.643053	27.5991	0.447938	31.1228	1.96643	29.1022	0.36455	27.2467	0.211193	25.29	0.260526	6.5896	0.711465	7.50762	0.481397	8.85764	0.963859	9.41197	0.186649	6.44757	0.0202401	5.3605	0.163633
KCND1-Hs00192113_m1	Target	30.1573	0.923835	29.5491	0.382269	28.5739	1.14931	26.8923	0.483252	27.8849	0.232127	27.1301	0.435323	9.48946	0.359019	9.45766	0.527022	6.30874	0.499282	7.202	0.106291	7.08577	0.258108	7.2006	0.367663
KCND2-Hs01054876_m1	Target	40	0	40	0	40	0	36.9922	3.82934	31.5602	0.292071	32.1533	0.426872	19.3321	0.821912	19.9085	0.195795	17.7348	1.02363	17.3019	4.11685	10.7611	0.218072	12.2238	0.428188
KCND3-Hs00542597_m1	Target	36.4425	3.32609	38.0931	2.62281	35.557	2.50955	40	0	40	0	37.5607	4.22505	15.7746	2.99816	18.0016	2.76169	13.2918	1.60508	20.3097	0.451326	19.2009	0.219079	17.6311	4.28448
KCNE1-Hs00264799_s1	Target	25.5091	0.524926	26.5902	0.410027	28.2276	1.01279	26.228	0.40883	27.0067	0.421088	25.7825	0.237908	4.84126	1.02675	6.4987	0.443877	5.96244	0.445691	6.5377	0.111389	6.20753	0.213542	5.85307	0.226582
KCNE1L-Hs00273381_s1	Target	38.056	1.30394	40	0	38.9768	1.7875	34.7275	1.3743	31.1926	0.664728	31.4078	1.04801	17.3882	0.758471	19.9085	0.195795	16.7116	2.06181	15.0372	1.62358	10.3934	0.880779	11.4783	1.13864
KCNE2-Hs00270822_s1	Target	31.924	1.23488	31.3467	0.331331	32.0444	0.94107	29.3577	0.966494	30.6692	0.279783	28.7874	0.398024	11.2562	1.57138	11.2552	0.347447	9.77928	1.21048	9.6674	0.81271	9.8701	0.0646084	8.85793	0.299023
KCNE3-Hs00538801_m1	Target	23.7305	1.18206	23.4589	0.227931	23.0157	0.529782	24.2173	0.625829	25.6716	0.240979	24.3962	0.034577	3.06268	1.15883	3.3674	0.345815	0.75052	0.571105	4.52697	0.176037	4.87247	0.0504054	4.46667	0.0896644
KCNF1-Hs00266908_s1	Target	32.5191	1.9938	28.5202	0.76153	37.0844	4.20842	29.9358	0.917208	29.807	0.160311	40	0	11.8513	2.16198	8.42868	0.861826	14.8192	4.15802	10.2456	0.921901	9.0079	0.165592	20.0705	0.0991437
KCNG1-Hs00158410_m1	Target	32.5931	1.69309	30.6152	0.976234	38.9791	2.28289	33.8863	0.563783	26.5794	0.198856	30.6856	0.240781	11.9253	1.25134	10.5237	0.946286	16.7139	2.13749	14.1961	0.954223	5.78027	0.0980301	10.7561	0.292464
KCNG2-Hs00414111_m1	Target	33.2886	3.88302	35.2674	4.38221	31.5835	1.12582	37.6959	3.57053	40	0	33.4565	1.01304	12.6207	3.08129	15.1759	4.49375	9.31838	0.970259	18.0056	3.16303	19.2009	0.219079	13.5271	1.10885
KCNG3-Hs00373177_m1	Target	37.8812	2.90134	36.493	3.20748	40	0	32.2199	1.06521	32.8693	0.825051	40	0	17.2134	3.42091	16.4015	3.09354	17.7348	1.02363	12.5296	0.8794	12.0701	0.764325	20.0705	0.0991437
KCNG4-Hs00395751_m1	Target	40	0	40	0	40	0	40	0	40	0	40	0	19.3321	0.821912	19.9085	0.195795	17.7348	1.02363	20.3097	0.451326	19.2009	0.219079	20.0705	0.0991437
KCNH1-Hs00608142_m1	Target	40	0	38.8987	2.46249	40	0	37.7552	3.88817	38.7734	2.12459	36.5557	3.91076	19.3321	0.821912	18.8073	2.45142	17.7348	1.02363	18.0649	4.24326	17.9742	1.91431	16.6262	3.97965
KCNH2-Hs00165120_m1	Target	37.3413	3.67198	36.4464	3.87761	40	0	38.327	2.89772	31.5111	0.605638	30.6115	0.489385	16.6734	3.56315	16.3549	3.8903	17.7348	1.02363	18.6367	2.47804	10.7119	0.500952	10.682	0.585623
KCNH2-Hs00542478_m1	Target	39.1131	1.98308	38.1278	3.57438	37.7764	3.15233	36.6257	3.17441	40	0	40	0	18.4453	2.07723	18.0363	3.76505	15.5113	2.72108	16.9355	3.30431	19.2009	0.219079	20.0705	0.0991437
KCNH3-Hs00393928_m1	Target	32.5972	1.60923	29.5466	0.680904	27.4837	0.934481	26.6667	0.419448	35.2908	4.12079	38.0903	3.30776	11.9293	1.22943	9.4551	0.682376	5.21858	0.409731	6.97637	0.112221	14.4917	3.9464	18.1608	3.20922
KCNH4-Hs00202206_m1	Target	29.8175	1.33512	29.4119	0.596957	35.8595	3.85127	23.2147	0.505	25.4272	0.326968	28.9753	0.313554	9.14968	0.520831	9.32046	0.446324	13.5943	3.06613	3.52437	0.161451	4.6281	0.18116	9.04573	0.224684
KCNH5-Hs00544949_m1	Target	40	0	40	0	40	0	40	0	40	0	40	0	19.3321	0.821912	19.9085	0.195795	17.7348	1.02363	20.3097	0.451326	19.2009	0.219079	20.0705	0.0991437
KCNH6-Hs00229215_m1	Target	40	0	35.1031	2.86561	40	0	39.695	0.528275	35.604	3.91044	40	0	19.3321	0.821912	15.0117	2.68262	17.7348	1.02363	20.0047	0.920542	14.8048	4.12936	20.0705	0.0991437
KCNH7-Hs00264454_m1	Target	40	0	38.5539	3.23353	40	0	35.1445	4.21316	40	0	40	0	19.3321	0.821912	18.4624	3.19706	17.7348	1.02363	15.4542	3.85995	19.2009	0.219079	20.0705	0.0991437
KCNH8-Hs00292491_m1	Target	36.0547	3.64734	39.2964	1.57325	38.9978	2.2409	40	0	40	0	34.17	0.855174	15.3868	3.2882	19.205	1.5006	16.7327	2.02014	20.3097	0.451326	19.2009	0.219079	14.2405	0.908563
KCNJ1-Hs00165012_m1	Target	37.906	1.95008	34.3333	3.29085	39.3025	1.55975	36.7927	3.06273	40	0	35.7897	3.64677	17.2381	1.48977	14.2419	3.09736	17.0373	1.94011	17.1024	2.9013	19.2009	0.219079	15.8602	3.59048
KCNJ1-Hs00531188_m1	Target	40	0	37.0329	2.93833	40	0	38.9414	1.83355	39.9743	0.0445714	37.4529	4.41165	19.3321	0.821912	16.9415	2.91898	17.7348	1.02363	19.2511	2.19799	19.1751	0.176463	17.5234	4.47099
KCNJ1-Hs00538213_m1	Target	31.1056	1.55278	24.3125	0.700894	38.9314	2.38955	29.3601	0.222252	29.1803	0.374755	28.5301	0.199906	10.4378	1.0041	4.221	0.643336	16.6662	2.23348	9.66977	0.669156	8.38117	0.239419	8.6006	0.275267
KCNJ1-Hs01650642_m1	Target	40	0	39.0558	1.03077	40	0	40	0	40	0	40	0	19.3321	0.821912	18.9643	1.02909	17.7348	1.02363	20.3097	0.451326	19.2009	0.219079	20.0705	0.0991437
KCNJ10-Hs00158426_m1	Target	30.3476	2.1863	37.9961	2.77279	36.1137	3.91564	40	0	38.3683	2.82619	38.9917	1.74643	9.67974	1.81136	17.9046	2.93359	13.8485	4.33488	20.3097	0.451326	17.5692	2.98626	19.0622	1.64791
KCNJ10-Hs01922935_s1	Target	28.1776	1.89817	32.2867	0.677715	33.3578	3.92345	30.3594	2.10487	29.0682	0.472529	30.6085	0.553644	7.50974	1.68693	12.1952	0.772433	11.0927	4.20957	10.6691	2.20309	8.26907	0.277295	10.679	0.613308
KCNJ11-Hs00265026_s1	Target	28.8891	0.581686	30.4044	1.6625	32.9271	3.11633	23.6716	0.691235	27.1294	0.475232	25.9777	0.581822	8.22122	0.911312	10.3129	1.65663	10.662	2.4295	3.98127	0.289159	6.33023	0.321578	6.0482	0.484535
KCNJ12-Hs00253248_s1	Target	33.849	3.85996	37.1244	3.97621	34.9377	5.14462	35.7398	7.37888	34.8277	0.161589	40	0	13.1812	4.45406	17.0329	3.9036	12.6725	4.85824	16.0495	7.47138	14.0285	0.255754	20.0705	0.0991437
KCNJ13-Hs00396576_m1	Target	40	0	40	0	40	0	40	0	40	0	36.3607	6.30351	19.3321	0.821912	19.9085	0.195795	17.7348	1.02363	20.3097	0.451326	19.2009	0.219079	16.4312	6.34408
KCNJ14-Hs00247453_m1	Target	40	0	40	0	40	0	40	0	40	0	37.9244	3.59499	19.3321	0.821912	19.9085	0.195795	17.7348	1.02363	20.3097	0.451326	19.2009	0.219079	17.9949	3.65449
KCNJ14-Hs00601649_m1	Target	32.2292	0.644966	32.7356	0.550442	33.4614	1.10254	29.7562	0.164833	30.7663	0.258147	28.5012	0.254544	11.5613	0.954898	12.6441	0.709674	11.1962	0.567674	10.0659	0.413326	9.9672	0.279552	8.5717	0.346782
KCNJ15-Hs00158427_m1	Target	28.4035	0.861257	28.9748	0.811743	28.098	1.10956	36.3387	3.17624	30.3264	0.180506	29.4858	0.717232	7.73562	0.774872	8.88332	0.939158	5.83282	0.303205	16.6485	3.59531	9.5273	0.396603	9.5563	0.810007
KCNJ16-Hs00542450_m1	Target	37.4285	3.5233	40	0	40	0	38.8643	1.96709	40	0	39.8579	0.246182	16.7606	3.40981	19.9085	0.195795	17.7348	1.02363	19.174	2.33042	19.2009	0.219079	19.9284	0.148023
KCNJ2-Hs00265315_m1	Target	27.6546	2.70105	26.0311	0.681455	27.5983	1.21769	22.9014	0.584485	23.8626	0.204416	39.8927	0.185791	6.98676	1.93187	5.9396	0.713845	5.3331	0.725212	3.21113	0.134683	3.06343	0.0388683	19.9632	0.25722
KCNJ3-Hs01002552_m1	Target	38.8254	2.62653	38.6884	2.93278	40	0	36.8752	5.41237	36.4213	3.17488	40	0	18.1575	2.4878	18.5969	2.85518	17.7348	1.02363	17.1849	5.76482	15.6221	3.06137	20.0705	0.0991437
KCNJ4-Hs00544821_m1	Target	40	0	40	0	40	0	40	0	37.987	3.48656	38.0864	3.31445	19.3321	0.821912	19.9085	0.195795	17.7348	1.02363	20.3097	0.451326	17.1879	3.54795	18.1569	3.21592
KCNJ4-Hs00705379_s1	Target	37.1949	3.85808	39.573	0.95489	37.3791	3.95282	32.8727	3.68484	38.1504	3.20354	32.8356	0.738716	16.527	4.44548	19.4815	0.956135	15.1139	3.62642	13.1824	3.96151	17.3513	3.36323	12.9061	0.650049
KCNJ5-Hs00168476_m1	Target	29.5262	2.52889	27.4392	1.62168	39.0048	2.22529	32.7119	0.552814	31.0023	0.706564	31.2528	0.211577	8.85842	2.63039	7.3477	1.70689	16.7397	2.08611	13.0216	0.358376	10.2032	0.621959	11.3233	0.125502
KCNJ6-Hs00158423_m1	Target	40	0	40	0	40	0	40	0	40	0	40	0	19.3321	0.821912	19.9085	0.195795	17.7348	1.02363	20.3097	0.451326	19.2009	0.219079	20.0705	0.0991437
KCNJ6-Hs01040524_m1	Target	40	0	40	0	40	0	37.2363	4.78687	38.1392	3.22294	36.0587	3.4219	19.3321	0.821912	19.9085	0.195795	17.7348	1.02363	17.546	5.14022	17.3401	3.28479	16.1292	3.37678
KCNJ8-Hs00958961_m1	Target	37.747	3.08636	40	0	38.1947	2.67141	40	0	40	0	40	0	17.0791	2.82107	19.9085	0.195795	15.9295	2.46476	20.3097	0.451326	19.2009	0.219079	20.0705	0.0991437
KCNJ9-Hs01888596_s1	Target	30.3725	0.688123	30.838	0.601856	29.9164	1.15127	34.0088	5.89408	30.315	0.0925982	28.8409	2.28371	9.70468	0.835449	10.7465	0.538751	7.6513	0.630696	14.3185	5.74363	9.51577	0.207524	8.91137	2.33098
KCNK1-Hs00158428_m1	Target	31.0682	1.17241	40	0	38.7965	2.69111	37.8351	3.49116	40	0	40	0	10.4004	1.1292	19.9085	0.195795	16.5313	3.6652	18.1448	3.61658	19.2009	0.219079	20.0705	0.0991437
KCNK10-Hs00368341_m1	Target	35.4296	3.22056	38.6644	2.98645	37.6718	2.3573	39.1176	1.42289	30.789	0.357106	40	0	14.7617	3.55953	18.5729	2.95045	15.4066	2.57496	19.4273	1.54888	9.9899	0.177396	20.0705	0.0991437
KCNK12-Hs00363726_m1	Target	38.386	2.42436	40	0	40	0	33.2765	0.517746	28.6821	0.279396	40	0	17.7181	3.1715	19.9085	0.195795	17.7348	1.02363	13.5863	0.699725	7.88303	0.224727	20.0705	0.0991437
KCNK13-Hs00740940_m1	Target	26.3907	0.927881	25.0485	0.388967	28.361	0.799782	28.9409	0.792072	24.786	0.189442	30.6811	1.31119	5.7228	0.23574	4.95702	0.387221	6.09586	0.38661	9.2506	0.448404	3.98683	0.0322542	10.7515	1.38138
KCNK15-Hs00606699_m1	Target	35.9325	2.67677	34.763	3.60642	39.5872	0.923049	36.5852	3.00101	31.1587	1.09782	40	0	15.2646	2.81859	14.6715	3.53962	17.322	1.21258	16.895	3.03217	10.3595	0.965601	20.0705	0.0991437
KCNK16-Hs00259530_m1	Target	40	0	40	0	40	0	40	0	40	0	40	0	19.3321	0.821912	19.9085	0.195795	17.7348	1.02363	20.3097	0.451326	19.2009	0.219079	20.0705	0.0991437
KCNK17-Hs00230249_m1	Target	40	0	35.7742	3.89677	33.7987	0.379647	40	0	40	0	40	0	19.3321	0.821912	15.6827	4.00674	11.5335	1.07405	20.3097	0.451326	19.2009	0.219079	20.0705	0.0991437
KCNK18-Hs00699272_m1	Target	40	0	40	0	40	0	40	0	40	0	40	0	19.3321	0.821912	19.9085	0.195795	17.7348	1.02363	20.3097	0.451326	19.2009	0.219079	20.0705	0.0991437
KCNK2-Hs00247951_m1	Target	40	0	38.8767	2.51173	40	0	38.9771	1.77171	32.123	0.33286	40	0	19.3321	0.821912	18.7852	2.47176	17.7348	1.02363	19.2868	2.13671	11.3239	0.487999	20.0705	0.0991437
KCNK3-Hs00605529_m1	Target	37.508	3.43222	38.9488	2.35047	40	0	40	0	40	0	40	0	16.8402	4.04983	18.8574	2.27427	17.7348	1.02363	20.3097	0.451326	19.2009	0.219079	20.0705	0.0991437
KCNK4-Hs00213267_m1	Target	39.1024	2.00714	39.1901	1.81095	40	0	40	0	40	0	38.2818	2.97607	18.4345	1.90934	19.0986	1.7369	17.7348	1.02363	20.3097	0.451326	19.2009	0.219079	18.3523	3.03575
KCNK5-Hs00186652_m1	Target	30.749	1.58627	31.483	1.32848	31.2795	1.42567	28.2224	0.244834	27.2418	0.346932	23.4062	0.021177	10.0812	0.882882	11.3915	1.41393	9.01438	1.70406	8.53213	0.288558	6.4427	0.163821	3.47673	0.112424
KCNK6-Hs00191390_m1	Target	25.0073	0.349449	23.9507	0.193301	25.0446	0.641031	25.3674	0.442923	25.3538	0.300562	23.8075	0.116501	4.33942	0.516997	3.85926	0.277469	2.77942	0.466353	5.67707	0.162149	4.5546	0.0936846	3.878	0.195589
KCNK7-Hs00194801_m1	Target	35.9135	3.77796	36.2564	3.55311	29.8132	0.748065	32.5902	1.19625	35.3657	4.01626	32.5488	0.795409	15.2456	4.29796	16.1649	3.64111	7.54804	0.664154	12.9	0.81083	14.5666	4.22978	12.6193	0.872418
KCNK9-Hs00363153_m1	Target	37.66	3.20627	38.7946	2.69531	40	0	40	0	38.9061	1.89469	37.6977	3.98776	16.9922	3.79116	18.7031	2.65484	17.7348	1.02363	20.3097	0.451326	18.107	2.05656	17.7682	3.88922
KCNMA1-Hs01119498_m1	Target	24.099	1.0022	23.5947	0.482153	34.4069	3.18599	35.4288	4.14902	28.0759	0.328751	33.2425	0.29714	3.4311	1.02012	3.50322	0.573723	12.1417	3.27357	15.7386	3.92527	7.27677	0.250014	13.313	0.237622
KCNMB1-Hs00188073_m1	Target	27.0094	1.02739	26.1979	0.366281	26.9007	0.638796	28.59	0.54811	22.9406	0.261022	26.5339	0.318442	6.3416	0.639101	6.10642	0.488317	4.6355	0.517503	8.8997	0.182037	2.14143	0.0518433	6.60443	0.414804
KCNMB2-Hs00175772_m1	Target	39.1141	1.98084	40	0	40	0	40	0	40	0	40	0	18.4463	1.86033	19.9085	0.195795	17.7348	1.02363	20.3097	0.451326	19.2009	0.219079	20.0705	0.0991437
KCNMB3-Hs00205246_m1	Target	28.8916	0.343496	30.645	1.05369	30.0869	0.861101	31.1386	0.534229	25.9627	0.568197	26.8344	0.400302	8.22374	0.834812	10.5535	1.13569	7.82172	0.615395	11.4483	0.867365	5.16357	0.365447	6.90487	0.421701
KCNMB4-Hs00205704_m1	Target	32.0854	1.93758	29.7283	1.21951	29.3446	1.14512	31.6298	0.44557	28.4465	0.153115	30.711	1.10959	11.4175	2.0607	9.63682	1.37343	7.07948	0.306036	11.9395	0.0326424	7.6474	0.372092	10.7815	1.20201
KCNN1-Hs00158457_m1	Target	35.6005	2.64484	33.0355	1.56591	40	0	35.8592	0.529139	34.3105	0.679773	34.7261	1.02183	14.9326	1.84722	12.944	1.63441	17.7348	1.02363	16.169	0.131343	13.5114	0.472362	14.7966	0.924786
KCNN2-Hs01030641_m1	Target	40	0	40	0	40	0	30.2045	2.66127	26.7119	0.299644	25.6696	0.966895	19.3321	0.821912	19.9085	0.195795	17.7348	1.02363	10.5142	2.94589	5.91273	0.326641	5.74007	0.902115
KCNN3-Hs00158463_m1	Target	35.2751	2.84252	35.4791	2.54232	38.6048	3.11981	33.9667	1.35297	36.3472	3.20659	32.692	0.861976	14.6072	3.17333	15.3877	2.56528	16.3396	3.36861	14.2764	0.981169	15.548	3.03007	12.7625	0.76284
KCNN4-Hs00158470_m1	Target	24.3258	1.87329	22.6502	0.291962	26.3024	1.59092	21.6091	0.916734	21.2964	0.31175	23.4119	0.567423	3.65794	1.16774	2.55872	0.384557	4.03724	0.735662	1.9188	0.519233	0.4972	0.130223	3.48237	0.482421
KCNQ1-Hs00923522_m1	Target	25.1506	1.00493	23.727	0.135233	23.6478	0.720858	31.456	0.331399	23.6232	0.291	23.0294	0.13377	4.4828	1.25372	3.63548	0.224047	1.38264	0.305375	11.7658	0.374182	2.824	0.172902	3.09993	0.17736
KCNQ2-Hs00531745_m1	Target	40	0	40	0	40	0	40	0	40	0	40	0	19.3321	0.821912	19.9085	0.195795	17.7348	1.02363	20.3097	0.451326	19.2009	0.219079	20.0705	0.0991437
KCNQ3-Hs00189619_m1	Target	36.8231	4.55788	33.8961	3.63552	40	0	35.3213	4.07346	24.4947	0.239417	40	0	16.1552	4.91765	13.8046	3.71814	17.7348	1.02363	15.631	4.0652	3.69557	0.146205	20.0705	0.0991437
KCNQ4-Hs00542548_m1	Target	32.9379	1.4093	30.4678	0.61008	34.6487	3.09269	32.8239	0.503406	25.6584	0.307451	30.2782	1.3399	12.27	0.626792	10.3763	0.630491	12.3836	3.73443	13.1336	0.861829	4.85927	0.326057	10.3486	1.42293
KCNQ5-Hs00219779_m1	Target	35.4866	4.1241	30.4839	1.50083	33.2257	1.39677	26.5713	0.757895	31.0076	0.457193	25.7892	0.516184	14.8187	3.67482	10.3924	1.53091	10.9606	0.64488	6.88103	0.318649	10.2085	0.297405	5.85967	0.553519
KCNS1-Hs00158477_m1	Target	36.4235	3.27178	31.2018	0.749166	38.7704	2.74942	30.542	0.585811	33.5424	0.816929	40	0	15.7556	2.92692	11.1103	0.738756	16.5052	2.48343	10.8517	0.140971	12.7433	1.00125	20.0705	0.0991437
KCNS2-Hs00735744_m1	Target	40	0	40	0	40	0	40	0	39.1162	1.53073	40	0	19.3321	0.821912	19.9085	0.195795	17.7348	1.02363	20.3097	0.451326	18.3171	1.69383	20.0705	0.0991437
KCNS3-Hs00158478_m1	Target	32.6633	0.561964	31.5064	1.06267	38.1392	2.57589	36.4153	3.1097	29.7285	0.306052	40	0	11.9954	1.34408	11.4149	1.00624	15.8741	3.40931	16.7251	3.03647	8.9293	0.149884	20.0705	0.0991437
KCNT1-Hs00325572_m1	Target	40	0	40	0	40	0	40	0	40	0	36.8819	2.96495	19.3321	0.821912	19.9085	0.195795	17.7348	1.02363	20.3097	0.451326	19.2009	0.219079	16.9524	2.96772
KCNT2-Hs01591285_m1	Target	38.9465	2.35565	40	0	40	0	34.9476	8.75101	40	0	40	0	18.2787	2.31537	19.9085	0.195795	17.7348	1.02363	15.2573	9.10077	19.2009	0.219079	20.0705	0.0991437
KCNU1-Hs00380426_m1	Target	40	0	40	0	40	0	38.2955	2.95234	40	0	39.9277	0.125227	19.3321	0.821912	19.9085	0.195795	17.7348	1.02363	18.6052	3.31025	19.2009	0.219079	19.9982	0.0287771
KCNV1-Hs00175813_m1	Target	39.2518	1.67303	40	0	40	0	38.9958	1.73933	34.9073	1.44652	40	0	18.5839	1.69154	19.9085	0.195795	17.7348	1.02363	19.3055	2.10463	14.1082	1.32663	20.0705	0.0991437
KCNV2-Hs00332410_s1	Target	31.4525	0.713645	32.0661	1.72694	32.1053	0.969531	27.082	0.346331	26.315	0.270649	28.1373	0.342845	10.7846	1.09724	11.9746	1.74954	9.84018	0.449903	7.3917	0.306501	5.5159	0.112557	8.2078	0.251883
KCTD10-Hs00230632_m1	Target	24.2045	0.696887	23.6953	0.0712947	26.0859	1.09846	23.1399	0.4391	23.709	0.141246	24.48	0.245857	3.5366	0.211399	3.60386	0.132728	3.82068	0.100279	3.44957	0.0748771	2.90983	0.0806257	4.55043	0.282661
KCTD13-Hs00403629_g1	Target	24.6514	0.409354	24.3531	0.401165	25.2822	0.872141	22.1182	0.526286	22.8802	0.173105	22.5761	0.0547112	3.98352	0.55745	4.26164	0.43761	3.01696	0.160508	2.42793	0.0816213	2.08107	0.0922736	2.64657	0.0459988
KCTD17-Hs00226641_m1	Target	23.2743	0.344381	24.0521	0.335661	24.8597	0.609545	27.5211	0.296164	23.8834	0.291097	25.3232	0.269839	2.6064	0.584044	3.96064	0.476962	2.59458	0.474878	7.83087	0.190175	3.08423	0.0803578	5.3937	0.216711
KCTD2-Hs00299507_m1	Target	24.8319	0.393317	24.4315	0.195124	25.7191	0.750754	25.0222	0.481551	25.2544	0.31103	25.1758	0.1094	4.16408	0.536898	4.3401	0.18112	3.45394	0.294007	5.33197	0.0370136	4.45523	0.309283	5.24633	0.194899
KCTD5-Hs00368026_m1	Target	24.5645	0.876724	24.0417	0.116139	26.3223	1.32894	22.7553	0.500472	24.5127	0.205779	23.7962	0.138737	3.8967	0.209841	3.95018	0.111692	4.05714	0.343429	3.06497	0.0651964	3.71357	0.163616	3.86673	0.0441549
MCOLN1-Hs01100653_m1	Target	22.8495	0.555794	22.6122	0.301	24.7912	1.03478	23.8134	0.311339	24.1713	0.191253	23.0754	0.342355	2.18158	0.414409	2.52066	0.264982	2.52606	0.117832	4.1231	0.158539	3.37213	0.223045	3.14587	0.424186
MCOLN2-Hs00401920_m1	Target	26.7455	1.19994	29.1344	1.05836	31.3077	0.871074	37.8867	3.6604	29.5997	0.45475	32.0206	7.23787	6.07768	0.770951	9.04294	1.1419	9.04256	0.999457	18.1964	3.76603	8.80057	0.237916	12.0911	7.32886
MCOLN3-Hs00539552_m1	Target	28.7545	1.34234	24.8124	0.383684	40	0	40	0	27.6413	0.370603	36.6895	5.73395	8.08664	0.726634	4.72094	0.332006	17.7348	1.02363	20.3097	0.451326	6.84213	0.189947	16.76	5.77459
MCOLN3-Hs00962657_m1	Target	28.4859	1.44142	24.601	0.22612	39.1068	1.99726	39.3986	1.04171	28.1204	0.327609	35.5566	4.04407	7.81804	0.745637	4.50952	0.176505	16.8416	2.0267	19.7083	1.20582	7.3212	0.324556	15.6271	4.03519
MLC1-Hs01126548_m1	Target	32.1061	2.08407	32.3637	1.39306	27.9675	0.815606	33.2906	0.359905	27.4465	0.139165	26.4034	0.107392	11.4383	2.24414	12.2722	1.47319	5.70234	1.01291	13.6004	0.711469	6.64733	0.107682	6.47383	0.0676958
NALCN-Hs00291166_m1	Target	40	0	40	0	40	0	40	0	40	0	40	0	19.3321	0.821912	19.9085	0.195795	17.7348	1.02363	20.3097	0.451326	19.2009	0.219079	20.0705	0.0991437
ORAI1-Hs00385627_m1	Target	25.3914	0.427555	25.5707	0.191432	26.4173	0.901907	25.6947	0.288321	26.3012	0.28514	24.3177	0.0770318	4.72356	0.401765	5.4792	0.339024	4.1522	0.210065	6.0044	0.397139	5.5021	0.21533	4.38817	0.0914456
ORAI2-Hs00259863_m1	Target	24.9737	0.45718	26.4912	0.344476	25.7653	0.590527	25.1424	0.400476	26.5092	0.48376	24.4142	0.155829	4.30586	0.434084	6.3997	0.503047	3.50018	0.760524	5.4521	0.123125	5.71	0.330847	4.48463	0.18874
ORAI3-Hs00743683_s1	Target	24.2359	0.857599	23.7622	0.42479	24.9242	0.651555	23.8169	0.338924	24.3047	0.396284	23.257	0.740677	3.5681	1.03336	3.67078	0.466019	2.6591	0.52613	4.12663	0.152258	3.50553	0.192927	3.3275	0.838531
ORAI3-Hs00752190_s1	Target	24.6854	1.05834	24.0458	0.305466	25.5795	0.944527	24.1766	0.482724	24.8933	0.0337805	24.0088	0.0505474	4.01756	0.747515	3.95426	0.394475	3.31432	0.093217	4.48637	0.0370951	4.09417	0.206468	4.0793	0.0737359
P2RX1-Hs00175686_m1	Target	26.0515	0.878254	24.6568	0.461146	24.5694	0.358137	23.6695	0.438574	25.2156	0.34805	24.2507	0.222648	5.3837	1.14094	4.5653	0.375246	2.3042	0.911459	3.97927	0.0385924	4.4165	0.170509	4.32113	0.31163
P2RX2-Hs00247255_m1	Target	38.2624	3.88535	40	0	40	0	40	0	40	0	40	0	17.5946	3.7044	19.9085	0.195795	17.7348	1.02363	20.3097	0.451326	19.2009	0.219079	20.0705	0.0991437
P2RX3-Hs01125554_m1	Target	40	0	40	0	40	0	40	0	38.1794	3.15331	40	0	19.3321	0.821912	19.9085	0.195795	17.7348	1.02363	20.3097	0.451326	17.3803	2.94273	20.0705	0.0991437
P2RX4-Hs00602442_m1	Target	21.5918	0.659476	22.6837	0.189392	24.4831	0.520285	22.4023	0.498248	22.1282	0.233673	23.1718	0.197013	0.92394	0.452687	2.5922	0.155319	2.21798	0.517718	2.71207	0.154413	1.3291	0.064583	3.24227	0.206014
P2RX5-Hs00175712_m1	Target	26.2246	0.842233	29.4312	0.693942	28.5929	1.01161	25.0845	0.594953	25.6337	0.0142581	25.6543	0.128909	5.5567	1.10337	9.33968	0.747159	6.32776	0.921006	5.39423	0.226242	4.8345	0.233276	5.72483	0.0954134
P2RX6-Hs01003997_m1	Target	32.5422	1.22217	30.2428	0.931006	36.5341	3.24678	29.9129	0.623015	29.1022	0.374509	32.5256	0.16553	11.8743	1.68611	10.1513	1.00483	14.2689	2.45698	10.2226	1.00013	8.3031	0.17069	12.5961	0.134149
P2RX7-Hs00175721_m1	Target	23.7963	0.947794	24.0626	0.318995	25.3992	0.905565	26.8245	0.69397	27.5854	0.23436	24.7362	0.292556	3.12848	0.778974	3.97106	0.400319	3.1341	0.161788	7.1342	0.31834	6.78623	0.194109	4.8067	0.385189
PGK1-Hs99999906_m1	Selected Control	20.3156	0.771382	19.6833	0.244817	21.0911	0.639197	19.3209	0.312859	20.5577	0.285131	18.8531	0.0726001	-0.35228	0.400001	-0.40816	0.130629	-1.17404	0.48311	-0.369333	0.171766	-0.2414	0.0836602	-1.0764	0.0523011
PKD1L1-Hs00370557_m1	Target	29.4508	0.601683	26.5348	0.927523	32.5918	1.02141	31.4217	0.659065	27.2952	0.401835	30.9713	0.264105	8.783	1.33523	6.4433	0.737643	10.3266	0.975034	11.7314	0.208427	6.49607	0.188642	11.0418	0.186129
PKD1L2-Hs00385217_m1	Target	40	0	38.6348	3.05264	40	0	40	0	40	0	38.3876	2.7927	19.3321	0.821912	18.5433	2.97481	17.7348	1.02363	20.3097	0.451326	19.2009	0.219079	18.4581	2.85245
PKD2-Hs00165517_m1	Target	24.248	0.330111	25.1418	0.223259	26.8873	0.368055	26.312	0.279628	22.9546	0.264195	25.4413	0.130274	3.58016	0.88758	5.05038	0.34831	4.62212	0.893492	6.62167	0.172164	2.15543	0.153322	5.51177	0.217604
PKD2L1-Hs00175850_m1	Target	32.9633	6.84999	31.8309	1.78703	38.5349	3.27597	35.112	4.28688	37.9536	3.54453	36.6279	5.84059	12.2955	6.45674	11.7395	1.80326	16.2697	2.97878	15.4217	3.90711	17.1544	3.70383	16.6984	5.88127
PKD2L2-Hs00950467_m1	Target	40	0	40	0	40	0	40	0	40	0	38.0337	3.40567	19.3321	0.821912	19.9085	0.195795	17.7348	1.02363	20.3097	0.451326	19.2009	0.219079	18.1042	3.44685
PKDREJ-Hs00271985_s1	Target	35.0979	2.80668	33.2513	0.413874	33.784	1.13099	31.6877	1.67396	31.7759	0.456941	30.7917	0.332424	14.4301	3.15422	13.1598	0.400907	11.5189	1.10506	11.9975	1.48086	10.9768	0.344432	10.8622	0.27442
PLLP-Hs00762550_s1	Target	30.6685	1.22881	30.9712	0.811478	31.095	0.961388	30.6426	2.20072	30.1569	0.396504	32.7825	1.29054	10.0007	0.618137	10.8797	0.631157	8.82986	0.473554	10.9524	2.24912	9.3578	0.475092	12.853	1.21597
PPIA-Hs99999904_m1	Selected Control	19.1115	0.749529	18.3579	0.176296	20.6813	0.646635	17.9064	0.458447	18.6735	0.286954	17.7508	0.108977	-1.55634	0.155827	-1.73362	0.180643	-1.58392	0.461593	-1.78387	0.0150895	-2.12567	0.0921142	-2.17867	0.187556
RPLP0-Hs99999902_m1	Selected Control	21.0792	0.649098	20.1595	0.257325	21.1964	1.24225	18.2175	0.463039	18.9284	0.301383	18.3807	0.0868914	0.41132	0.560445	0.06796	0.264992	-1.0688	0.241929	-1.47277	0.0125898	-1.87067	0.0881446	-1.5488	0.132396
RYR1-Hs00166991_m1	Target	34.1817	3.29867	37.2232	3.81933	30.9562	0.789052	40	0	38.2596	3.01446	37.5635	4.22014	13.5139	2.51783	17.1317	3.92581	8.691	0.517066	20.3097	0.451326	17.4605	2.8039	17.634	4.26103
RYR2-Hs00892842_m1	Target	35.2309	4.65722	40	0	40	0	37.6879	4.00473	38.8116	2.05843	34.3751	1.60453	14.563	4.18069	19.9085	0.195795	17.7348	1.02363	17.9976	4.35956	18.0124	2.12409	14.4456	1.61994
RYR3-Hs00168821_m1	Target	37.5732	3.32364	38.21	4.00265	32.6259	1.24827	40	0	40	0	40	0	16.9053	3.14248	18.1185	4.19427	10.3608	0.93255	20.3097	0.451326	19.2009	0.219079	20.0705	0.0991437
SCN10A-Hs00197867_m1	Target	40	0	40	0	40	0	40	0	40	0	37.9846	2.05726	19.3321	0.821912	19.9085	0.195795	17.7348	1.02363	20.3097	0.451326	19.2009	0.219079	18.0551	2.05227
SCN11A-Hs00204222_m1	Target	31.9685	4.68348	33.6087	1.68764	38.75	2.795	38.3699	2.82347	38.1677	3.17358	34.7531	3.26294	11.3007	3.95384	13.5172	1.71749	16.4849	2.5258	18.6796	3.18191	17.3686	3.23559	14.8237	3.25595
SCN1A-Hs00374696_m1	Target	40	0	36.8121	2.91562	40	0	35.6107	7.60255	40	0	40	0	19.3321	0.821912	16.7206	2.80464	17.7348	1.02363	15.9204	7.95298	19.2009	0.219079	20.0705	0.0991437
SCN1B-Hs00962350_m1	Target	27.4287	1.04887	26.5638	0.426727	29.9411	0.641926	32.6673	0.905279	30.1882	0.336987	29.9679	0.204075	6.76084	1.1604	6.4723	0.541525	7.67594	0.708442	12.977	0.6619	9.38907	0.47017	10.0384	0.257007
SCN2A-Hs00221379_m1	Target	40	0	40	0	40	0	40	0	40	0	40	0	19.3321	0.821912	19.9085	0.195795	17.7348	1.02363	20.3097	0.451326	19.2009	0.219079	20.0705	0.0991437
SCN2B-Hs00394952_m1	Target	40	0	40	0	37.1874	3.87022	39.3646	1.10049	40	0	37.5833	4.1859	19.3321	0.821912	19.9085	0.195795	14.9223	3.41623	19.6744	1.47451	19.2009	0.219079	17.6538	4.2268
SCN3A-Hs00366902_m1	Target	35.4418	2.65295	40	0	36.1028	2.68546	40	0	40	0	36.6283	2.92182	14.774	3.01689	19.9085	0.195795	13.8376	1.91076	20.3097	0.451326	19.2009	0.219079	16.6988	2.86726
SCN3B-Hs00218184_m1	Target	36.1867	3.94174	32.6613	1.40099	40	0	40	0	31.9466	1.26895	40	0	15.5188	3.68927	12.5698	1.50175	17.7348	1.02363	20.3097	0.451326	11.1474	1.19833	20.0705	0.0991437
SCN4A-Hs00165686_m1	Target	37.8378	2.96094	38.861	2.54688	40	0	40	0	38.0056	3.4544	39.3497	1.12641	17.17	2.7965	18.7695	2.73861	17.7348	1.02363	20.3097	0.451326	17.2065	3.61379	19.4202	1.16986
SCN4B-Hs00545394_m1	Target	38.6176	3.09123	30.7715	1.55779	34.3353	3.19838	40	0	37.9332	3.57974	40	0	17.9497	3.12636	10.6799	1.67221	12.0701	2.3018	20.3097	0.451326	17.1341	3.64098	20.0705	0.0991437
SCN5A-Hs00165693_m1	Target	40	0	35.1852	4.50887	35.0199	3.32172	39.75	0.432955	35.3335	1.14619	28.772	0.171519	19.3321	0.821912	15.0937	4.57666	12.7547	3.17959	20.0597	0.678112	14.5344	1.278	8.84243	0.0772752
SCN7A-Hs00161546_m1	Target	38.7236	2.85416	38.4539	3.45723	39.7305	0.602576	29.9318	0.741235	40	0	40	0	18.0557	2.70494	18.3624	3.64888	17.4653	0.936062	10.2415	0.30924	19.2009	0.219079	20.0705	0.0991437
SCN8A-Hs00274075_m1	Target	31.3356	0.704141	34.0624	0.83812	37.7039	3.15106	40	0	32.0734	0.823838	26.6063	0.063635	10.6678	0.692704	13.971	1.01811	15.4387	2.61107	20.3097	0.451326	11.2742	0.609457	6.67683	0.160657
SCN9A-Hs00161567_m1	Target	32.326	1.32708	25.7146	0.678095	29.8977	1.936	32.0949	0.253027	40	0	40	0	11.6581	0.99554	5.62308	0.827828	7.63248	0.983266	12.4046	0.567992	19.2009	0.219079	20.0705	0.0991437
SCNN1A-Hs00168906_m1	Target	29.3269	1.586	31.4184	0.568931	31.3109	0.959976	31.3181	0.209227	30.7296	0.989146	32.8007	0.540075	8.659	1.2864	11.3269	0.721404	9.04574	0.469202	11.6279	0.492111	9.93047	0.977105	12.8712	0.449772
SCNN1B-Hs00165722_m1	Target	36.9106	2.22777	40	0	40	0	40	0	40	0	37.0999	2.58681	16.2428	2.14647	19.9085	0.195795	17.7348	1.02363	20.3097	0.451326	19.2009	0.219079	17.1704	2.68511
SCNN1D-Hs00161595_m1	Target	36.252	1.39021	37.1443	0.497452	36.151	0.754453	39.0017	0.914868	39.3356	0.744468	35.2786	0.637265	15.5841	1.78972	17.0528	0.621765	13.8858	0.514092	19.3114	1.08142	18.5364	0.859758	15.3491	0.701993
SCNN1G-Hs00168918_m1	Target	37.9501	2.81091	38.9123	2.43208	40	0	40	0	40	0	40	0	17.2822	2.64451	18.8209	2.35565	17.7348	1.02363	20.3097	0.451326	19.2009	0.219079	20.0705	0.0991437
STIM1-Hs00162394_m1	Target	23.1863	0.356267	23.6097	0.277568	24.5795	0.853319	22.8772	0.380155	23.5722	0.314871	23.6944	0.191074	2.5185	0.718286	3.51818	0.263379	2.31432	0.194017	3.18697	0.138979	2.7731	0.130718	3.76483	0.27619
STIM1-Hs00963373_m1	Target	23.4201	0.476319	24.0101	0.219606	25.2207	1.41169	23.4799	0.671397	23.5368	0.441665	23.7196	0.311706	2.75222	0.913956	3.91868	0.19983	2.95552	0.449222	3.78967	0.881996	2.73767	0.235335	3.79007	0.39749
STIM2-Hs00956219_m1	Target	26.3238	1.04552	26.4382	0.437733	27.7582	1.97218	23.8418	0.865979	25.814	0.284612	24.7317	2.19292	5.65598	0.412511	6.34666	0.489742	5.493	0.986235	4.15147	1.1819	5.01483	0.492439	4.8022	2.24011
TAS1R1-Hs00371023_m1	Target	40	0	40	0	40	0	40	0	40	0	40	0	19.3321	0.821912	19.9085	0.195795	17.7348	1.02363	20.3097	0.451326	19.2009	0.219079	20.0705	0.0991437
TAS1R3-Hs01026531_g1	Target	29.0319	0.550683	29.1323	0.585384	28.4493	0.86648	27.518	0.131369	27.8139	0.210186	26.9771	0.457584	8.3641	0.691043	9.04076	0.7729	6.1841	0.201438	7.82767	0.321873	7.0148	0.0686278	7.04763	0.3617
TBP-Hs99999910_m1	Selected Control	26.1292	0.82061	25.8942	0.191189	26.5641	1.16546	24.4946	0.409169	25.5301	0.169209	25.3072	0.330816	5.46132	0.158748	5.8027	0.236182	4.29894	0.206121	4.80437	0.0501755	4.73093	0.0942425	5.37773	0.244842
TFRC-Hs99999911_m1	Selected Control	18.906	0.850331	19.3053	0.593287	26.2676	1.09266	20.7356	0.486056	22.6179	0.269485	21.7699	0.263263	-1.7619	0.496622	-0.78614	0.447354	4.00242	0.185203	1.04533	0.0570442	1.81873	0.0663268	1.8404	0.164561
TMEM38A-Hs00225325_m1	Target	29.999	1.07296	28.1069	0.386913	26.9729	0.606317	30.7969	0.314353	29.6691	0.273519	24.1225	0.074318	9.33116	1.37351	8.01538	0.48503	4.7077	0.535431	11.1066	0.765679	8.86993	0.207082	4.19303	0.0386735
TMEM38B-Hs00216531_m1	Target	22.4742	0.48288	23.1986	0.386283	26.7086	0.921719	23.293	0.551954	24.4454	0.238314	22.0763	0.109915	1.80634	0.600084	3.10716	0.22274	4.44346	0.231745	3.6027	0.106124	3.64627	0.0345726	2.14683	0.126554
TPCN1-Hs00330542_m1	Target	23.8384	1.92689	20.4396	0.346607	21.4216	0.837641	23.3747	0.201503	20.1405	0.300104	22.1015	0.143077	3.17048	2.04393	0.34816	0.481662	-0.84354	0.298331	3.68437	0.32578	-0.658633	0.0989493	2.172	0.0575918
TPCN2-Hs01552063_m1	Target	25.1306	0.444896	24.6371	0.437329	25.1201	0.872339	26.7746	0.507991	24.7455	0.370763	24.237	0.384606	4.46268	0.555329	4.54562	0.351574	2.85494	0.431635	7.0843	0.0773632	3.94637	0.185584	4.3075	0.483687
TRPA1-Hs00175798_m1	Target	38.5034	3.3465	38.4438	3.47968	40	0	34.8504	4.48014	38.3711	2.8214	40	0	17.8355	3.1796	18.3524	3.4428	17.7348	1.02363	15.1601	4.17678	17.5719	2.61088	20.0705	0.0991437
TRPC1-Hs00608195_m1	Target	32.1551	1.17541	32.2961	1.63305	35.1259	2.81715	35.3378	4.08935	30.3923	0.399538	29.9656	0.0809796	11.4872	1.79087	12.2046	1.6653	12.8607	3.3928	15.6475	3.70976	9.59313	0.611339	10.0361	0.132044
TRPC3-Hs00162985_m1	Target	31.7454	4.84846	38.5377	3.2698	40	0	30.3558	0.169315	28.6184	0.23088	34.7643	4.53432	11.0775	5.11482	18.4462	3.25681	17.7348	1.02363	10.6655	0.519612	7.8192	0.398552	14.8348	4.63282
TRPC4-Hs00211805_m1	Target	40	0	40	0	40	0	38.2588	3.0159	40	0	40	0	19.3321	0.821912	19.9085	0.195795	17.7348	1.02363	18.5685	3.37358	19.2009	0.219079	20.0705	0.0991437
TRPC5-Hs00202960_m1	Target	40	0	40	0	40	0	40	0	35.7867	3.64958	40	0	19.3321	0.821912	19.9085	0.195795	17.7348	1.02363	20.3097	0.451326	14.9875	3.49368	20.0705	0.0991437
TRPC6-Hs00395102_m1	Target	32.4185	0.685157	30.1693	2.56814	34.5279	5.31694	37.1284	4.97381	40	0	39.8577	0.246529	11.7507	0.493664	10.0778	2.69478	12.2628	6.03251	17.4381	5.32687	19.2009	0.219079	19.9282	0.300484
TRPC7-Hs00220638_m1	Target	39.3383	1.47956	40	0	37.5351	3.37518	40	0	39.3659	1.09835	37.2657	4.73589	18.6705	1.44375	19.9085	0.195795	15.27	3.95853	20.3097	0.451326	18.5667	1.2639	17.3362	4.79519
TRPM1-Hs00170127_m1	Target	40	0	34.5374	1.00047	40	0	40	0	34.4403	0.617895	40	0	19.3321	0.821912	14.4459	1.01591	17.7348	1.02363	20.3097	0.451326	13.6412	0.435933	20.0705	0.0991437
TRPM2-Hs00268573_m1	Target	24.9962	1.04993	24.075	0.321551	24.5582	0.724169	23.6865	0.317258	21.7294	0.378286	21.3704	0.136006	4.32838	0.991659	3.98356	0.45697	2.29308	0.514751	3.9962	0.322133	0.930267	0.225282	1.44083	0.235206
TRPM2-Hs01066071_m1	Target	25.1725	0.71972	23.889	0.240619	24.4272	0.672394	24.075	0.278199	21.7755	0.320099	21.4168	0.0604751	4.50458	1.01719	3.79754	0.38838	2.16206	0.601662	4.38477	0.173598	0.976333	0.10276	1.48727	0.137865
TRPM3-Hs00257553_m1	Target	40	0	40	0	40	0	37.6781	4.02171	38.1105	2.40038	38.2151	3.09154	19.3321	0.821912	19.9085	0.195795	17.7348	1.02363	17.9878	4.37644	17.3114	2.58957	18.2856	3.13278
TRPM4-Hs00214167_m1	Target	25.4262	0.35247	25.9779	0.111216	29.3705	0.842572	35.3588	4.01984	25.8104	0.41991	26.8065	0.0359728	4.75828	0.839541	5.88644	0.271425	7.1053	0.778009	15.6685	3.69115	5.01123	0.205924	6.87693	0.0807133
TRPM5-Hs00175822_m1	Target	39.1008	2.01067	39.1149	1.97914	38.8784	2.50793	38.3416	2.87243	34.6219	0.294535	38.7627	2.14307	18.4329	2.10266	19.0234	1.9043	16.6132	2.26103	18.6513	2.4528	13.8227	0.440607	18.8332	2.20315
TRPM6-Hs00214306_m1	Target	35.1671	2.75862	37.9875	2.82141	34.4332	3.48652	38.6054	2.41558	40	0	40	0	14.4993	3.0624	17.896	2.97156	12.168	3.4604	18.9151	2.77597	19.2009	0.219079	20.0705	0.0991437
TRPM7-Hs00918956_m1	Target	24.7303	1.10936	24.3176	0.292469	26.8667	2.19327	24.0408	0.432369	24.9988	0.13435	23.0843	0.416661	4.06242	0.445299	4.22608	0.264506	4.6015	1.22406	4.35053	0.459376	4.19963	0.317796	3.15487	0.37985
TRPM8-Hs01066596_m1	Target	40	0	39.1128	1.98375	40	0	32.7879	0.79796	36.0739	3.4001	29.2284	9.65114	19.3321	0.821912	19.0214	1.94577	17.7348	1.02363	13.0976	0.347233	15.2748	3.3515	9.29887	9.74369
TRPV1-Hs00218912_m1	Target	27.94	0.699095	25.6541	0.594515	29.8283	1.7756	25.3797	0.408573	27.5499	0.353557	28.653	0.114791	7.2721	0.725287	5.56266	0.503011	7.56314	0.805456	5.68943	0.0537555	6.75073	0.165419	8.72347	0.164567
TRPV2-Hs00901640_m1	Target	20.6549	0.50957	20.1508	0.317666	23.8795	0.511426	21.8907	0.332486	22.8281	0.361244	21.6253	0.409574	-0.0129	0.609922	0.05936	0.182677	1.61436	0.57362	2.20043	0.146606	2.02897	0.142649	1.69573	0.482645
TRPV3-Hs00376854_m1	Target	33.7904	3.54847	37.5717	3.33745	40	0	32.6439	0.818773	31.1511	0.654216	39.19	1.40296	13.1225	2.79165	17.4802	3.45001	17.7348	1.02363	12.9537	0.489237	10.3519	0.488421	19.2605	1.44574
TRPV4-Hs00222101_m1	Target	25.9549	0.460237	27.1941	0.575387	29.3918	0.627692	40	0	34.9101	0.536274	39.8592	0.243873	5.28706	0.78605	7.10262	0.605464	7.12666	0.803397	20.3097	0.451326	14.111	0.329724	19.9297	0.297953
TRPV4-Hs00540967_m1	Target	25.8679	0.792955	26.8125	0.566177	29.3959	0.399026	40	0	33.5912	0.636923	40	0	5.20006	0.711587	6.721	0.580617	7.13072	0.668942	20.3097	0.451326	12.792	0.708063	20.0705	0.0991437
TRPV4-Hs01099348_m1	Target	24.9242	0.695573	26.0793	0.599621	28.4946	0.432351	34.9866	3.30454	31.764	0.37123	37.8163	3.78234	4.25634	0.862554	5.98784	0.670654	6.22944	0.794326	15.2963	3.00193	10.9649	0.166493	17.8868	3.82334
TRPV4-Hs01099350_m1	Target	25.8256	0.792847	26.7249	0.69003	29.1938	0.470667	37.281	4.70945	37.966	3.52299	38.7042	1.40398	5.15778	0.764568	6.63338	0.745779	6.92868	0.798323	17.5907	5.06292	17.1668	3.3124	18.7747	1.47782
TRPV5-Hs00219765_m1	Target	32.7582	0.881287	30.4698	0.920489	40	0	33.379	0.620686	38.1483	3.20718	30.4547	0.494728	12.0904	1.05357	10.3783	0.926382	17.7348	1.02363	13.6887	0.207508	17.3492	3.36681	10.5252	0.484785
TRPV6-Hs00367960_m1	Target	32.0148	0.828697	30.9139	1.1241	31.8127	1.2495	26.5824	0.29548	30.8479	0.256596	31.9521	0.558206	11.3469	1.00541	10.8224	1.17421	9.54754	0.422935	6.89213	0.173076	10.0487	0.372716	12.0226	0.47639
VDAC1-Hs01631624_gH	Target	22.3342	1.28262	21.6852	0.319228	24.6687	1.34476	21.6653	0.383856	22.0507	0.143182	21.4895	0.159172	1.66628	0.481064	1.59374	0.224069	2.40352	0.347471	1.975	0.15381	1.2515	0.208552	1.56	0.213112
VDAC2-Hs00762994_s1	Target	24.3529	1.60651	23.8768	0.302468	26.2775	2.26121	22.3581	0.570365	26.4996	0.262611	24.9448	0.365139	3.68506	0.814056	3.78528	0.253941	4.01234	1.29834	2.66787	0.796063	5.7005	0.407562	5.01527	0.268493
VDAC3-Hs01091534_g1	Target	23.228	0.76352	22.8267	0.350514	24.2504	0.774147	23.1193	0.334388	22.7846	0.171327	21.2076	0.134217	2.56012	0.171169	2.7352	0.362539	1.9852	0.333282	3.42903	0.253771	1.98543	0.0580733	1.27807	0.220941
